# Supplementary material
Source: HighWire-hosted journal article supplement (https://jitc.bmj.com/content/8/2/e000444)
Supplement: inline-supplementary-material-4 [file inline-supplementary-material-4.xlsx]

## Sheet: Table S4
Table S4 Results of GO analysis of 248 differentially expressed immune related genes
GO_ID	Description	TYPE	GeneRatio	BgRatio	pvalue	qvalue	Count	genes	enrich_factor
GO:0042510	regulation of tyrosine phosphorylation of Stat1 protein	biological_process	5/95	16/18668	2.345e-09	7.635e-08	5	LIF IFNG IL23A SOCS1 KIT	61.41
GO:0042508	tyrosine phosphorylation of Stat1 protein	biological_process	5/95	19/18668	5.494e-09	1.493e-07	5	LIF IFNG IL23A SOCS1 KIT	51.71
GO:2000406	positive regulation of T cell migration	biological_process	5/95	20/18668	7.112e-09	1.865e-07	5	CXCL13 CCL20 FADD CXCL10 CCL21	49.13
GO:0070233	negative regulation of T cell apoptotic process	biological_process	4/95	17/18668	1.631e-07	2.947e-06	4	RORC FADD ADA RAG1	46.24
GO:0042095	interferon-gamma biosynthetic process	biological_process	4/95	17/18668	1.631e-07	2.947e-06	4	FOXP3 CD276 LILRB1 TLR8	46.24
GO:2000404	regulation of T cell migration	biological_process	5/95	23/18668	1.448e-08	3.432e-07	5	CXCL13 CCL20 FADD CXCL10 CCL21	42.72
GO:0001914	regulation of T cell mediated cytotoxicity	biological_process	4/95	22/18668	4.896e-07	7.556e-06	4	PVR LILRB1 IL23A FADD	35.73
GO:0048020	CCR chemokine receptor binding	molecular_function	6/95	34/18668	3.299e-09	9.874e-08	6	CCL21 CXCL13 CCL20 CCL14 CCL18 CCL25	34.68
GO:0008009	chemokine activity	molecular_function	8/95	47/18668	2.674e-11	1.495e-09	8	CCL21 CXCL13 CCL20 CXCL10 CCL14 CXCL1 CCL18 CCL25	33.45
GO:0060334	regulation of interferon-gamma-mediated signaling pathway	biological_process	4/95	24/18668	7.141e-07	1.058e-05	4	IFNG SOCS1 NLRC5 STAT1	32.75
GO:0048247	lymphocyte chemotaxis	biological_process	8/95	50/18668	4.375e-11	2.235e-09	8	SAA1 CCL21 CXCL13 CCL20 CXCL10 CCL14 CCL18 CCL25	31.44
GO:0032620	interleukin-17 production	biological_process	4/95	25/18668	8.534e-07	1.222e-05	4	FOXP3 IFNG IL23A TLR2	31.44
GO:0060330	regulation of response to interferon-gamma	biological_process	4/95	25/18668	8.534e-07	1.222e-05	4	IFNG SOCS1 NLRC5 STAT1	31.44
GO:0002544	chronic inflammatory response	biological_process	4/95	26/18668	1.013e-06	1.377e-05	4	FOXP3 CXCL13 S100A8 THBS1	30.23
GO:0042730	fibrinolysis	biological_process	4/95	27/18668	1.196e-06	1.596e-05	4	PLAUR SERPINB2 THBS1 PLAU	29.11
GO:0072678	T cell migration	biological_process	5/95	35/18668	1.301e-07	2.440e-06	5	CCL21 CXCL13 CCL20 FADD CXCL10	28.07
GO:0042379	chemokine receptor binding	molecular_function	8/95	57/18668	1.248e-10	5.778e-09	8	CCL21 CXCL13 CCL20 CXCL10 CCL14 CXCL1 CCL18 CCL25	27.58
GO:0032655	regulation of interleukin-12 production	biological_process	7/95	50/18668	1.322e-09	4.719e-08	7	TIGIT LILRB1 IL23A THBS1 IFNG TLR2 IRF1	27.51
GO:2000107	negative regulation of leukocyte apoptotic process	biological_process	6/95	43/18668	1.408e-08	3.364e-07	6	LILRB1 ADA CCL21 RAG1 RORC FADD	27.42
GO:0070232	regulation of T cell apoptotic process	biological_process	5/95	36/18668	1.512e-07	2.765e-06	5	LGALS3 ADA RAG1 RORC FADD	27.29
GO:0030593	neutrophil chemotaxis	biological_process	12/95	87/18668	1.357e-14	1.608e-12	12	S100A8 SAA1 IL23A IFNG CCL14 CXCL1 LGALS3 TREM1 CCL21 CCL20 CCL18 CCL25	27.10
GO:0032615	interleukin-12 production	biological_process	7/95	51/18668	1.522e-09	5.306e-08	7	TIGIT LILRB1 IL23A THBS1 IFNG TLR2 IRF1	26.97
GO:0032613	interleukin-10 production	biological_process	6/95	44/18668	1.625e-08	3.762e-07	6	TIGIT LILRB1 IL23A FOXP3 TLR2 CD34	26.80
GO:0042108	positive regulation of cytokine biosynthetic process	biological_process	8/95	59/18668	1.647e-10	7.508e-09	8	CD276 THBS1 FCER1A IFNG CCL20 TLR8 TLR2 IRF1	26.64
GO:2000401	regulation of lymphocyte migration	biological_process	5/95	37/18668	1.749e-07	3.103e-06	5	CCL21 CXCL13 CCL20 FADD CXCL10	26.55
GO:0042516	regulation of tyrosine phosphorylation of Stat3 protein	biological_process	5/95	37/18668	1.749e-07	3.103e-06	5	IL23A SOCS1 KIT LIF IL22RA2	26.55
GO:1990266	neutrophil migration	biological_process	12/95	90/18668	2.014e-14	2.295e-12	12	S100A8 SAA1 IL23A IFNG CCL14 CXCL1 LGALS3 TREM1 CCL21 CCL20 CCL18 CCL25	26.20
GO:0072676	lymphocyte migration	biological_process	10/95	75/18668	1.936e-12	1.399e-10	10	GATA3 SAA1 CXCL10 CCL14 CCL21 CXCL13 CCL20 FADD CCL18 CCL25	26.20
GO:0071621	granulocyte chemotaxis	biological_process	13/95	100/18668	2.834e-15	3.999e-13	13	S100A8 SAA1 IL23A IFNG CCL14 CXCL1 LGALS3 THBS1 TREM1 CCL21 CCL20 CCL18 CCL25	25.55
GO:0042107	cytokine metabolic process	biological_process	14/95	109/18668	3.501e-16	6.916e-14	14	LILRB1 GATA3 IL19 IFNG TLR8 CMA1 CD276 THBS1 TREM1 FCER1A FOXP3 CCL20 TLR2 IRF1	25.24
GO:0042503	tyrosine phosphorylation of Stat3 protein	biological_process	5/95	39/18668	2.317e-07	4.015e-06	5	IL23A SOCS1 KIT LIF IL22RA2	25.19
GO:0070098	chemokine-mediated signaling pathway	biological_process	10/95	78/18668	2.850e-12	1.964e-10	10	CCR3 CXCL10 CCL14 CXCL1 CXCR6 CCL21 CXCL13 CCL20 CCL18 CCL25	25.19
GO:0002711	positive regulation of T cell mediated immunity	biological_process	4/95	32/18668	2.534e-06	3.115e-05	4	FOXP3 PVR IL23A FADD	24.56
GO:0001913	T cell mediated cytotoxicity	biological_process	4/95	32/18668	2.534e-06	3.115e-05	4	PVR LILRB1 IL23A FADD	24.56
GO:0043370	regulation of CD4-positive, alpha-beta T cell differentiation	biological_process	4/95	32/18668	2.534e-06	3.115e-05	4	GATA3 IL23A FOXP3 IFNG	24.56
GO:0042089	cytokine biosynthetic process	biological_process	13/95	107/18668	6.640e-15	8.198e-13	13	GATA3 LILRB1 IL19 IFNG TLR8 CMA1 CD276 THBS1 FCER1A FOXP3 CCL20 TLR2 IRF1	23.87
GO:0030195	negative regulation of blood coagulation	biological_process	5/95	42/18668	3.446e-07	5.610e-06	5	SERPINB2 THBS1 PLAU PLAUR CD34	23.39
GO:0002548	monocyte chemotaxis	biological_process	7/95	59/18668	4.319e-09	1.230e-07	7	LGALS3 CCL21 CCL20 CXCL10 CCL14 CCL18 CCL25	23.31
GO:0042093	T-helper cell differentiation	biological_process	5/95	43/18668	3.909e-07	6.295e-06	5	GATA3 IL23A RELB RORC FOXP3	22.85
GO:0042035	regulation of cytokine biosynthetic process	biological_process	11/95	95/18668	9.022e-13	6.854e-11	11	GATA3 LILRB1 IFNG TLR8 CD276 THBS1 FCER1A FOXP3 CCL20 TLR2 IRF1	22.75
GO:0050819	negative regulation of coagulation	biological_process	5/95	44/18668	4.423e-07	6.861e-06	5	SERPINB2 THBS1 PLAU PLAUR CD34	22.33
GO:0002292	T cell differentiation involved in immune response	biological_process	6/95	53/18668	5.209e-08	1.095e-06	6	GATA3 IL23A RELB IFNG RORC FOXP3	22.25
GO:0032648	regulation of interferon-beta production	biological_process	5/95	45/18668	4.992e-07	7.664e-06	5	LILRB1 RELB TLR8 TLR2 IRF1	21.83
GO:0002821	positive regulation of adaptive immune response	biological_process	6/95	54/18668	5.859e-08	1.189e-06	6	PVR IL23A ADA FCER1A FOXP3 FADD	21.83
GO:0001909	leukocyte mediated cytotoxicity	biological_process	9/95	82/18668	1.094e-10	5.145e-09	9	PVR SLAMF7 LILRB1 IL23A GZMB CTSG TREM1 ULBP2 FADD	21.57
GO:0043367	CD4-positive, alpha-beta T cell differentiation	biological_process	6/95	56/18668	7.365e-08	1.445e-06	6	GATA3 IL23A RELB RORC FOXP3 IFNG	21.05
GO:0032608	interferon-beta production	biological_process	5/95	47/18668	6.308e-07	9.488e-06	5	LILRB1 RELB TLR8 TLR2 IRF1	20.90
GO:0007260	tyrosine phosphorylation of STAT protein	biological_process	7/95	66/18668	9.672e-09	2.449e-07	7	IL23A FLT3 SOCS1 KIT LIF IFNG IL22RA2	20.84
GO:0033628	regulation of cell adhesion mediated by integrin	biological_process	4/95	38/18668	5.457e-06	5.901e-05	4	ADA PLAU CCL21 CXCL13	20.68
GO:0002286	T cell activation involved in immune response	biological_process	9/95	87/18668	1.865e-10	8.248e-09	9	LILRB1 GATA3 IL23A RELB IFNG LGALS3 CD1C RORC FOXP3	20.33
GO:0031343	positive regulation of cell killing	biological_process	4/95	39/18668	6.131e-06	6.511e-05	4	PVR IL23A IFNG FADD	20.15
GO:0004896	cytokine receptor activity	molecular_function	9/95	89/18668	2.290e-10	9.978e-09	9	IL15RA FLT3 CCR3 IL12RB2 CXCR6 IL21R IL11RA IL2RB IL22RA2	19.87
GO:0071622	regulation of granulocyte chemotaxis	biological_process	4/95	40/18668	6.868e-06	7.268e-05	4	IL23A THBS1 CCL21 CXCL1	19.65
GO:0002763	positive regulation of myeloid leukocyte differentiation	biological_process	5/95	50/18668	8.806e-07	1.242e-05	5	IL23A LIF IFNG FADD IL34	19.65
GO:0046632	alpha-beta T cell differentiation	biological_process	8/95	81/18668	2.135e-09	7.029e-08	8	GATA3 IL23A RELB IFNG ADA FOXP3 RORC IRF1	19.41
GO:0046427	positive regulation of JAK-STAT cascade	biological_process	7/95	71/18668	1.637e-08	3.760e-07	7	IL19 FLT3 IL23A SOCS1 KIT IFNG LIF	19.37
GO:0070231	T cell apoptotic process	biological_process	5/95	51/18668	9.800e-07	1.344e-05	5	LGALS3 ADA RAG1 RORC FADD	19.27
GO:0097028	dendritic cell differentiation	biological_process	4/95	41/18668	7.673e-06	7.867e-05	4	LGALS3 LILRB1 FLT3 RELB	19.17
GO:0002687	positive regulation of leukocyte migration	biological_process	10/95	103/18668	4.471e-11	2.245e-09	10	IL23A CXCL10 CXCL1 LGALS3 THBS1 CCL21 CXCL13 CCL20 FADD TLR2	19.08
GO:0035710	CD4-positive, alpha-beta T cell activation	biological_process	6/95	62/18668	1.399e-07	2.591e-06	6	GATA3 IL23A RELB FOXP3 IFNG RORC	19.02
GO:0060338	regulation of type I interferon-mediated signaling pathway	biological_process	4/95	42/18668	8.551e-06	8.618e-05	4	SOCS1 FADD STAT1 NLRC5	18.71
GO:0042531	positive regulation of tyrosine phosphorylation of STAT protein	biological_process	5/95	54/18668	1.335e-06	1.774e-05	5	IL23A FLT3 KIT IFNG LIF	18.19
GO:0042267	natural killer cell mediated cytotoxicity	biological_process	5/95	55/18668	1.474e-06	1.933e-05	5	PVR SLAMF7 LILRB1 GZMB ULBP2	17.86
GO:0030595	leukocyte chemotaxis	biological_process	16/95	179/18668	1.026e-15	1.600e-13	16	S100A8 CCL14 LGALS3 THBS1 CCL21 CXCL13 SAA1 IL23A KIT IFNG CXCL10 CXCL1 TREM1 CCL20 CCL18 CCL25	17.56
GO:0070228	regulation of lymphocyte apoptotic process	biological_process	5/95	56/18668	1.625e-06	2.103e-05	5	LGALS3 ADA RAG1 RORC FADD	17.55
GO:0032649	regulation of interferon-gamma production	biological_process	8/95	90/18668	5.023e-09	1.404e-07	8	GATA3 LILRB1 IL23A IL12RB2 TLR8 CD276 FOXP3 FADD	17.47
GO:0050710	negative regulation of cytokine secretion	biological_process	4/95	45/18668	1.166e-05	1.107e-04	4	FN1 LILRB1 FOXP3 CD34	17.47
GO:0061005	cell differentiation involved in kidney development	biological_process	4/95	46/18668	1.288e-05	1.208e-04	4	GATA3 LIF STAT1 CD34	17.09
GO:0032760	positive regulation of tumor necrosis factor production	biological_process	4/95	46/18668	1.288e-05	1.208e-04	4	IL23A IFNG FADD TLR2	17.09
GO:0002228	natural killer cell mediated immunity	biological_process	5/95	58/18668	1.964e-06	2.487e-05	5	PVR SLAMF7 LILRB1 GZMB ULBP2	16.94
GO:0045582	positive regulation of T cell differentiation	biological_process	6/95	70/18668	3.009e-07	5.009e-06	6	GATA3 IL23A IFNG ADA RAG1 FOXP3	16.84
GO:0071357	cellular response to type I interferon	biological_process	7/95	82/18668	4.629e-08	9.939e-07	7	SOCS1 IFIT1 ISG20 STAT1 FADD NLRC5 IRF1	16.77
GO:0060337	type I interferon signaling pathway	biological_process	7/95	82/18668	4.629e-08	9.939e-07	7	SOCS1 IFIT1 ISG20 STAT1 FADD NLRC5 IRF1	16.77
GO:0032680	regulation of tumor necrosis factor production	biological_process	8/95	96/18668	8.486e-09	2.186e-07	8	LILRB1 IL23A IFNG THBS1 FOXP3 FADD TLR2 CD34	16.38
GO:0034340	response to type I interferon	biological_process	7/95	84/18668	5.509e-08	1.141e-06	7	SOCS1 IFIT1 ISG20 STAT1 FADD NLRC5 IRF1	16.38
GO:0001910	regulation of leukocyte mediated cytotoxicity	biological_process	4/95	48/18668	1.560e-05	1.384e-04	4	PVR LILRB1 IL23A FADD	16.38
GO:0031093	platelet alpha granule lumen	cellular_component	4/95	48/18668	1.560e-05	1.384e-04	4	FN1 APP THBS1 F13A1	16.38
GO:0032640	tumor necrosis factor production	biological_process	8/95	97/18668	9.231e-09	2.358e-07	8	LILRB1 IL23A IFNG THBS1 FOXP3 FADD TLR2 CD34	16.21
GO:0046631	alpha-beta T cell activation	biological_process	9/95	110/18668	1.549e-09	5.337e-08	9	GATA3 LILRB1 IL23A RELB IFNG ADA RORC FOXP3 IRF1	16.08
GO:0002456	T cell mediated immunity	biological_process	6/95	74/18668	4.275e-07	6.702e-06	6	PVR LILRB1 GATA3 IL23A FOXP3 FADD	15.93
GO:0050707	regulation of cytokine secretion	biological_process	11/95	137/18668	4.745e-11	2.343e-09	11	LILRB1 GATA3 TLR8 FN1 FOXP3 TLR2 CD34 SAA1 SOCS1 IFNG CD276	15.78
GO:0032609	interferon-gamma production	biological_process	8/95	100/18668	1.182e-08	2.919e-07	8	GATA3 LILRB1 IL23A IL12RB2 TLR8 CD276 FOXP3 FADD	15.72
GO:0033627	cell adhesion mediated by integrin	biological_process	4/95	50/18668	1.875e-05	1.634e-04	4	ADA PLAU CCL21 CXCL13	15.72
GO:0001776	leukocyte homeostasis	biological_process	6/95	76/18668	5.059e-07	7.727e-06	6	FLT3 IFNG ADA RAG1 FOXP3 FADD	15.51
GO:0000979	RNA polymerase II core promoter sequence-specific DNA binding	molecular_function	4/95	51/18668	2.050e-05	1.776e-04	4	GATA3 TAL1 STAT1 NLRC5	15.41
GO:0002685	regulation of leukocyte migration	biological_process	11/95	142/18668	6.994e-11	3.397e-09	11	LGALS3 THBS1 CCL21 CXCL13 TLR2 IL23A CXCL10 CXCL1 ADA CCL20 FADD	15.22
GO:0009620	response to fungus	biological_process	4/95	52/18668	2.238e-05	1.900e-04	4	S100A8 APP CTSG TLR2	15.12
GO:0002819	regulation of adaptive immune response	biological_process	9/95	118/18668	2.918e-09	8.913e-08	9	PVR LILRB1 IL23A IFNG ADA FCER1A FOXP3 FADD IRF1	14.99
GO:0050663	cytokine secretion	biological_process	12/95	158/18668	1.470e-11	8.711e-10	12	GATA3 LILRB1 TLR8 FN1 FOXP3 TLR2 CD34 SAA1 SOCS1 IFNG CD276 TREM1	14.92
GO:2001238	positive regulation of extrinsic apoptotic signaling pathway	biological_process	4/95	53/18668	2.439e-05	2.059e-04	4	BID THBS1 TNFRSF12A FADD	14.83
GO:0045639	positive regulation of myeloid cell differentiation	biological_process	6/95	80/18668	6.995e-07	1.047e-05	6	IL23A TAL1 LIF IFNG FADD IL34	14.74
GO:0002690	positive regulation of leukocyte chemotaxis	biological_process	6/95	80/18668	6.995e-07	1.047e-05	6	IL23A CXCL10 CXCL1 THBS1 CCL21 CXCL13	14.74
GO:0045580	regulation of T cell differentiation	biological_process	8/95	109/18668	2.380e-08	5.302e-07	8	GATA3 IL23A IFNG SPINK5 ADA RAG1 FOXP3 IRF1	14.42
GO:0060205	cytoplasmic membrane-bounded vesicle lumen	cellular_component	6/95	82/18668	8.176e-07	1.193e-05	6	SAA1 APP F13A1 FN1 ADA THBS1	14.38
GO:0045621	positive regulation of lymphocyte differentiation	biological_process	6/95	82/18668	8.176e-07	1.193e-05	6	GATA3 IL23A IFNG ADA RAG1 FOXP3	14.38
GO:0071346	cellular response to interferon-gamma	biological_process	10/95	137/18668	7.584e-10	2.957e-08	10	CCL14 CCL21 NLRC5 IRF1 SOCS1 IFNG STAT1 CCL20 CCL18 CCL25	14.34
GO:0032623	interleukin-2 production	biological_process	4/95	56/18668	3.127e-05	2.538e-04	4	CD276 GATA3 FOXP3 CD34	14.04
GO:0002367	cytokine production involved in immune response	biological_process	5/95	70/18668	5.438e-06	5.902e-05	5	LILRB1 KIT TREM1 FOXP3 TLR2	14.04
GO:0050715	positive regulation of cytokine secretion	biological_process	6/95	85/18668	1.026e-06	1.388e-05	6	GATA3 SAA1 IFNG CD276 TLR2 CD34	13.87
GO:0060326	cell chemotaxis	biological_process	16/95	227/18668	3.902e-14	4.129e-12	16	S100A8 CCL14 LGALS3 THBS1 CCL21 CXCL13 SAA1 IL23A KIT IFNG CXCL10 CXCL1 TREM1 CCL20 CCL18 CCL25	13.85
GO:0016525	negative regulation of angiogenesis	biological_process	5/95	71/18668	5.872e-06	6.327e-05	5	LIF CXCL10 STAT1 SPINK5 THBS1	13.84
GO:0050900	leukocyte migration	biological_process	24/95	344/18668	6.416e-20	2.112e-17	24	S100A8 GATA3 CEACAM1 CEACAM6 CCL14 THBS1 CCL21 CXCL13 TLR2 IL23A KIT CXCL10 CXCL1 ADA TREM1 FADD CCL18 CCL25 FN1 LGALS3 CD34 SAA1 IFNG CCL20	13.71
GO:0050868	negative regulation of T cell activation	biological_process	6/95	89/18668	1.371e-06	1.805e-05	6	LILRB1 LGALS3 CD276 TIGIT FOXP3 IRF1	13.25
GO:0033077	T cell differentiation in thymus	biological_process	5/95	75/18668	7.900e-06	8.072e-05	5	GATA3 ADA RAG1 FOXP3 FADD	13.10
GO:0045619	regulation of lymphocyte differentiation	biological_process	9/95	136/18668	1.048e-08	2.632e-07	9	GATA3 SPINK5 FOXP3 IRF1 IL23A FLT3 IFNG ADA RAG1	13.00
GO:0050709	negative regulation of protein secretion	biological_process	4/95	62/18668	4.950e-05	3.829e-04	4	FN1 LILRB1 FOXP3 CD34	12.68
GO:0050729	positive regulation of inflammatory response	biological_process	6/95	93/18668	1.810e-06	2.302e-05	6	S100A8 IL23A CCL14 FCER1A TLR2 CCL18	12.68
GO:0002761	regulation of myeloid leukocyte differentiation	biological_process	7/95	109/18668	3.608e-07	5.842e-06	7	LILRB1 IL23A TAL1 LIF IFNG FADD IL34	12.62
GO:0005125	cytokine activity	molecular_function	14/95	218/18668	4.090e-12	2.754e-10	14	LIF CCL14 TNFRSF11B CCL21 CXCL13 IL34 IL19 IL23A IFNG CXCL10 CXCL1 CCL20 CCL18 CCL25	12.62
GO:0034341	response to interferon-gamma	biological_process	10/95	157/18668	2.920e-09	8.829e-08	10	CCL14 CCL21 NLRC5 IRF1 SOCS1 IFNG STAT1 CCL20 CCL18 CCL25	12.52
GO:0001818	negative regulation of cytokine production	biological_process	11/95	173/18668	5.895e-10	2.329e-08	11	GATA3 LILRB1 RELB THBS1 FOXP3 TLR2 NLRC5 CD34 IL23A IFNG TIGIT	12.49
GO:0034774	secretory granule lumen	cellular_component	4/95	63/18668	5.320e-05	4.094e-04	4	FN1 APP THBS1 F13A1	12.48
GO:0002260	lymphocyte homeostasis	biological_process	4/95	63/18668	5.320e-05	4.094e-04	4	ADA RAG1 FOXP3 FADD	12.48
GO:0031091	platelet alpha granule	cellular_component	4/95	63/18668	5.320e-05	4.094e-04	4	FN1 APP THBS1 F13A1	12.48
GO:0009897	external side of plasma membrane	cellular_component	16/95	255/18668	2.298e-13	2.003e-11	16	LILRB1 IL12RB2 LGALS3 C7 THBS1 TLR2 CD34 FLT3 KIT IFNG CXCL10 CD276 ICOS ADA FCER1A IL2RB	12.33
GO:0030217	T cell differentiation	biological_process	13/95	208/18668	2.903e-11	1.564e-09	13	GATA3 RELB SPINK5 FOXP3 IRF1 IL23A FLT3 KIT IFNG ADA RAG1 RORC FADD	12.28
GO:0050728	negative regulation of inflammatory response	biological_process	6/95	97/18668	2.359e-06	2.925e-05	6	GATA3 SAA1 CD276 ADA FOXP3 IL22RA2	12.15
GO:0019955	cytokine binding	molecular_function	5/95	82/18668	1.280e-05	1.204e-04	5	KIT CXCR6 THBS1 IL2RB IL22RA2	11.98
GO:0071347	cellular response to interleukin-1	biological_process	5/95	83/18668	1.367e-05	1.262e-04	5	CCL14 CCL21 CCL20 CCL18 CCL25	11.84
GO:0046425	regulation of JAK-STAT cascade	biological_process	8/95	135/18668	1.345e-07	2.506e-06	8	LIF IL22RA2 IL19 FLT3 IL23A SOCS1 KIT IFNG	11.64
GO:0005126	cytokine receptor binding	molecular_function	16/95	271/18668	5.791e-13	4.766e-11	16	GATA3 LIF CCL14 CCL21 CXCL13 BID IL23A CXCL10 STAT1 CXCL1 FADD CCL18 CCL25 IL34 IFNG CCL20	11.60
GO:0030193	regulation of blood coagulation	biological_process	5/95	85/18668	1.554e-05	1.387e-04	5	PLAU SERPINB2 THBS1 PLAUR CD34	11.56
GO:0042102	positive regulation of T cell proliferation	biological_process	5/95	85/18668	1.554e-05	1.387e-04	5	IL23A IFNG CD276 FOXP3 FADD	11.56
GO:0002460	adaptive immune response based on somatic recombination of immune receptors built from immunoglobulin superfamily domains	biological_process	14/95	239/18668	1.405e-11	8.496e-10	14	LILRB1 GATA3 RELB TLR8 C7 FOXP3 CXCL13 PVR IL23A IFNG ADA FCER1A RORC FADD	11.51
GO:0002366	leukocyte activation involved in immune response	biological_process	12/95	207/18668	3.437e-10	1.414e-08	12	GATA3 LILRB1 RELB LGALS3 CD1C FOXP3 IL23A KIT IFNG ADA FCER1A RORC	11.39
GO:0060333	interferon-gamma-mediated signaling pathway	biological_process	5/95	87/18668	1.762e-05	1.554e-04	5	SOCS1 IFNG STAT1 NLRC5 IRF1	11.29
GO:0002263	cell activation involved in immune response	biological_process	12/95	209/18668	3.843e-10	1.560e-08	12	LILRB1 GATA3 RELB LGALS3 CD1C FOXP3 IL23A KIT IFNG ADA FCER1A RORC	11.28
GO:0042129	regulation of T cell proliferation	biological_process	8/95	140/18668	1.803e-07	3.161e-06	8	LILRB1 LGALS3 FOXP3 IRF1 IL23A IFNG CD276 FADD	11.23
GO:0051250	negative regulation of lymphocyte activation	biological_process	7/95	124/18668	9.110e-07	1.279e-05	7	LILRB1 FLT3 LGALS3 TIGIT CD276 FOXP3 IRF1	11.09
GO:0050870	positive regulation of T cell activation	biological_process	11/95	195/18668	2.131e-09	7.095e-08	11	LILRB1 GATA3 CCL21 FOXP3 IL23A IFNG CD276 ICOS ADA RAG1 FADD	11.08
GO:0072073	kidney epithelium development	biological_process	4/95	72/18668	9.711e-05	6.661e-04	4	GATA3 LIF STAT1 CD34	10.92
GO:0002443	leukocyte mediated immunity	biological_process	17/95	308/18668	3.655e-13	3.094e-11	17	GATA3 ULBP2 FOXP3 TLR2 IL23A KIT TREM1 FCER1A FADD LILRB1 SLAMF7 GZMB TLR8 C7 PVR IFNG CTSG	10.85
GO:0002526	acute inflammatory response	biological_process	7/95	127/18668	1.081e-06	1.449e-05	7	GATA3 S100A8 SAA1 CFP FN1 FCER1A DEFB1	10.83
GO:0002573	myeloid leukocyte differentiation	biological_process	10/95	184/18668	1.392e-08	3.353e-07	10	GATA3 LILRB1 RELB LIF IL34 IL23A TAL1 KIT IFNG FADD	10.68
GO:0050708	regulation of protein secretion	biological_process	11/95	206/18668	3.833e-09	1.103e-07	11	LILRB1 GATA3 TLR8 FN1 FOXP3 TLR2 CD34 SAA1 SOCS1 IFNG CD276	10.49
GO:0050863	regulation of T cell activation	biological_process	15/95	281/18668	1.135e-11	7.006e-10	15	GATA3 CCL21 FOXP3 IRF1 IL23A CD276 TIGIT ICOS ADA RAG1 FADD LILRB1 LGALS3 SPINK5 IFNG	10.49
GO:0007259	JAK-STAT cascade	biological_process	9/95	169/18668	7.335e-08	1.449e-06	9	LIF IL22RA2 IL19 IL23A FLT3 SOCS1 KIT IFNG STAT1	10.46
GO:0002250	adaptive immune response	biological_process	19/95	364/18668	5.115e-14	5.226e-12	19	GATA3 CD1A FOXP3 CXCL13 IRF1 IL23A ADA FCER1A RAG1 RORC FADD LILRB1 RELB TLR8 CD1C C7 PVR IFNG CTSL	10.26
GO:0050830	defense response to Gram-positive bacterium	biological_process	4/95	77/18668	1.313e-04	8.626e-04	4	APP CTSG DEFB1 TLR2	10.21
GO:0030101	natural killer cell activation	biological_process	4/95	77/18668	1.313e-04	8.626e-04	4	SLAMF7 IL23A IL21R ULBP2	10.21
GO:0050671	positive regulation of lymphocyte proliferation	biological_process	6/95	116/18668	7.255e-06	7.623e-05	6	IL23A IFNG CD276 ADA FOXP3 FADD	10.16
GO:0050921	positive regulation of chemotaxis	biological_process	6/95	116/18668	7.255e-06	7.623e-05	6	IL23A CXCL10 CXCL1 THBS1 CCL21 CXCL13	10.16
GO:0045765	regulation of angiogenesis	biological_process	10/95	194/18668	2.337e-08	5.246e-07	10	LIF SPINK5 THBS1 TNFRSF12A CXCL13 CD34 CCR3 CMA1 CXCL10 STAT1	10.13
GO:0032946	positive regulation of mononuclear cell proliferation	biological_process	6/95	117/18668	7.655e-06	7.876e-05	6	IL23A IFNG CD276 ADA FOXP3 FADD	10.08
GO:0050727	regulation of inflammatory response	biological_process	14/95	273/18668	8.281e-11	3.958e-09	14	S100A8 GATA3 CCL14 FOXP3 TLR2 IL22RA2 IL23A CMA1 CD276 ADA FCER1A CCL18 SAA1 CFP	10.08
GO:0061041	regulation of wound healing	biological_process	6/95	119/18668	8.511e-06	8.607e-05	6	PLAU SERPINB2 THBS1 TNFRSF12A PLAUR CD34	9.91
GO:0019221	cytokine-mediated signaling pathway	biological_process	30/95	599/18668	2.510e-20	1.062e-17	30	IL15RA IL12RB2 CCL14 TNFRSF11B IL22RA2 CCR3 CXCL10 IL21R CCL18 CXCR6 NLRC5 IFNG C6 CCL21 TNFRSF12A CXCL13 IRF1 FLT3 IFIT1 KIT ISG20 STAT1 CXCL1 FADD CCL25 RELB SOCS1 IL11RA CCL20 IL2RB	9.84
GO:0071222	cellular response to lipopolysaccharide	biological_process	7/95	140/18668	2.169e-06	2.735e-05	7	LILRB1 TLR2 PLAU IFNG CXCL10 STAT1 CCL20	9.83
GO:0006954	inflammatory response	biological_process	31/95	626/18668	8.645e-21	5.123e-18	31	CCL14 TNFRSF11B IL22RA2 IL23A CCR3 CMA1 CXCL10 CD276 ADA FCER1A CCL18 TLR8 CXCR6 IL34 S100A8 GATA3 THBS1 CCL21 FOXP3 CXCL13 TLR2 IL19 KIT CXCL1 DEFB1 CCL25 RELB FN1 SAA1 CFP CCL20	9.73
GO:0032479	regulation of type I interferon production	biological_process	6/95	122/18668	9.944e-06	9.756e-05	6	LILRB1 RELB TLR8 TLR2 NLRC5 IRF1	9.66
GO:0042742	defense response to bacterium	biological_process	12/95	247/18668	2.646e-09	8.522e-08	12	S100A8 C7 CXCL13 TLR2 IL23A APP CTSG IFNG CFP TREM1 CCL20 DEFB1	9.55
GO:0002695	negative regulation of leukocyte activation	biological_process	7/95	144/18668	2.651e-06	3.193e-05	7	LILRB1 LGALS3 FOXP3 IRF1 FLT3 TIGIT CD276	9.55
GO:0032606	type I interferon production	biological_process	6/95	124/18668	1.101e-05	1.056e-04	6	LILRB1 RELB TLR8 TLR2 NLRC5 IRF1	9.51
GO:0071356	cellular response to tumor necrosis factor	biological_process	12/95	249/18668	2.902e-09	8.957e-08	12	GATA3 C6 RELB CCL14 TNFRSF11B CCL21 TNFRSF12A STAT1 CCL20 FADD CCL18 CCL25	9.47
GO:0071219	cellular response to molecule of bacterial origin	biological_process	7/95	147/18668	3.069e-06	3.623e-05	7	LILRB1 TLR2 PLAU IFNG CXCL10 STAT1 CCL20	9.36
GO:0008625	extrinsic apoptotic signaling pathway via death domain receptors	biological_process	4/95	84/18668	1.940e-04	1.087e-03	4	BID LGALS3 THBS1 FADD	9.36
GO:1901342	regulation of vasculature development	biological_process	10/95	213/18668	5.809e-08	1.187e-06	10	LIF SPINK5 THBS1 TNFRSF12A CXCL13 CD34 CCR3 CMA1 CXCL10 STAT1	9.23
GO:0008037	cell recognition	biological_process	7/95	149/18668	3.379e-06	3.911e-05	7	LGALS3 C7 CCL21 PVR APP TIGIT COLEC12	9.23
GO:2001235	positive regulation of apoptotic signaling pathway	biological_process	6/95	128/18668	1.341e-05	1.242e-04	6	S100A8 THBS1 TNFRSF12A IL19 BID FADD	9.21
GO:0032496	response to lipopolysaccharide	biological_process	14/95	299/18668	2.762e-10	1.186e-08	14	S100A8 IL12RB2 TNFRSF11B CXCL13 TLR2 PLAU CXCL10 STAT1 CXCL1 LILRB1 SOCS1 CTSG IFNG CCL20	9.20
GO:0050867	positive regulation of cell activation	biological_process	14/95	299/18668	2.762e-10	1.186e-08	14	GATA3 THBS1 CCL21 FOXP3 IL23A CD276 ICOS ADA FCER1A RAG1 FADD LILRB1 C7 IFNG	9.20
GO:0070555	response to interleukin-1	biological_process	5/95	108/18668	5.631e-05	4.213e-04	5	CCL14 CCL21 CCL20 CCL18 CCL25	9.10
GO:0042098	T cell proliferation	biological_process	8/95	173/18668	9.833e-07	1.343e-05	8	LILRB1 LGALS3 FOXP3 IRF1 IL23A IFNG CD276 FADD	9.09
GO:0001952	regulation of cell-matrix adhesion	biological_process	4/95	87/18668	2.270e-04	1.248e-03	4	PLAU THBS1 CCL21 CCL25	9.03
GO:0002576	platelet degranulation	biological_process	4/95	87/18668	2.270e-04	1.248e-03	4	APP F13A1 FN1 THBS1	9.03
GO:0009306	protein secretion	biological_process	12/95	262/18668	5.200e-09	1.440e-07	12	GATA3 FOXP3 TLR2 CD276 TREM1 LILRB1 TLR8 FN1 CD34 SAA1 SOCS1 IFNG	9.00
GO:0050714	positive regulation of protein secretion	biological_process	6/95	131/18668	1.549e-05	1.387e-04	6	GATA3 TLR2 CD34 SAA1 IFNG CD276	9.00
GO:0042110	T cell activation	biological_process	20/95	437/18668	1.394e-13	1.252e-11	20	GATA3 CCL21 FOXP3 IRF1 IL23A FLT3 KIT TIGIT CD276 ICOS ADA RAG1 RORC FADD LILRB1 RELB LGALS3 CD1C SPINK5 IFNG	8.99
GO:0008201	heparin binding	molecular_function	7/95	154/18668	4.270e-06	4.848e-05	7	FN1 THBS1 CXCL13 SAA1 APP CTSG CXCL10	8.93
GO:0002237	response to molecule of bacterial origin	biological_process	14/95	311/18668	4.639e-10	1.857e-08	14	S100A8 IL12RB2 TNFRSF11B CXCL13 TLR2 PLAU CXCL10 STAT1 CXCL1 LILRB1 SOCS1 IFNG CTSG CCL20	8.85
GO:0003823	antigen binding	molecular_function	5/95	112/18668	6.839e-05	5.003e-04	5	CD1C C7 CD1A ULBP2 KLRC1	8.77
GO:0034612	response to tumor necrosis factor	biological_process	12/95	270/18668	7.332e-09	1.906e-07	12	GATA3 C6 CCL14 TNFRSF11B CCL21 TNFRSF12A STAT1 FADD CCL18 CCL25 RELB CCL20	8.73
GO:2000027	regulation of organ morphogenesis	biological_process	7/95	159/18668	5.354e-06	5.832e-05	7	GATA3 LIF TNFRSF11B CD34 PLAU IFNG STAT1	8.65
GO:0043154	negative regulation of cysteine-type endopeptidase activity involved in apoptotic process	biological_process	4/95	91/18668	2.774e-04	1.457e-03	4	THBS1 RAG1 PLAUR FADD	8.64
GO:0001656	metanephros development	biological_process	4/95	91/18668	2.774e-04	1.457e-03	4	GATA3 LIF STAT1 CD34	8.64
GO:0048520	positive regulation of behavior	biological_process	6/95	137/18668	2.046e-05	1.778e-04	6	THBS1 CCL21 CXCL13 IL23A CXCL10 CXCL1	8.61
GO:0050730	regulation of peptidyl-tyrosine phosphorylation	biological_process	9/95	206/18668	4.238e-07	6.679e-06	9	LIF IL22RA2 IL23A FLT3 APP SOCS1 KIT IFNG FCER1A	8.59
GO:0051249	regulation of lymphocyte activation	biological_process	17/95	390/18668	1.544e-11	8.970e-10	17	GATA3 CCL21 FOXP3 IRF1 IL23A FLT3 TIGIT CD276 ICOS ADA RAG1 FADD LILRB1 LGALS3 C7 SPINK5 IFNG	8.57
GO:0006959	humoral immune response	biological_process	9/95	207/18668	4.422e-07	6.896e-06	9	GATA3 C7 CXCL13 APP POU2AF1 IFNG CFP TREM1 DEFB1	8.54
GO:0030098	lymphocyte differentiation	biological_process	13/95	305/18668	3.347e-09	9.917e-08	13	GATA3 FOXP3 IRF1 FLT3 IL23A KIT ADA RAG1 RORC FADD RELB SPINK5 IFNG	8.38
GO:0001046	core promoter sequence-specific DNA binding	molecular_function	4/95	94/18668	3.206e-04	1.505e-03	4	GATA3 TAL1 STAT1 NLRC5	8.36
GO:2000117	negative regulation of cysteine-type endopeptidase activity	biological_process	4/95	94/18668	3.206e-04	1.505e-03	4	THBS1 RAG1 PLAUR FADD	8.36
GO:0019882	antigen processing and presentation	biological_process	10/95	235/18668	1.505e-07	2.770e-06	10	C6 RELB CD1C THBS1 CD1A CCL21 ULBP2 IFNG CTSL ABCB1	8.36
GO:0071345	cellular response to cytokine stimulus	biological_process	31/95	735/18668	7.634e-19	2.262e-16	31	IL15RA IL12RB2 CCL14 TNFRSF11B IL22RA2 CCR3 CXCL10 IL21R CCL18 CXCR6 NLRC5 IFNG GATA3 C6 CCL21 TNFRSF12A CXCL13 IRF1 FLT3 IFIT1 KIT ISG20 STAT1 CXCL1 FADD CCL25 RELB SOCS1 IL11RA CCL20 IL2RB	8.29
GO:0001816	cytokine production	biological_process	26/95	623/18668	4.708e-16	8.206e-14	26	IL12RB2 IL23A CMA1 TIGIT CD276 FCER1A LILRB1 TLR8 NLRC5 CD34 IFNG S100A8 GATA3 THBS1 FOXP3 TLR2 IRF1 IL19 KIT TREM1 FADD RELB FN1 SAA1 SOCS1 CCL20	8.20
GO:0002683	negative regulation of immune system process	biological_process	11/95	266/18668	5.737e-08	1.180e-06	11	THBS1 FOXP3 IRF1 FLT3 IFIT1 CD276 TIGIT ADA LILRB1 LGALS3 SPINK5	8.13
GO:0001047	core promoter binding	molecular_function	6/95	146/18668	3.033e-05	2.517e-04	6	GATA3 RELB FOXP3 NLRC5 TAL1 STAT1	8.08
GO:0070661	leukocyte proliferation	biological_process	11/95	268/18668	6.205e-08	1.242e-06	11	FOXP3 IRF1 IL23A FLT3 KIT CD276 ADA FADD LILRB1 LGALS3 IFNG	8.07
GO:0048872	homeostasis of number of cells	biological_process	9/95	221/18668	7.852e-07	1.157e-05	9	GATA3 FOXP3 FLT3 TAL1 KIT IFNG ADA RAG1 FADD	8.00
GO:0002262	myeloid cell homeostasis	biological_process	5/95	123/18668	1.126e-04	7.635e-04	5	GATA3 TAL1 KIT IFNG FOXP3	7.99
GO:0072006	nephron development	biological_process	4/95	99/18668	4.037e-04	1.843e-03	4	GATA3 LIF STAT1 CD34	7.94
GO:0032635	interleukin-6 production	biological_process	4/95	100/18668	4.221e-04	1.921e-03	4	IL19 IFNG FOXP3 TLR2	7.86
GO:0050865	regulation of cell activation	biological_process	19/95	476/18668	5.597e-12	3.528e-10	19	GATA3 THBS1 CCL21 FOXP3 IRF1 FLT3 IL23A TIGIT CD276 ICOS ADA FCER1A RAG1 FADD LILRB1 LGALS3 C7 SPINK5 IFNG	7.84
GO:0005539	glycosaminoglycan binding	molecular_function	8/95	202/18668	3.356e-06	3.900e-05	8	FN1 THBS1 CXCL13 TLR2 SAA1 APP CTSG CXCL10	7.78
GO:2000147	positive regulation of cell motility	biological_process	15/95	380/18668	7.857e-10	2.985e-08	15	GATA3 THBS1 CCL21 CXCL13 TLR2 IL23A PLAU KIT CXCL10 CXCL1 FADD EPCAM LGALS3 IFNG CCL20	7.76
GO:0050731	positive regulation of peptidyl-tyrosine phosphorylation	biological_process	6/95	152/18668	3.888e-05	3.130e-04	6	LIF IL23A FLT3 KIT IFNG FCER1A	7.76
GO:0046651	lymphocyte proliferation	biological_process	10/95	254/18668	3.176e-07	5.257e-06	10	LILRB1 LGALS3 FOXP3 IRF1 IL23A FLT3 IFNG CD276 ADA FADD	7.74
GO:0002521	leukocyte differentiation	biological_process	18/95	457/18668	2.303e-11	1.312e-09	18	GATA3 LIF FOXP3 IRF1 FLT3 IL23A KIT ADA RAG1 RORC FADD LILRB1 RELB LGALS3 SPINK5 IL34 TAL1 IFNG	7.74
GO:0032943	mononuclear cell proliferation	biological_process	10/95	256/18668	3.424e-07	5.605e-06	10	FOXP3 IRF1 IL23A FLT3 CD276 ADA FADD LILRB1 LGALS3 IFNG	7.68
GO:0051272	positive regulation of cellular component movement	biological_process	15/95	385/18668	9.415e-10	3.487e-08	15	GATA3 THBS1 CCL21 CXCL13 TLR2 IL23A PLAU KIT CXCL10 CXCL1 FADD EPCAM LGALS3 IFNG CCL20	7.66
GO:2001236	regulation of extrinsic apoptotic signaling pathway	biological_process	6/95	156/18668	4.561e-05	3.575e-04	6	LGALS3 THBS1 TNFRSF12A IL19 BID FADD	7.56
GO:0016064	immunoglobulin mediated immune response	biological_process	5/95	130/18668	1.510e-04	9.705e-04	5	TLR8 C7 FOXP3 IFNG FCER1A	7.56
GO:0002224	toll-like receptor signaling pathway	biological_process	6/95	156/18668	4.561e-05	3.575e-04	6	TLR8 TLR2 IRF1 FADD CTSL COLEC12	7.56
GO:0046649	lymphocyte activation	biological_process	24/95	624/18668	3.194e-14	3.505e-12	24	ULBP2 IL23A TIGIT CD276 ICOS IL21R ADA RAG1 RORC LILRB1 LGALS3 CD1C IFNG GATA3 CCL21 FOXP3 IRF1 FLT3 KIT FADD SLAMF7 RELB C7 SPINK5	7.56
GO:0045637	regulation of myeloid cell differentiation	biological_process	7/95	182/18668	1.385e-05	1.274e-04	7	LILRB1 LIF IL34 IL23A TAL1 IFNG FADD	7.56
GO:0030335	positive regulation of cell migration	biological_process	14/95	370/18668	4.478e-09	1.264e-07	14	GATA3 THBS1 CCL21 CXCL13 TLR2 IL23A PLAU KIT CXCL10 CXCL1 FADD LGALS3 IFNG CCL20	7.44
GO:0009617	response to bacterium	biological_process	20/95	528/18668	4.371e-12	2.815e-10	20	IL12RB2 TNFRSF11B IL23A APP CXCL10 LILRB1 IFNG CTSG S100A8 CXCL13 TLR2 PLAU STAT1 CXCL1 TREM1 DEFB1 C7 SOCS1 CFP CCL20	7.44
GO:0040017	positive regulation of locomotion	biological_process	15/95	397/18668	1.438e-09	5.072e-08	15	GATA3 THBS1 CCL21 CXCL13 TLR2 IL23A PLAU KIT CXCL10 CXCL1 FADD EPCAM LGALS3 IFNG CCL20	7.42
GO:0001959	regulation of cytokine-mediated signaling pathway	biological_process	5/95	133/18668	1.703e-04	9.667e-04	5	NLRC5 SOCS1 IFNG STAT1 FADD	7.39
GO:0019724	B cell mediated immunity	biological_process	5/95	133/18668	1.703e-04	9.667e-04	5	TLR8 C7 FOXP3 IFNG FCER1A	7.39
GO:0001817	regulation of cytokine production	biological_process	21/95	561/18668	1.732e-12	1.283e-10	21	IL12RB2 IL23A CD276 TIGIT FCER1A LILRB1 TLR8 NLRC5 CD34 IFNG GATA3 THBS1 FOXP3 TLR2 IRF1 FADD RELB FN1 SAA1 SOCS1 CCL20	7.36
GO:0001819	positive regulation of cytokine production	biological_process	12/95	322/18668	5.384e-08	1.123e-06	12	GATA3 IL12RB2 THBS1 FOXP3 TLR2 IRF1 IL23A TIGIT FADD CD34 SAA1 IFNG	7.32
GO:0034097	response to cytokine	biological_process	31/95	832/18668	2.310e-17	5.704e-15	31	IL15RA IL12RB2 CCL14 TNFRSF11B IL22RA2 CCR3 CXCL10 IL21R CCL18 CXCR6 NLRC5 IFNG GATA3 C6 CCL21 TNFRSF12A CXCL13 IRF1 FLT3 IFIT1 KIT ISG20 STAT1 CXCL1 FADD CCL25 RELB SOCS1 IL11RA CCL20 IL2RB	7.32
GO:0045321	leukocyte activation	biological_process	27/95	727/18668	2.288e-15	3.390e-13	27	ULBP2 IL23A TIGIT CD276 ICOS IL21R ADA FCER1A RAG1 RORC LILRB1 TLR8 LGALS3 CD1C IFNG GATA3 THBS1 CCL21 FOXP3 IRF1 FLT3 KIT FADD SLAMF7 RELB C7 SPINK5	7.30
GO:0045766	positive regulation of angiogenesis	biological_process	4/95	108/18668	5.935e-04	2.409e-03	4	CCR3 CMA1 THBS1 CD34	7.28
GO:0033209	tumor necrosis factor-mediated signaling pathway	biological_process	6/95	163/18668	5.969e-05	4.444e-04	6	C6 RELB TNFRSF11B TNFRSF12A STAT1 FADD	7.23
GO:0051607	defense response to virus	biological_process	12/95	327/18668	6.399e-08	1.272e-06	12	IRF1 IL23A IFIT1 ISG20 CXCL10 STAT1 TREM1 FADD LILRB1 TLR8 NLRC5 IFNG	7.21
GO:0006955	immune response	biological_process	62/95	1711/18668	7.483e-32	2.217e-28	62	CCL14 ULBP2 CXCL10 CD276 FCER1A RAG1 RORC GZMB TLR8 LGALS3 NLRC5 IFNG CTSG LIF THBS1 CD1A FOXP3 CXCL13 IL19 KIT ISG20 CXCL1 TREM1 FADD ICAM4 C7 SPINK5 SOCS1 POU2AF1 CTSL TNFRSF11B IL23A APP CMA1 ICOS ADA CCL18 LILRB1 CD1C S100B KLRC1 CD34 IL34 GATA3 S100A8 C6 CCL21 TLR2 IRF1 IFIT1 STAT1 DEFB1 CCL25 SLAMF7 RELB PVR SAA1 LAIR2 CFP CCL20 IL2RB COLEC12	7.12
GO:0030183	B cell differentiation	biological_process	4/95	111/18668	6.697e-04	2.685e-03	4	FLT3 KIT ADA RAG1	7.08
GO:0001664	G-protein coupled receptor binding	molecular_function	9/95	250/18668	2.295e-06	2.857e-05	9	CCL14 CCL21 CXCL13 SAA1 CXCL10 CXCL1 CCL20 CCL18 CCL25	7.07
GO:0001935	endothelial cell proliferation	biological_process	4/95	112/18668	6.967e-04	2.760e-03	4	CCR3 STAT1 THBS1 CD34	7.02
GO:0009986	cell surface	cellular_component	25/95	707/18668	6.477e-14	6.191e-12	25	IL12RB2 ULBP2 APP CXCL10 TIGIT CD276 ICOS ADA FCER1A LILRB1 LGALS3 CD34 CTSG IFNG THBS1 TNFRSF12A TLR2 FLT3 PLAU KIT ABCB1 EPCAM C7 PVR IL2RB	6.95
GO:0045088	regulation of innate immune response	biological_process	14/95	400/18668	1.222e-08	2.992e-07	14	C6 TLR2 IRF1 STAT1 FADD LILRB1 RELB TLR8 NLRC5 PVR SOCS1 IFNG CTSL COLEC12	6.88
GO:0030856	regulation of epithelial cell differentiation	biological_process	4/95	115/18668	7.826e-04	2.863e-03	4	GATA3 IFNG LIF STAT1	6.83
GO:0002684	positive regulation of immune system process	biological_process	30/95	863/18668	4.439e-16	8.220e-14	30	IL23A CXCL10 CD276 ICOS ADA FCER1A RAG1 LILRB1 TLR8 LGALS3 CTSG IFNG GATA3 C6 THBS1 CCL21 FOXP3 CXCL13 TLR2 IRF1 CXCL1 FADD ABCB1 RELB C7 PVR CFP CCL20 CTSL COLEC12	6.83
GO:0009615	response to virus	biological_process	14/95	406/18668	1.479e-08	3.478e-07	14	GATA3 FOXP3 IRF1 IL23A IFIT1 ISG20 CXCL10 STAT1 TREM1 FADD LILRB1 TLR8 NLRC5 IFNG	6.78
GO:0045087	innate immune response	biological_process	39/95	1133/18668	4.111e-20	1.523e-17	39	CCL14 ULBP2 FCER1A GZMB TLR8 LGALS3 NLRC5 IFNG KIT ISG20 TREM1 FADD C7 SOCS1 CTSL IL23A APP CCL18 LILRB1 S100B IL34 S100A8 GATA3 C6 CCL21 TLR2 IRF1 IFIT1 STAT1 DEFB1 CCL25 SLAMF7 RELB PVR SAA1 CFP CCL20 IL2RB COLEC12	6.76
GO:0001525	angiogenesis	biological_process	14/95	408/18668	1.575e-08	3.675e-07	14	CEACAM1 LIF THBS1 TNFRSF12A CXCL13 PLAU CCR3 CMA1 CXCL10 STAT1 FN1 SPINK5 CD34 TAL1	6.74
GO:0050920	regulation of chemotaxis	biological_process	6/95	176/18668	9.530e-05	6.552e-04	6	THBS1 CCL21 CXCL13 IL23A CXCL10 CXCL1	6.70
GO:0050776	regulation of immune response	biological_process	34/95	1018/18668	2.002e-17	5.393e-15	34	IL23A CD276 ADA FCER1A LILRB1 TLR8 LGALS3 KLRC1 NLRC5 CD34 CTSG IFNG GATA3 C6 FOXP3 CXCL13 TLR2 IRF1 KIT STAT1 TREM1 FADD ICAM4 SLAMF7 RELB C7 SPINK5 PVR SOCS1 LAIR2 CFP IL2RB CTSL COLEC12	6.56
GO:0001775	cell activation	biological_process	32/95	960/18668	1.678e-16	3.825e-14	32	ULBP2 IL23A APP CXCL10 TIGIT CD276 IL21R ICOS ADA FCER1A RAG1 RORC LILRB1 TLR8 LGALS3 CD1C IFNG GATA3 THBS1 CCL21 FOXP3 IRF1 FLT3 KIT FADD SLAMF7 RELB FN1 C7 SPINK5 SAA1 F13A1	6.55
GO:0010952	positive regulation of peptidase activity	biological_process	5/95	156/18668	3.928e-04	1.796e-03	5	S100A8 FN1 BID APP FADD	6.30
GO:0009611	response to wounding	biological_process	42/95	1312/18668	2.343e-20	1.157e-17	42	CEACAM1 CCL14 IL22RA2 CXCL10 CD276 FCER1A TLR8 PLAUR THBS1 FOXP3 CXCL13 IL19 KIT CXCL1 TREM1 SERPINB2 TNFRSF11B IL23A APP CCR3 CMA1 ADA CCL18 CXCR6 CD34 IL34 S100A8 GATA3 CEACAM6 CCL21 TNFRSF12A TLR2 IRF1 PLAU DEFB1 CCL25 RELB FN1 SAA1 F13A1 CFP CCL20	6.29
GO:0031638	zymogen activation	biological_process	4/95	125/18668	1.128e-03	3.726e-03	4	S100A8 BID THBS1 FADD	6.29
GO:0009607	response to biotic stimulus	biological_process	30/95	940/18668	4.115e-15	5.542e-13	30	IL12RB2 TNFRSF11B IL23A APP CXCL10 CCL18 LILRB1 TLR8 NLRC5 IFNG CTSG GATA3 S100A8 FOXP3 CXCL13 TLR2 IRF1 PLAU IFIT1 ISG20 STAT1 CXCL1 TREM1 DEFB1 FADD C7 PVR SOCS1 CFP CCL20	6.27
GO:0002221	pattern recognition receptor signaling pathway	biological_process	6/95	190/18668	1.514e-04	9.710e-04	6	TLR8 TLR2 IRF1 FADD CTSL COLEC12	6.21
GO:0051048	negative regulation of secretion	biological_process	6/95	190/18668	1.514e-04	9.710e-04	6	LILRB1 LIF FN1 FOXP3 CD34 ADA	6.21
GO:0002682	regulation of immune system process	biological_process	48/95	1530/18668	1.342e-22	9.941e-20	48	CXCL10 TIGIT CD276 FCER1A RAG1 TLR8 LGALS3 NLRC5 CTSG IFNG LIF THBS1 FOXP3 CXCL13 FLT3 KIT CXCL1 TREM1 FADD ICAM4 ABCB1 C7 SPINK5 TAL1 SOCS1 CTSL IL23A ICOS ADA LILRB1 KLRC1 CD34 IL34 GATA3 C6 CCL21 TLR2 IRF1 IFIT1 STAT1 SLAMF7 RELB PVR LAIR2 CFP CCL20 IL2RB COLEC12	6.16
GO:0007249	I-kappaB kinase/NF-kappaB signaling	biological_process	8/95	256/18668	2.119e-05	1.830e-04	8	RELB TLR8 CCL21 S100B TLR2 IL23A STAT1 FADD	6.14
GO:0051707	response to other organism	biological_process	28/95	905/18668	6.440e-14	6.361e-12	28	IL12RB2 TNFRSF11B IL23A APP CXCL10 LILRB1 TLR8 NLRC5 CTSG IFNG S100A8 GATA3 FOXP3 CXCL13 TLR2 IRF1 PLAU IFIT1 ISG20 STAT1 CXCL1 TREM1 DEFB1 FADD C7 SOCS1 CFP CCL20	6.08
GO:0018108	peptidyl-tyrosine phosphorylation	biological_process	10/95	323/18668	3.080e-06	3.621e-05	10	IL12RB2 LIF IL22RA2 FLT3 IL23A APP KIT FCER1A SOCS1 IFNG	6.08
GO:0048514	blood vessel morphogenesis	biological_process	15/95	486/18668	2.258e-08	5.107e-07	15	CEACAM1 LIF THBS1 TNFRSF12A CXCL13 PLAU CCR3 CMA1 CXCL10 STAT1 OSM FN1 SPINK5 CD34 TAL1	6.06
GO:0070374	positive regulation of ERK1 and ERK2 cascade	biological_process	5/95	163/18668	4.932e-04	2.207e-03	5	CCL14 CCL21 CCL20 CCL18 CCL25	6.03
GO:0070372	regulation of ERK1 and ERK2 cascade	biological_process	7/95	228/18668	6.584e-05	4.841e-04	7	LIF CCL14 FN1 CCL21 CCL20 CCL18 CCL25	6.03
GO:0007160	cell-matrix adhesion	biological_process	6/95	196/18668	1.826e-04	1.029e-03	6	FN1 THBS1 CCL21 CD34 PLAU CCL25	6.02
GO:0097191	extrinsic apoptotic signaling pathway	biological_process	7/95	232/18668	7.414e-05	5.332e-04	7	LGALS3 THBS1 TNFRSF12A IL19 BID IFNG FADD	5.93
GO:0050852	T cell receptor signaling pathway	biological_process	5/95	166/18668	5.420e-04	2.243e-03	5	GATA3 C6 LGALS3 FOXP3 ADA	5.92
GO:0050691	regulation of defense response to virus by host	biological_process	4/95	133/18668	1.477e-03	4.521e-03	4	LILRB1 IL23A IFIT1 TREM1	5.91
GO:0022617	extracellular matrix disassembly	biological_process	4/95	133/18668	1.477e-03	4.521e-03	4	FN1 CTSG CMA1 CTSL	5.91
GO:0050795	regulation of behavior	biological_process	7/95	233/18668	7.634e-05	5.477e-04	7	THBS1 CCL21 CXCL13 IL23A CXCL10 CXCL1 ADA	5.90
GO:0030099	myeloid cell differentiation	biological_process	10/95	334/18668	4.204e-06	4.791e-05	10	GATA3 LIF IL23A KIT FADD LILRB1 RELB IL34 TAL1 IFNG	5.88
GO:0042113	B cell activation	biological_process	7/95	235/18668	8.092e-05	5.791e-04	7	C7 FOXP3 FLT3 KIT IFNG ADA RAG1	5.85
GO:0006952	defense response	biological_process	54/95	1824/18668	5.216e-24	5.152e-21	54	CCL14 ULBP2 IL22RA2 CXCL10 CD276 FCER1A GZMB TLR8 LGALS3 NLRC5 IFNG CTSG THBS1 FOXP3 CXCL13 IL19 KIT ISG20 CXCL1 TREM1 FADD C7 SOCS1 CTSL TNFRSF11B IL23A APP CCR3 CMA1 ADA CCL18 LILRB1 CXCR6 S100B IL34 GATA3 S100A8 C6 CCL21 TLR2 IRF1 IFIT1 STAT1 DEFB1 CCL25 SLAMF7 RELB FN1 PVR SAA1 CFP CCL20 IL2RB COLEC12	5.82
GO:0010951	negative regulation of endopeptidase activity	biological_process	7/95	239/18668	9.075e-05	6.297e-04	7	SPINK5 SERPINB2 THBS1 APP RAG1 PLAUR FADD	5.76
GO:0006935	chemotaxis	biological_process	25/95	856/18668	4.166e-12	2.743e-10	25	CCL14 IL23A APP CCR3 CXCL10 CCL18 LGALS3 CXCR6 IFNG PLAUR S100A8 GATA3 C6 THBS1 CCL21 CXCL13 PLAU KIT CXCL1 TREM1 DEFB1 CCL25 SAA1 CCL20 IL2RB	5.74
GO:0043281	regulation of cysteine-type endopeptidase activity involved in apoptotic process	biological_process	6/95	207/18668	2.531e-04	1.342e-03	6	S100A8 THBS1 BID RAG1 PLAUR FADD	5.70
GO:0070371	ERK1 and ERK2 cascade	biological_process	7/95	242/18668	9.877e-05	6.743e-04	7	LIF CCL14 FN1 CCL21 CCL20 CCL18 CCL25	5.68
GO:0050778	positive regulation of immune response	biological_process	18/95	627/18668	3.722e-09	1.081e-07	18	IL23A ADA FCER1A TLR8 LGALS3 CTSG GATA3 C6 FOXP3 TLR2 IRF1 FADD RELB C7 PVR CFP CTSL COLEC12	5.64
GO:1902533	positive regulation of intracellular signal transduction	biological_process	23/95	806/18668	4.235e-11	2.201e-09	23	CCL14 TNFRSF11B BID IL23A CXCL10 ADA FCER1A CCL18 S100B IFNG GATA3 S100A8 LIF THBS1 CCL21 IL19 FLT3 KIT FADD CCL25 SAA1 SOCS1 CCL20	5.61
GO:2001242	regulation of intrinsic apoptotic signaling pathway	biological_process	4/95	140/18668	1.844e-03	5.325e-03	4	S100A8 IL19 BID PLAUR	5.61
GO:0000187	activation of MAPK activity	biological_process	4/95	140/18668	1.844e-03	5.325e-03	4	THBS1 SAA1 KIT FCER1A	5.61
GO:0002758	innate immune response-activating signal transduction	biological_process	8/95	282/18668	4.430e-05	3.482e-04	8	C6 TLR2 IRF1 FADD RELB TLR8 CTSL COLEC12	5.57
GO:0051047	positive regulation of secretion	biological_process	9/95	319/18668	1.830e-05	1.609e-04	9	S100A8 GATA3 LIF TLR2 CD276 FCER1A CD34 SAA1 IFNG	5.54
GO:0010631	epithelial cell migration	biological_process	6/95	213/18668	3.000e-04	1.549e-03	6	GATA3 THBS1 CXCL13 KIT IFNG STAT1	5.54
GO:0090132	epithelium migration	biological_process	6/95	214/18668	3.085e-04	1.453e-03	6	GATA3 THBS1 CXCL13 KIT IFNG STAT1	5.51
GO:0010466	negative regulation of peptidase activity	biological_process	7/95	250/18668	1.231e-04	8.197e-04	7	SPINK5 SERPINB2 THBS1 APP RAG1 PLAUR FADD	5.50
GO:0002218	activation of innate immune response	biological_process	8/95	289/18668	5.332e-05	4.072e-04	8	C6 TLR2 IRF1 FADD RELB TLR8 CTSL COLEC12	5.44
GO:0048469	cell maturation	biological_process	4/95	145/18668	2.144e-03	6.126e-03	4	GATA3 CCL21 APP TAL1	5.42
GO:0043410	positive regulation of MAPK cascade	biological_process	12/95	435/18668	1.477e-06	1.919e-05	12	LIF CCL14 TNFRSF11B THBS1 CCL21 FLT3 KIT FCER1A CCL18 CCL25 SAA1 CCL20	5.42
GO:0045089	positive regulation of innate immune response	biological_process	9/95	327/18668	2.252e-05	1.906e-04	9	C6 TLR2 IRF1 FADD RELB TLR8 PVR CTSL COLEC12	5.41
GO:0045785	positive regulation of cell adhesion	biological_process	5/95	182/18668	8.697e-04	3.146e-03	5	THBS1 CCL21 CXCL13 SAA1 CCL25	5.40
GO:2000116	regulation of cysteine-type endopeptidase activity	biological_process	6/95	219/18668	3.538e-04	1.643e-03	6	S100A8 THBS1 BID RAG1 PLAUR FADD	5.38
GO:0002244	hematopoietic progenitor cell differentiation	biological_process	4/95	147/18668	2.274e-03	6.245e-03	4	GATA3 FLT3 TAL1 KIT	5.35
GO:0072089	stem cell proliferation	biological_process	4/95	147/18668	2.274e-03	6.245e-03	4	EPCAM CD34 STAT1 ABCB1	5.35
GO:0001568	blood vessel development	biological_process	15/95	551/18668	1.198e-07	2.275e-06	15	CEACAM1 CCR3 CMA1 CXCL10 OSM CD34 LIF THBS1 TNFRSF12A CXCL13 PLAU STAT1 FN1 SPINK5 TAL1	5.35
GO:0070201	regulation of establishment of protein localization	biological_process	14/95	515/18668	2.948e-07	4.935e-06	14	BID IL23A CD276 LILRB1 GZMB TLR8 CD34 IFNG GATA3 FOXP3 TLR2 FN1 SAA1 SOCS1	5.34
GO:0005615	extracellular space	cellular_component	37/95	1361/18668	5.695e-16	9.375e-14	37	CCL14 ULBP2 IL22RA2 CXCL10 LGALS3 CTSG IFNG LIF THBS1 CXCL13 MSR1 IL19 KIT CXCL1 C7 SERPINB2 CTSL IL15RA TNFRSF11B IL23A APP ADA CCL18 S100B IL34 S100A8 CEACAM6 CCL21 PLAU DEFB1 CCL25 FN1 PVR SAA1 F13A1 CFP CCL20	5.34
GO:0050851	antigen receptor-mediated signaling pathway	biological_process	6/95	222/18668	3.834e-04	1.759e-03	6	GATA3 C6 LGALS3 C7 FOXP3 ADA	5.31
GO:0043542	endothelial cell migration	biological_process	4/95	149/18668	2.410e-03	6.539e-03	4	GATA3 THBS1 CXCL13 STAT1	5.28
GO:0002376	immune system process	biological_process	70/95	2620/18668	6.568e-28	9.730e-25	70	CCL14 CXCL10 CD276 RORC NLRC5 IFNG THBS1 CD1A IL19 ISG20 CXCL1 TREM1 FADD ICAM4 C7 SPINK5 TAL1 SOCS1 POU2AF1 CTSL APP IL21R ICOS CD1C S100B IL34 C6 CCL21 TLR2 IRF1 DEFB1 FN1 PVR CFP CCL20 COLEC12 CEACAM1 ULBP2 TIGIT FCER1A RAG1 GZMB TLR8 LGALS3 CTSG LIF FOXP3 CXCL13 FLT3 KIT ABCB1 TNFRSF11B IL23A CMA1 ADA CCL18 LILRB1 KLRC1 CD34 S100A8 GATA3 CEACAM6 IFIT1 STAT1 CCL25 SLAMF7 RELB SAA1 LAIR2 IL2RB	5.25
GO:0051224	negative regulation of protein transport	biological_process	4/95	150/18668	2.480e-03	6.717e-03	4	LILRB1 FN1 FOXP3 CD34	5.24
GO:0051223	regulation of protein transport	biological_process	12/95	453/18668	2.282e-06	2.853e-05	12	GATA3 FOXP3 TLR2 IL23A CD276 LILRB1 TLR8 FN1 CD34 SAA1 SOCS1 IFNG	5.21
GO:0030198	extracellular matrix organization	biological_process	10/95	377/18668	1.279e-05	1.207e-04	10	TNFRSF11B THBS1 APP CMA1 ICAM4 FN1 LGALS3 SPINK5 CTSG CTSL	5.21
GO:0002757	immune response-activating signal transduction	biological_process	13/95	490/18668	9.443e-07	1.307e-05	13	GATA3 C6 FOXP3 TLR2 IRF1 ADA FADD RELB TLR8 LGALS3 C7 CTSL COLEC12	5.21
GO:0043062	extracellular structure organization	biological_process	10/95	378/18668	1.310e-05	1.217e-04	10	TNFRSF11B THBS1 APP CMA1 ICAM4 FN1 LGALS3 SPINK5 CTSG CTSL	5.20
GO:0033993	response to lipid	biological_process	21/95	797/18668	1.103e-09	4.035e-08	21	IL12RB2 TNFRSF11B BID CXCL10 RORC LILRB1 S100B CTSG IFNG S100A8 GATA3 THBS1 CCL21 CXCL13 TLR2 PLAU STAT1 CXCL1 DEFB1 SOCS1 CCL20	5.18
GO:0043122	regulation of I-kappaB kinase/NF-kappaB signaling	biological_process	6/95	228/18668	4.487e-04	2.017e-03	6	CCL21 S100B TLR2 IL23A STAT1 FADD	5.17
GO:0030097	hemopoiesis	biological_process	19/95	725/18668	6.599e-09	1.746e-07	19	IL23A ADA RAG1 RORC LILRB1 LGALS3 CD34 IL34 IFNG GATA3 LIF FOXP3 IRF1 FLT3 KIT FADD RELB SPINK5 TAL1	5.15
GO:0001944	vasculature development	biological_process	15/95	573/18668	2.001e-07	3.488e-06	15	CEACAM1 CCR3 CMA1 CXCL10 OSM CD34 LIF THBS1 TNFRSF12A CXCL13 PLAU STAT1 FN1 SPINK5 TAL1	5.14
GO:0009612	response to mechanical stimulus	biological_process	5/95	191/18668	1.112e-03	3.677e-03	5	TLR8 IRF1 KIT CXCL10 FADD	5.14
GO:0002520	immune system development	biological_process	21/95	814/18668	1.607e-09	5.473e-08	21	IL23A ICOS ADA RAG1 RORC LILRB1 LGALS3 CD34 IL34 IFNG GATA3 LIF FOXP3 CXCL13 IRF1 FLT3 KIT FADD RELB SPINK5 TAL1	5.07
GO:0002764	immune response-regulating signaling pathway	biological_process	17/95	663/18668	4.953e-08	1.048e-06	17	ADA FCER1A LILRB1 TLR8 LGALS3 GATA3 C6 FOXP3 TLR2 IRF1 KIT FADD RELB C7 IL2RB CTSL COLEC12	5.04
GO:0010632	regulation of epithelial cell migration	biological_process	4/95	156/18668	2.932e-03	7.709e-03	4	GATA3 THBS1 CXCL13 IFNG	5.04
GO:0004252	serine-type endopeptidase activity	molecular_function	4/95	157/18668	3.013e-03	7.866e-03	4	GZMB PLAU CTSG CMA1	5.01
GO:0051222	positive regulation of protein transport	biological_process	7/95	275/18668	2.331e-04	1.272e-03	7	GATA3 TLR2 IL23A CD276 CD34 SAA1 IFNG	5.00
GO:0052547	regulation of peptidase activity	biological_process	10/95	393/18668	1.865e-05	1.630e-04	10	S100A8 THBS1 BID APP RAG1 FADD FN1 SPINK5 SERPINB2 PLAUR	5.00
GO:0045597	positive regulation of cell differentiation	biological_process	17/95	672/18668	6.028e-08	1.215e-06	17	IL23A CD276 ADA RAG1 LGALS3 CD34 IL34 IFNG GATA3 LIF TNFRSF12A FOXP3 MSR1 KIT FADD FN1 TAL1	4.97
GO:0033044	regulation of chromosome organization	biological_process	5/95	198/18668	1.335e-03	4.309e-03	5	GATA3 LIF FOXP3 TAL1 C2	4.96
GO:0008284	positive regulation of cell proliferation	biological_process	20/95	802/18668	6.567e-09	1.753e-07	20	IL12RB2 CCL14 IL23A CCR3 CXCL10 CD276 ADA S100B IL34 IFNG LIF FOXP3 FLT3 PLAU KIT STAT1 FADD EPCAM FN1 PRAME	4.90
GO:0007596	blood coagulation	biological_process	14/95	561/18668	8.410e-07	1.210e-05	14	CEACAM1 APP CD34 PLAUR GATA3 CEACAM6 THBS1 IRF1 PLAU TREM1 FN1 SERPINB2 SAA1 F13A1	4.90
GO:0050817	coagulation	biological_process	14/95	566/18668	9.367e-07	1.309e-05	14	CEACAM1 APP CD34 PLAUR GATA3 CEACAM6 THBS1 IRF1 PLAU TREM1 FN1 SERPINB2 SAA1 F13A1	4.86
GO:0007599	hemostasis	biological_process	14/95	566/18668	9.367e-07	1.309e-05	14	CEACAM1 APP CD34 PLAUR GATA3 CEACAM6 THBS1 IRF1 PLAU TREM1 FN1 SERPINB2 SAA1 F13A1	4.86
GO:0019827	stem cell maintenance	biological_process	4/95	162/18668	3.442e-03	8.732e-03	4	LIF TAL1 KIT NOS2	4.85
GO:0050673	epithelial cell proliferation	biological_process	8/95	325/18668	1.283e-04	8.448e-04	8	GATA3 THBS1 PLAU CCR3 KIT STAT1 CD34 IFNG	4.84
GO:0005102	receptor binding	molecular_function	35/95	1429/18668	6.541e-14	6.057e-12	35	CCL14 ULBP2 CXCL10 TIGIT CD276 IFNG PLAUR LIF THBS1 CXCL13 IL19 CXCL1 FADD ICAM4 C7 SOCS1 PRAME TNFRSF11B IL23A BID APP CCL18 LILRB1 S100B IL34 S100A8 GATA3 CCL21 TLR2 STAT1 CCL25 FN1 PVR SAA1 CCL20	4.81
GO:2000145	regulation of cell motility	biological_process	16/95	661/18668	2.510e-07	4.299e-06	16	IL23A CXCL10 ADA LGALS3 IFNG GATA3 THBS1 CCL21 CXCL13 TLR2 PLAU KIT CXCL1 FADD EPCAM CCL20	4.76
GO:0010810	regulation of cell-substrate adhesion	biological_process	4/95	165/18668	3.720e-03	9.357e-03	4	THBS1 CCL21 PLAU CCL25	4.76
GO:0052548	regulation of endopeptidase activity	biological_process	9/95	372/18668	6.531e-05	4.814e-04	9	S100A8 THBS1 BID APP RAG1 FADD SPINK5 SERPINB2 PLAUR	4.75
GO:0050769	positive regulation of neurogenesis	biological_process	4/95	166/18668	3.817e-03	9.552e-03	4	LIF FN1 TNFRSF12A KIT	4.74
GO:2001233	regulation of apoptotic signaling pathway	biological_process	9/95	373/18668	6.676e-05	4.896e-04	9	S100A8 THBS1 TNFRSF12A IL19 BID FADD GZMB LGALS3 PLAUR	4.74
GO:0032880	regulation of protein localization	biological_process	15/95	624/18668	6.038e-07	9.175e-06	15	BID IL23A CD276 LILRB1 GZMB TLR8 CD34 IFNG GATA3 LIF FOXP3 TLR2 FN1 SAA1 SOCS1	4.72
GO:0030334	regulation of cell migration	biological_process	15/95	624/18668	6.038e-07	9.175e-06	15	IL23A CXCL10 ADA LGALS3 IFNG GATA3 THBS1 CCL21 CXCL13 TLR2 PLAU KIT CXCL1 FADD CCL20	4.72
GO:0016477	cell migration	biological_process	28/95	1171/18668	2.784e-11	1.528e-09	28	CEACAM1 CCL14 CXCL10 LGALS3 IFNG THBS1 CXCL13 KIT CXCL1 TREM1 FADD IL23A ADA CCL18 CD34 S100A8 GATA3 CEACAM6 USP9Y CCL21 TNFRSF12A TLR2 PLAU STAT1 CCL25 FN1 SAA1 CCL20	4.70
GO:0016337	single organismal cell-cell adhesion	biological_process	8/95	335/18668	1.604e-04	9.264e-04	8	S100A8 CXCL13 KIT ICOS ADA ICAM4 EPCAM CD34	4.69
GO:0043406	positive regulation of MAP kinase activity	biological_process	5/95	211/18668	1.837e-03	5.310e-03	5	THBS1 SAA1 FLT3 KIT FCER1A	4.66
GO:0042060	wound healing	biological_process	17/95	721/18668	1.666e-07	2.974e-06	17	CEACAM1 APP CD34 PLAUR S100A8 GATA3 CEACAM6 THBS1 TNFRSF12A IRF1 PLAU TREM1 FN1 SERPINB2 SAA1 F13A1 CCL20	4.63
GO:0002429	immune response-activating cell surface receptor signaling pathway	biological_process	8/95	341/18668	1.828e-04	1.028e-03	8	GATA3 C6 FOXP3 TLR2 ADA RELB LGALS3 C7	4.61
GO:0051046	regulation of secretion	biological_process	15/95	639/18668	8.185e-07	1.183e-05	15	CD276 ADA FCER1A LILRB1 TLR8 CD34 IFNG S100A8 GATA3 LIF FOXP3 TLR2 FN1 SAA1 SOCS1	4.61
GO:0031589	cell-substrate adhesion	biological_process	7/95	302/18668	4.326e-04	1.960e-03	7	THBS1 CCL21 TNFRSF12A PLAU CCL25 FN1 CD34	4.55
GO:0002768	immune response-regulating cell surface receptor signaling pathway	biological_process	12/95	526/18668	1.103e-05	1.054e-04	12	ADA FCER1A LILRB1 LGALS3 GATA3 C6 FOXP3 TLR2 KIT RELB C7 IL2RB	4.48
GO:0048870	cell motility	biological_process	29/95	1275/18668	4.196e-11	2.220e-09	29	CEACAM1 CCL14 CXCL10 LGALS3 IFNG THBS1 CXCL13 KIT CXCL1 TREM1 FADD EPCAM IL23A ADA CCL18 CD34 S100A8 GATA3 CEACAM6 USP9Y CCL21 TNFRSF12A TLR2 PLAU STAT1 CCL25 FN1 SAA1 CCL20	4.47
GO:0070997	neuron death	biological_process	6/95	265/18668	1.076e-03	3.566e-03	6	GATA3 BID APP PLAU FADD CD34	4.45
GO:0031334	positive regulation of protein complex assembly	biological_process	4/95	177/18668	4.999e-03	1.162e-02	4	CCL21 CXCL13 BID TAL1	4.44
GO:0045596	negative regulation of cell differentiation	biological_process	14/95	627/18668	3.200e-06	3.733e-05	14	CXCL10 LILRB1 S100B IFNG GATA3 LIF FOXP3 IRF1 FLT3 KIT NOS2 STAT1 TAL1 PRAME	4.39
GO:0030141	secretory granule	cellular_component	7/95	315/18668	5.694e-04	2.324e-03	7	THBS1 APP KIT FN1 SPINK5 CTSG F13A1	4.37
GO:0030155	regulation of cell adhesion	biological_process	8/95	360/18668	2.716e-04	1.432e-03	8	THBS1 CCL21 CXCL13 PLAU ADA CCL25 EPCAM SAA1	4.37
GO:0040012	regulation of locomotion	biological_process	16/95	721/18668	8.120e-07	1.191e-05	16	IL23A CXCL10 ADA LGALS3 IFNG GATA3 THBS1 CCL21 CXCL13 TLR2 PLAU KIT CXCL1 FADD EPCAM CCL20	4.36
GO:0007204	positive regulation of cytosolic calcium ion concentration	biological_process	5/95	226/18668	2.586e-03	6.966e-03	5	CCL21 CXCL13 SAA1 CCR3 CXCL10	4.35
GO:2001234	negative regulation of apoptotic signaling pathway	biological_process	4/95	181/18668	5.488e-03	1.232e-02	4	LGALS3 THBS1 IL19 PLAUR	4.34
GO:0050678	regulation of epithelial cell proliferation	biological_process	6/95	272/18668	1.249e-03	4.067e-03	6	GATA3 THBS1 PLAU CCR3 STAT1 IFNG	4.33
GO:0009967	positive regulation of signal transduction	biological_process	28/95	1270/18668	1.759e-10	7.897e-09	28	CCL14 CXCL10 FCER1A NLRC5 IFNG PLAUR LIF THBS1 IL19 FLT3 KIT FADD SOCS1 TNFRSF11B IL23A BID ADA CCL18 S100B S100A8 GATA3 C6 CCL21 TNFRSF12A TLR2 CCL25 SAA1 CCL20	4.33
GO:0019216	regulation of lipid metabolic process	biological_process	6/95	273/18668	1.276e-03	4.127e-03	6	CCL21 FLT3 KIT RORC TAP1 IFNG	4.32
GO:0051270	regulation of cellular component movement	biological_process	16/95	731/18668	9.760e-07	1.345e-05	16	IL23A CXCL10 ADA LGALS3 IFNG GATA3 THBS1 CCL21 CXCL13 TLR2 PLAU KIT CXCL1 FADD EPCAM CCL20	4.30
GO:0008236	serine-type peptidase activity	molecular_function	4/95	184/18668	5.877e-03	1.294e-02	4	GZMB PLAU CTSG CMA1	4.27
GO:0006898	receptor-mediated endocytosis	biological_process	6/95	277/18668	1.386e-03	4.449e-03	6	CCL21 MSR1 LILRB1 C7 SAA1 COLEC12	4.26
GO:0017171	serine hydrolase activity	molecular_function	4/95	186/18668	6.147e-03	1.346e-02	4	GZMB PLAU CTSG CMA1	4.23
GO:0043069	negative regulation of programmed cell death	biological_process	15/95	702/18668	2.687e-06	3.223e-05	15	ADA RAG1 RORC LILRB1 PLAUR GATA3 C6 THBS1 CCL21 KIT FADD EPCAM SERPINB2 PRAME IL2RB	4.20
GO:0051701	interaction with host	biological_process	4/95	188/18668	6.426e-03	1.399e-02	4	TLR2 PVR IFIT1 STAT1	4.18
GO:0050688	regulation of defense response to virus	biological_process	4/95	188/18668	6.426e-03	1.399e-02	4	LILRB1 IL23A IFIT1 TREM1	4.18
GO:0043627	response to estrogen	biological_process	4/95	189/18668	6.569e-03	1.422e-02	4	GATA3 TNFRSF11B BID SOCS1	4.16
GO:0050878	regulation of body fluid levels	biological_process	15/95	711/18668	3.150e-06	3.689e-05	15	CEACAM1 APP ADA CD34 PLAUR GATA3 CEACAM6 THBS1 IRF1 PLAU TREM1 FN1 SERPINB2 SAA1 F13A1	4.15
GO:0060548	negative regulation of cell death	biological_process	16/95	760/18668	1.636e-06	2.108e-05	16	ADA RAG1 RORC LILRB1 CD34 PLAUR GATA3 C6 THBS1 CCL21 KIT FADD EPCAM SERPINB2 PRAME IL2RB	4.14
GO:0071396	cellular response to lipid	biological_process	8/95	384/18668	4.327e-04	1.957e-03	8	TLR2 PLAU CXCL10 STAT1 RORC LILRB1 IFNG CCL20	4.09
GO:0031346	positive regulation of cell projection organization	biological_process	5/95	241/18668	3.547e-03	8.975e-03	5	LIF FN1 CCL21 TNFRSF12A KIT	4.08
GO:0002064	epithelial cell development	biological_process	4/95	194/18668	7.318e-03	1.539e-02	4	GATA3 LIF STAT1 OSM	4.05
GO:0040011	locomotion	biological_process	37/95	1800/18668	2.375e-12	1.676e-10	37	CEACAM1 CCL14 CXCL10 LGALS3 IFNG PLAUR THBS1 CXCL13 KIT CXCL1 TREM1 FADD EPCAM IL23A APP CCR3 ADA CCL18 CXCR6 CD34 S100A8 GATA3 C6 CEACAM6 USP9Y CCL21 TNFRSF12A TLR2 PLAU STAT1 DEFB1 CCL25 FN1 PVR SAA1 CCL20 IL2RB	4.04
GO:0043066	negative regulation of apoptotic process	biological_process	14/95	689/18668	9.679e-06	9.560e-05	14	ADA RAG1 RORC LILRB1 PLAUR GATA3 C6 THBS1 CCL21 FADD EPCAM SERPINB2 PRAME IL2RB	3.99
GO:0016485	protein processing	biological_process	15/95	741/18668	5.259e-06	5.750e-05	15	BID APP CMA1 RAG1 GZMB CTSG IFNG PLAUR S100A8 THBS1 FADD FN1 SPINK5 SERPINB2 CFP	3.98
GO:0042127	regulation of cell proliferation	biological_process	30/95	1482/18668	3.252e-10	1.357e-08	30	IL12RB2 CCL14 CXCL10 CD276 LGALS3 IFNG LIF THBS1 FOXP3 CXCL13 FLT3 KIT CXCL1 FADD EPCAM TAL1 PRAME TNFRSF11B BID IL23A CCR3 ADA LILRB1 S100B IL34 GATA3 IRF1 PLAU STAT1 FN1	3.98
GO:0042493	response to drug	biological_process	8/95	397/18668	5.489e-04	2.265e-03	8	GATA3 TNFRSF11B THBS1 TLR2 ADA ABCB1 SOCS1 IFNG	3.96
GO:0051480	cytosolic calcium ion homeostasis	biological_process	5/95	248/18668	4.079e-03	9.956e-03	5	CCL21 CXCL13 SAA1 CCR3 CXCL10	3.96
GO:2000146	negative regulation of cell motility	biological_process	4/95	199/18668	8.126e-03	1.673e-02	4	GATA3 THBS1 CXCL13 ADA	3.95
GO:0051346	negative regulation of hydrolase activity	biological_process	8/95	400/18668	5.790e-04	2.360e-03	8	THBS1 APP IFIT1 RAG1 FADD SPINK5 SERPINB2 PLAUR	3.93
GO:0030168	platelet activation	biological_process	5/95	251/18668	4.325e-03	1.047e-02	5	FN1 THBS1 SAA1 APP F13A1	3.91
GO:0005788	endoplasmic reticulum lumen	cellular_component	4/95	201/18668	8.466e-03	1.720e-02	4	THBS1 FLT3 CFP PLAUR	3.91
GO:0009743	response to carbohydrate	biological_process	4/95	202/18668	8.640e-03	1.750e-02	4	THBS1 PLAU CMA1 COLEC12	3.89
GO:0009605	response to external stimulus	biological_process	49/95	2477/18668	4.162e-15	5.362e-13	49	CCL14 IL22RA2 CXCL10 CD276 NLRC5 IFNG THBS1 ISG20 CXCL1 TREM1 FADD C7 SOCS1 APP C6 FEZ1 CCL21 TLR2 IRF1 PLAU DEFB1 CFP CCL20 IL12RB2 FCER1A TLR8 LGALS3 CTSG PLAUR FOXP3 CXCL13 KIT SERPINB2 TNFRSF11B IL23A CCR3 CMA1 ADA CCL18 LILRB1 CXCR6 CD34 S100A8 GATA3 IFIT1 STAT1 CCL25 SAA1 IL2RB	3.89
GO:0032940	secretion by cell	biological_process	18/95	909/18668	1.026e-06	1.388e-05	18	APP CD276 FCER1A LILRB1 TLR8 CD34 IFNG GATA3 LIF THBS1 FOXP3 TLR2 KIT TREM1 FN1 SAA1 SOCS1 F13A1	3.89
GO:0051604	protein maturation	biological_process	15/95	762/18668	7.413e-06	7.653e-05	15	BID APP CMA1 RAG1 GZMB IFNG CTSG PLAUR S100A8 THBS1 FADD FN1 SPINK5 SERPINB2 CFP	3.87
GO:0048545	response to steroid hormone	biological_process	8/95	408/18668	6.663e-04	2.675e-03	8	GATA3 TNFRSF11B THBS1 BID RORC DEFB1 S100B SOCS1	3.85
GO:0070613	regulation of protein processing	biological_process	12/95	613/18668	5.261e-05	4.059e-04	12	BID APP RAG1 IFNG PLAUR S100A8 THBS1 FADD FN1 SPINK5 SERPINB2 CFP	3.85
GO:0051271	negative regulation of cellular component movement	biological_process	4/95	205/18668	9.177e-03	1.832e-02	4	GATA3 THBS1 CXCL13 ADA	3.83
GO:0001667	ameboidal cell migration	biological_process	6/95	308/18668	2.521e-03	6.822e-03	6	GATA3 THBS1 CXCL13 KIT STAT1 IFNG	3.83
GO:0030162	regulation of proteolysis	biological_process	11/95	566/18668	1.061e-04	7.210e-04	11	BID APP RAG1 IFNG PLAUR S100A8 THBS1 FADD FN1 SPINK5 SERPINB2	3.82
GO:0071310	cellular response to organic substance	biological_process	42/95	2172/18668	6.596e-13	5.143e-11	42	CCL14 IL22RA2 CXCL10 RORC NLRC5 IFNG THBS1 MSR1 ISG20 CXCL1 FADD SOCS1 CTSL IL15RA IL21R C6 CCL21 TLR2 IRF1 PLAU IL11RA CCL20 COLEC12 IL12RB2 SPP1 CXCL13 FLT3 KIT TNFRSF11B CCR3 CMA1 CCL18 LILRB1 CXCR6 GATA3 USP9Y TNFRSF12A IFIT1 STAT1 CCL25 RELB IL2RB	3.80
GO:0046903	secretion	biological_process	20/95	1034/18668	4.210e-07	6.743e-06	20	CD276 FCER1A TLR8 IFNG LIF THBS1 FOXP3 KIT TREM1 SOCS1 APP ADA LILRB1 CD34 GATA3 S100A8 TLR2 FN1 SAA1 F13A1	3.80
GO:0043408	regulation of MAPK cascade	biological_process	15/95	780/18668	9.856e-06	9.702e-05	15	CCL14 TNFRSF11B FCER1A CCL18 C6 LIF THBS1 CCL21 FLT3 KIT CCL25 FN1 SAA1 CCL20 IL2RB	3.78
GO:0042327	positive regulation of phosphorylation	biological_process	19/95	989/18668	8.624e-07	1.223e-05	19	CCL14 TNFRSF11B IL23A FCER1A CCL18 IL34 IFNG PLAUR C6 LIF THBS1 CCL21 FLT3 KIT CCL25 SAA1 SOCS1 CCL20 IL2RB	3.78
GO:0007155	cell adhesion	biological_process	21/95	1094/18668	2.585e-07	4.402e-06	21	CEACAM1 TIGIT THBS1 CXCL13 KIT ICAM4 EPCAM APP CCR3 ICOS ADA CD34 S100A8 CCL21 TNFRSF12A PLAU CCL25 SLAMF7 FN1 PVR SAA1	3.77
GO:0051402	neuron apoptotic process	biological_process	4/95	209/18668	9.930e-03	1.968e-02	4	GATA3 BID APP FADD	3.76
GO:0060560	developmental growth involved in morphogenesis	biological_process	4/95	210/18668	1.012e-02	1.984e-02	4	FN1 THBS1 TNFRSF12A APP	3.74
GO:0014070	response to organic cyclic compound	biological_process	15/95	792/18668	1.186e-05	1.123e-04	15	TNFRSF11B BID CXCL10 ADA RORC S100B GATA3 THBS1 MSR1 PLAU IFIT1 STAT1 DEFB1 SOCS1 COLEC12	3.72
GO:0045595	regulation of cell differentiation	biological_process	28/95	1491/18668	5.993e-09	1.614e-07	28	CXCL10 CD276 RAG1 RORC LGALS3 IFNG LIF FOXP3 MSR1 FLT3 KIT NOS2 FADD SPINK5 TAL1 PRAME IL23A ADA LILRB1 S100B CD34 IL34 GATA3 FEZ1 TNFRSF12A IRF1 STAT1 FN1	3.69
GO:0000165	MAPK cascade	biological_process	16/95	852/18668	7.233e-06	7.627e-05	16	CCL14 TNFRSF11B OSM FCER1A CCL18 C6 LIF THBS1 CCL21 FLT3 KIT CCL25 FN1 SAA1 CCL20 IL2RB	3.69
GO:1902531	regulation of intracellular signal transduction	biological_process	30/95	1606/18668	2.092e-09	7.044e-08	30	CCL14 IL22RA2 CXCL10 FCER1A IFNG PLAUR LIF THBS1 IL19 FLT3 KIT FADD SOCS1 TNFRSF11B IL23A BID ADA CCL18 S100B S100A8 GATA3 C6 CCL21 TLR2 STAT1 CCL25 FN1 SAA1 CCL20 IL2RB	3.67
GO:0098609	cell-cell adhesion	biological_process	4/95	215/18668	1.114e-02	2.146e-02	4	EPCAM CEACAM1 PVR TIGIT	3.66
GO:0048589	developmental growth	biological_process	7/95	378/18668	1.820e-03	5.266e-03	7	GATA3 THBS1 TNFRSF12A APP PLAU FN1 SPINK5	3.64
GO:0051051	negative regulation of transport	biological_process	8/95	433/18668	1.011e-03	3.588e-03	8	LIF THBS1 FOXP3 ADA LILRB1 FN1 LGALS3 CD34	3.63
GO:0001666	response to hypoxia	biological_process	5/95	272/18668	6.367e-03	1.387e-02	5	THBS1 PLAU ADA S100B CD34	3.61
GO:0043065	positive regulation of apoptotic process	biological_process	7/95	382/18668	1.943e-03	5.589e-03	7	THBS1 TNFRSF12A BID FADD LILRB1 S100B IFNG	3.60
GO:0043067	regulation of programmed cell death	biological_process	26/95	1420/18668	3.218e-08	7.011e-07	26	RAG1 RORC GZMB LGALS3 IFNG PLAUR THBS1 IL19 FLT3 KIT FADD EPCAM SERPINB2 PRAME TNFRSF11B BID ADA LILRB1 S100B S100A8 GATA3 C6 CCL21 TNFRSF12A STAT1 IL2RB	3.60
GO:0023014	signal transduction by phosphorylation	biological_process	16/95	882/18668	1.124e-05	1.071e-04	16	CCL14 TNFRSF11B OSM FCER1A CCL18 C6 LIF THBS1 CCL21 FLT3 KIT CCL25 FN1 SAA1 CCL20 IL2RB	3.56
GO:0019932	second-messenger-mediated signaling	biological_process	4/95	221/18668	1.245e-02	2.365e-02	4	THBS1 CXCL10 ADA FCER1A	3.56
GO:0043068	positive regulation of programmed cell death	biological_process	7/95	389/18668	2.175e-03	6.203e-03	7	THBS1 TNFRSF12A BID FADD LILRB1 S100B IFNG	3.54
GO:0010941	regulation of cell death	biological_process	27/95	1497/18668	2.480e-08	5.484e-07	27	RAG1 RORC GZMB LGALS3 IFNG PLAUR THBS1 IL19 FLT3 KIT FADD EPCAM SERPINB2 PRAME TNFRSF11B BID ADA LILRB1 S100B CD34 S100A8 GATA3 C6 CCL21 TNFRSF12A STAT1 IL2RB	3.54
GO:0072001	renal system development	biological_process	5/95	278/18668	7.064e-03	1.489e-02	5	GATA3 LIF STAT1 EPCAM CD34	3.53
GO:0044344	cellular response to fibroblast growth factor stimulus	biological_process	6/95	335/18668	4.011e-03	9.806e-03	6	GATA3 C6 THBS1 CXCL13 KIT IL2RB	3.52
GO:0072358	cardiovascular system development	biological_process	16/95	892/18668	1.296e-05	1.208e-04	16	CEACAM1 CCR3 CMA1 CXCL10 OSM CD34 GATA3 LIF THBS1 TNFRSF12A CXCL13 PLAU STAT1 FN1 SPINK5 TAL1	3.52
GO:0032388	positive regulation of intracellular transport	biological_process	4/95	224/18668	1.314e-02	2.478e-02	4	TLR2 IL23A CXCL10 FCER1A	3.51
GO:0008283	cell proliferation	biological_process	34/95	1918/18668	7.773e-10	2.991e-08	34	IL12RB2 CCL14 CXCL10 CD276 LGALS3 IFNG LIF THBS1 FOXP3 CXCL13 FLT3 KIT ISG20 CXCL1 FADD ABCB1 EPCAM TAL1 PRAME IL15RA TNFRSF11B BID IL23A CCR3 ADA LILRB1 S100B CD34 IL34 GATA3 IRF1 PLAU STAT1 FN1	3.48
GO:0043405	regulation of MAP kinase activity	biological_process	5/95	282/18668	7.560e-03	1.563e-02	5	THBS1 FLT3 KIT FCER1A SAA1	3.48
GO:0042981	regulation of apoptotic process	biological_process	25/95	1410/18668	1.050e-07	2.020e-06	25	RAG1 RORC GZMB LGALS3 IFNG PLAUR THBS1 IL19 FLT3 FADD EPCAM SERPINB2 PRAME TNFRSF11B BID ADA LILRB1 S100B S100A8 GATA3 C6 CCL21 TNFRSF12A STAT1 IL2RB	3.48
GO:0001822	kidney development	biological_process	4/95	226/18668	1.362e-02	2.545e-02	4	GATA3 LIF CD34 STAT1	3.48
GO:0071774	response to fibroblast growth factor	biological_process	6/95	340/18668	4.349e-03	1.052e-02	6	GATA3 C6 THBS1 CXCL13 KIT IL2RB	3.47
GO:0097190	apoptotic signaling pathway	biological_process	11/95	624/18668	2.588e-04	1.367e-03	11	TNFRSF11B BID GZMB LGALS3 IFNG PLAUR S100A8 THBS1 TNFRSF12A IL19 FADD	3.46
GO:0042325	regulation of phosphorylation	biological_process	25/95	1423/18668	1.250e-07	2.359e-06	25	CCL14 IL22RA2 CXCL10 FCER1A TLR8 NLRC5 IFNG PLAUR LIF THBS1 FLT3 KIT SOCS1 TNFRSF11B IL23A APP CCL18 IL34 C6 CCL21 CCL25 FN1 SAA1 CCL20 IL2RB	3.45
GO:0051050	positive regulation of transport	biological_process	13/95	744/18668	9.306e-05	6.442e-04	13	IL23A CXCL10 CD276 FCER1A LGALS3 CD34 IFNG S100A8 GATA3 LIF CCL21 TLR2 SAA1	3.43
GO:0010033	response to organic substance	biological_process	48/95	2746/18668	6.457e-13	5.171e-11	48	CCL14 IL22RA2 CXCL10 RORC NLRC5 IFNG THBS1 MSR1 ISG20 CXCL1 FADD SOCS1 CTSL IL15RA IL21R S100B C6 CCL21 TLR2 IRF1 PLAU DEFB1 IL11RA CCL20 COLEC12 IL12RB2 CTSG SPP1 CXCL13 FLT3 KIT TNFRSF11B BID CCR3 CMA1 ADA CCL18 LILRB1 CXCR6 S100A8 GATA3 USP9Y TNFRSF12A IFIT1 STAT1 CCL25 RELB IL2RB	3.43
GO:0097193	intrinsic apoptotic signaling pathway	biological_process	5/95	288/18668	8.350e-03	1.700e-02	5	S100A8 IL19 BID GZMB PLAUR	3.41
GO:0008285	negative regulation of cell proliferation	biological_process	11/95	633/18668	2.943e-04	1.522e-03	11	CD276 LILRB1 IFNG GATA3 LIF THBS1 FOXP3 IRF1 FLT3 STAT1 CXCL1	3.41
GO:0000790	nuclear chromatin	cellular_component	5/95	288/18668	8.350e-03	1.700e-02	5	GATA3 IRF1 C2 STAT1 TAL1	3.41
GO:0006874	cellular calcium ion homeostasis	biological_process	6/95	347/18668	4.858e-03	1.132e-02	6	CCL14 CCL21 CXCL13 CCR3 CXCL10 SAA1	3.40
GO:0032147	activation of protein kinase activity	biological_process	8/95	463/18668	1.606e-03	4.881e-03	8	C6 THBS1 IL23A KIT FCER1A SAA1 SOCS1 IL2RB	3.40
GO:0071902	positive regulation of protein serine/threonine kinase activity	biological_process	5/95	290/18668	8.627e-03	1.748e-02	5	THBS1 FLT3 KIT FCER1A SAA1	3.39
GO:0006928	cellular component movement	biological_process	33/95	1920/18668	2.851e-09	8.987e-08	33	CEACAM1 CCL14 CXCL10 LGALS3 IFNG PLAUR THBS1 CXCL13 KIT CXCL1 TREM1 FADD EPCAM IL23A APP ADA CCL18 CD34 S100A8 GATA3 C6 CEACAM6 USP9Y CCL21 TNFRSF12A TLR2 PLAU STAT1 CCL25 FN1 SAA1 CCL20 IL2RB	3.38
GO:0042277	peptide binding	molecular_function	4/95	234/18668	1.565e-02	2.848e-02	4	CD1C CD1A TLR2 CMA1	3.36
GO:0010638	positive regulation of organelle organization	biological_process	7/95	409/18668	2.962e-03	7.746e-03	7	LIF CCL21 FOXP3 BID GZMB TAL1 PLAUR	3.36
GO:0006875	cellular metal ion homeostasis	biological_process	8/95	470/18668	1.779e-03	5.357e-03	8	S100A8 CCL14 CCL21 CXCL13 APP CCR3 CXCL10 SAA1	3.34
GO:0006887	exocytosis	biological_process	6/95	356/18668	5.580e-03	1.252e-02	6	THBS1 APP KIT FCER1A FN1 F13A1	3.31
GO:0006950	response to stress	biological_process	66/95	3918/18668	2.717e-16	5.750e-14	66	CCL14 IL22RA2 CXCL10 CD276 OSM NLRC5 IFNG THBS1 IL19 ISG20 CXCL1 TREM1 FADD C7 SOCS1 CTSL APP S100B IL34 C6 FEZ1 CCL21 TLR2 IRF1 PLAU DEFB1 FN1 PVR F13A1 CFP CCL20 COLEC12 CEACAM1 ULBP2 FCER1A GZMB TLR8 LGALS3 CTSG PLAUR SPP1 FOXP3 CXCL13 KIT SERPINB2 TNFRSF11B BID IL23A CCR3 CMA1 ADA CCL18 LILRB1 CXCR6 CD34 S100A8 GATA3 CEACAM6 TNFRSF12A IFIT1 STAT1 CCL25 SLAMF7 RELB SAA1 IL2RB	3.31
GO:0001934	positive regulation of protein phosphorylation	biological_process	14/95	834/18668	8.369e-05	5.975e-04	14	IL23A FCER1A IL34 IFNG PLAUR C6 LIF THBS1 CCL21 FLT3 KIT SAA1 SOCS1 IL2RB	3.30
GO:0051247	positive regulation of protein metabolic process	biological_process	21/95	1259/18668	2.504e-06	3.091e-05	21	CD276 FCER1A TLR8 IFNG PLAUR LIF THBS1 FOXP3 FLT3 KIT FADD SOCS1 IL23A IL34 C6 CCL21 TLR2 IRF1 SAA1 CCL20 IL2RB	3.28
GO:0055074	calcium ion homeostasis	biological_process	6/95	359/18668	5.837e-03	1.305e-02	6	CCL14 CCL21 CXCL13 CCR3 CXCL10 SAA1	3.28
GO:0045860	positive regulation of protein kinase activity	biological_process	10/95	603/18668	7.492e-04	2.956e-03	10	IL23A FCER1A C6 THBS1 CCL21 FLT3 KIT SAA1 SOCS1 IL2RB	3.26
GO:0008219	cell death	biological_process	32/95	1934/18668	1.174e-08	2.923e-07	32	RAG1 RORC GZMB LGALS3 IFNG PLAUR THBS1 IL19 FLT3 KIT FADD EPCAM SERPINB2 PRAME CTSL TNFRSF11B BID APP ADA LILRB1 S100B CD34 GATA3 S100A8 C6 CCL21 TNFRSF12A TLR2 IRF1 PLAU STAT1 IL2RB	3.25
GO:0010942	positive regulation of cell death	biological_process	7/95	423/18668	3.636e-03	9.161e-03	7	THBS1 TNFRSF12A BID FADD LILRB1 S100B IFNG	3.25
GO:0000987	core promoter proximal region sequence-specific DNA binding	molecular_function	6/95	364/18668	6.287e-03	1.372e-02	6	SPP1 GATA3 IRF1 C2 STAT1 PRF1	3.24
GO:0031012	extracellular matrix	cellular_component	7/95	426/18668	3.795e-03	9.505e-03	7	TNFRSF11B THBS1 CMA1 FN1 LGALS3 CTSG CFP	3.23
GO:0010720	positive regulation of cell development	biological_process	4/95	243/18668	1.817e-02	3.233e-02	4	LIF FN1 TNFRSF12A KIT	3.23
GO:0050793	regulation of developmental process	biological_process	34/95	2072/18668	5.338e-09	1.464e-07	34	CXCL10 CD276 RORC IFNG THBS1 MSR1 FADD SPINK5 TAL1 S100B IL34 FEZ1 IRF1 PLAU FN1 RAG1 LGALS3 LIF FOXP3 CXCL13 FLT3 KIT NOS2 PRAME TNFRSF11B IL23A CCR3 CMA1 ADA LILRB1 CD34 GATA3 TNFRSF12A STAT1	3.22
GO:0001159	core promoter proximal region DNA binding	molecular_function	6/95	366/18668	6.474e-03	1.406e-02	6	SPP1 GATA3 IRF1 C2 STAT1 PRF1	3.22
GO:0001932	regulation of protein phosphorylation	biological_process	19/95	1159/18668	8.883e-06	8.892e-05	19	IL22RA2 CXCL10 FCER1A TLR8 IFNG PLAUR LIF THBS1 FLT3 KIT SOCS1 IL23A APP IL34 C6 CCL21 FN1 SAA1 IL2RB	3.22
GO:0033218	amide binding	molecular_function	4/95	245/18668	1.877e-02	3.336e-02	4	CD1C CD1A TLR2 CMA1	3.21
GO:0060341	regulation of cellular localization	biological_process	17/95	1045/18668	2.660e-05	2.226e-04	17	CXCL10 CD276 FCER1A GZMB TLR8 IFNG LIF FOXP3 SOCS1 IL23A BID LILRB1 CD34 GATA3 TLR2 FN1 SAA1	3.20
GO:0012501	programmed cell death	biological_process	30/95	1840/18668	4.373e-08	9.458e-07	30	RAG1 RORC GZMB LGALS3 IFNG PLAUR THBS1 IL19 FLT3 KIT FADD EPCAM SERPINB2 PRAME CTSL TNFRSF11B BID APP ADA LILRB1 S100B GATA3 S100A8 C6 CCL21 TNFRSF12A TLR2 IRF1 STAT1 IL2RB	3.20
GO:0051246	regulation of protein metabolic process	biological_process	36/95	2224/18668	2.853e-09	8.898e-08	36	IL22RA2 CXCL10 CD276 IFNG THBS1 FADD SPINK5 SOCS1 APP IL34 C6 CCL21 TLR2 IRF1 FN1 CFP CCL20 FCER1A RAG1 TLR8 CTSG PLAUR LIF FOXP3 FLT3 KIT NOS2 SERPINB2 IL23A BID CMA1 LILRB1 S100A8 GATA3 SAA1 IL2RB	3.18
GO:0008015	blood circulation	biological_process	7/95	434/18668	4.246e-03	1.035e-02	7	CMA1 CXCL10 STAT1 ADA CD34 CTSG IFNG	3.17
GO:0040013	negative regulation of locomotion	biological_process	4/95	248/18668	1.969e-02	3.446e-02	4	GATA3 THBS1 CXCL13 ADA	3.17
GO:0003013	circulatory system process	biological_process	7/95	437/18668	4.426e-03	1.069e-02	7	CMA1 CXCL10 STAT1 ADA CD34 CTSG IFNG	3.15
GO:0033674	positive regulation of kinase activity	biological_process	10/95	625/18668	1.002e-03	3.560e-03	10	IL23A FCER1A C6 THBS1 CCL21 FLT3 KIT SAA1 SOCS1 IL2RB	3.14
GO:0006915	apoptotic process	biological_process	29/95	1823/18668	1.194e-07	2.282e-06	29	RAG1 RORC GZMB LGALS3 IFNG PLAUR THBS1 IL19 FLT3 FADD EPCAM SERPINB2 PRAME CTSL TNFRSF11B BID APP ADA LILRB1 S100B S100A8 GATA3 C6 CCL21 TNFRSF12A TLR2 IRF1 STAT1 IL2RB	3.13
GO:0008543	fibroblast growth factor receptor signaling pathway	biological_process	5/95	315/18668	1.268e-02	2.404e-02	5	GATA3 C6 THBS1 KIT IL2RB	3.12
GO:0010557	positive regulation of macromolecule biosynthetic process	biological_process	24/95	1514/18668	1.346e-06	1.780e-05	24	CXCL10 CD276 FCER1A RORC TLR8 NLRC5 IFNG SPP1 LIF THBS1 FOXP3 FADD EPCAM TAL1 IL23A LILRB1 GATA3 CCL21 TLR2 IRF1 STAT1 RELB TAP1 CCL20	3.12
GO:0038095	Fc-epsilon receptor signaling pathway	biological_process	5/95	315/18668	1.268e-02	2.404e-02	5	C6 KIT FCER1A C7 IL2RB	3.12
GO:0007050	cell cycle arrest	biological_process	4/95	252/18668	2.096e-02	3.619e-02	4	C6 THBS1 IRF1 IFNG	3.12
GO:0001655	urogenital system development	biological_process	5/95	315/18668	1.268e-02	2.404e-02	5	GATA3 LIF STAT1 EPCAM CD34	3.12
GO:0042592	homeostatic process	biological_process	24/95	1522/18668	1.476e-06	1.927e-05	24	CCL14 CXCL10 RAG1 IFNG FOXP3 CXCL13 FLT3 KIT C2 FADD TAL1 TNFRSF11B APP CCR3 CMA1 ADA CD34 S100A8 GATA3 CCL21 PLAU IFIT1 STAT1 SAA1	3.10
GO:0055082	cellular chemical homeostasis	biological_process	10/95	636/18668	1.153e-03	3.804e-03	10	CCL14 APP CCR3 CMA1 CXCL10 S100A8 CCL21 CXCL13 PLAU SAA1	3.09
GO:0030003	cellular cation homeostasis	biological_process	8/95	508/18668	3.004e-03	7.849e-03	8	S100A8 CCL14 CCL21 CXCL13 APP CCR3 CXCL10 SAA1	3.09
GO:0045786	negative regulation of cell cycle	biological_process	6/95	383/18668	8.241e-03	1.693e-02	6	GATA3 C6 THBS1 IRF1 LILRB1 IFNG	3.08
GO:0030855	epithelial cell differentiation	biological_process	9/95	580/18668	2.058e-03	5.903e-03	9	OSM LGALS3 CD34 IFNG GATA3 LIF KIT STAT1 SPINK5	3.05
GO:0048863	stem cell differentiation	biological_process	6/95	389/18668	8.944e-03	1.806e-02	6	LIF KIT NOS2 STAT1 EPCAM TAL1	3.03
GO:0051347	positive regulation of transferase activity	biological_process	10/95	650/18668	1.371e-03	4.420e-03	10	IL23A FCER1A C6 THBS1 CCL21 FLT3 KIT SAA1 SOCS1 IL2RB	3.02
GO:0006873	cellular ion homeostasis	biological_process	8/95	521/18668	3.553e-03	8.983e-03	8	CCL14 APP CCR3 CXCL10 S100A8 CCL21 CXCL13 SAA1	3.02
GO:0045165	cell fate commitment	biological_process	4/95	262/18668	2.439e-02	4.104e-02	4	GATA3 FOXP3 IL23A TAL1	3.00
GO:0007610	behavior	biological_process	11/95	722/18668	9.356e-04	3.381e-03	11	IL23A APP CXCL10 ADA S100B THBS1 CCL21 CXCL13 KIT CXCL1 TAL1	2.99
GO:0045944	positive regulation of transcription from RNA polymerase II promoter	biological_process	15/95	999/18668	1.782e-04	1.008e-03	15	IL23A CXCL10 LILRB1 NLRC5 IFNG GATA3 LIF FOXP3 TLR2 IRF1 STAT1 FADD EPCAM RELB TAL1	2.95
GO:0055065	metal ion homeostasis	biological_process	8/95	536/18668	4.281e-03	1.038e-02	8	CCL14 APP CCR3 CXCL10 S100A8 CCL21 CXCL13 SAA1	2.93
GO:0043085	positive regulation of catalytic activity	biological_process	22/95	1483/18668	9.958e-06	9.738e-05	22	CCL14 FCER1A IFNG THBS1 FLT3 KIT CXCL1 FADD SOCS1 BID IL23A APP CCL18 S100A8 C6 CCL21 CCL25 TAP1 FN1 SAA1 CCL20 IL2RB	2.92
GO:0004175	endopeptidase activity	molecular_function	6/95	404/18668	1.090e-02	2.128e-02	6	C6 PLAU CMA1 GZMB CTSG CTSL	2.92
GO:0031328	positive regulation of cellular biosynthetic process	biological_process	24/95	1619/18668	4.286e-06	4.847e-05	24	CXCL10 CD276 FCER1A RORC TLR8 NLRC5 IFNG SPP1 LIF THBS1 FOXP3 FADD EPCAM TAL1 IL23A LILRB1 GATA3 CCL21 TLR2 IRF1 STAT1 RELB TAP1 CCL20	2.91
GO:0009966	regulation of signal transduction	biological_process	38/95	2571/18668	1.233e-08	2.995e-07	38	CCL14 IL22RA2 CXCL10 NLRC5 IFNG THBS1 IL19 FADD SOCS1 APP S100B C6 CCL21 TLR2 IRF1 PLAU FN1 CCL20 FCER1A GZMB LGALS3 PLAUR LIF FLT3 KIT PRAME TNFRSF11B BID IL23A ADA CCL18 S100A8 GATA3 TNFRSF12A STAT1 CCL25 SAA1 IL2RB	2.90
GO:0031401	positive regulation of protein modification process	biological_process	15/95	1020/18668	2.248e-04	1.238e-03	15	IL23A FCER1A IL34 IFNG PLAUR C6 LIF THBS1 CCL21 FOXP3 FLT3 KIT SAA1 SOCS1 IL2RB	2.89
GO:0040007	growth	biological_process	14/95	952/18668	3.455e-04	1.607e-03	14	APP OSM CTSG IFNG S100A8 GATA3 THBS1 TNFRSF12A TLR2 PLAU FN1 SPINK5 SOCS1 PRAME	2.89
GO:0004872	receptor activity	molecular_function	23/95	1573/18668	8.219e-06	8.369e-05	23	IL12RB2 IL22RA2 TIGIT FCER1A RORC TLR8 PLAUR MSR1 FLT3 KIT TREM1 IL15RA TNFRSF11B CCR3 IL21R LILRB1 CXCR6 KLRC1 TLR2 PVR IL11RA IL2RB COLEC12	2.87
GO:0030246	carbohydrate binding	molecular_function	4/95	274/18668	2.899e-02	4.709e-02	4	LGALS3 KLRC1 CD34 COLEC12	2.87
GO:0016324	apical plasma membrane	cellular_component	4/95	275/18668	2.939e-02	4.756e-02	4	FEZ1 EPCAM FN1 CD34	2.86
GO:0031226	intrinsic component of plasma membrane	cellular_component	23/95	1578/18668	8.654e-06	8.692e-05	23	CEACAM1 IL12RB2 ULBP2 TIGIT FCER1A PLAUR CD1A MSR1 FLT3 ICAM4 TNFRSF11B APP CCR3 ICOS CD1C CXCR6 KLRC1 CD34 CEACAM6 TLR2 PVR IL11RA IL2RB	2.86
GO:0043549	regulation of kinase activity	biological_process	13/95	892/18668	5.807e-04	2.360e-03	13	IL23A APP CXCL10 FCER1A NLRC5 C6 THBS1 CCL21 FLT3 KIT SAA1 SOCS1 IL2RB	2.86
GO:0005887	integral component of plasma membrane	cellular_component	22/95	1516/18668	1.405e-05	1.289e-04	22	CEACAM1 IL12RB2 TIGIT FCER1A PLAUR CD1A MSR1 FLT3 ICAM4 TNFRSF11B APP CCR3 ICOS CD1C CXCR6 KLRC1 CD34 CEACAM6 TLR2 PVR IL11RA IL2RB	2.85
GO:0006897	endocytosis	biological_process	9/95	626/18668	3.567e-03	9.003e-03	9	APP LILRB1 LGALS3 THBS1 CCL21 MSR1 C7 SAA1 COLEC12	2.83
GO:0048646	anatomical structure formation involved in morphogenesis	biological_process	16/95	1110/18668	1.851e-04	1.039e-03	16	CEACAM1 CXCL10 LIF THBS1 CXCL13 SPINK5 TAL1 CCR3 CMA1 ADA CD34 GATA3 TNFRSF12A PLAU STAT1 FN1	2.83
GO:0010975	regulation of neuron projection development	biological_process	5/95	348/18668	1.994e-02	3.488e-02	5	GATA3 LIF FEZ1 TNFRSF12A FN1	2.82
GO:0031344	regulation of cell projection organization	biological_process	7/95	490/18668	8.695e-03	1.759e-02	7	GATA3 LIF FEZ1 CCL21 TNFRSF12A KIT FN1	2.81
GO:0031325	positive regulation of cellular metabolic process	biological_process	38/95	2654/18668	2.809e-08	6.165e-07	38	CCL14 CXCL10 CD276 RORC NLRC5 IFNG THBS1 FADD EPCAM TAL1 SOCS1 IL34 C6 CCL21 TLR2 IRF1 PLAU CCL20 FCER1A TLR8 PLAUR SPP1 LIF FOXP3 FLT3 KIT NOS2 TNFRSF11B IL23A CCL18 LILRB1 GATA3 STAT1 CCL25 RELB TAP1 SAA1 IL2RB	2.81
GO:0035295	tube development	biological_process	7/95	492/18668	8.903e-03	1.799e-02	7	GATA3 LIF CXCL10 STAT1 OSM ADA EPCAM	2.80
GO:0040008	regulation of growth	biological_process	9/95	633/18668	3.860e-03	9.460e-03	9	APP CTSG IFNG S100A8 TNFRSF12A TLR2 FN1 SOCS1 PRAME	2.79
GO:0009893	positive regulation of metabolic process	biological_process	40/95	2825/18668	1.710e-08	3.897e-07	40	CCL14 CXCL10 CD276 RORC NLRC5 IFNG THBS1 FADD EPCAM TAL1 SOCS1 IL34 C6 CCL21 TLR2 IRF1 PLAU FN1 CCL20 FCER1A TLR8 PLAUR SPP1 LIF FOXP3 FLT3 KIT NOS2 TNFRSF11B IL23A CCL18 LILRB1 CD34 GATA3 STAT1 CCL25 RELB TAP1 SAA1 IL2RB	2.78
GO:0045859	regulation of protein kinase activity	biological_process	12/95	848/18668	1.162e-03	3.800e-03	12	IL23A APP CXCL10 FCER1A C6 THBS1 CCL21 FLT3 KIT SAA1 SOCS1 IL2RB	2.78
GO:0006468	protein phosphorylation	biological_process	22/95	1560/18668	2.188e-05	1.868e-04	22	IL12RB2 IL22RA2 CXCL10 FCER1A TLR8 CTSG IFNG PLAUR LIF THBS1 FLT3 KIT SOCS1 IL23A APP IL34 C6 CCL21 TLR2 FN1 SAA1 IL2RB	2.77
GO:0000977	RNA polymerase II regulatory region sequence-specific DNA binding	molecular_function	8/95	568/18668	6.233e-03	1.361e-02	8	NLRC5 GATA3 IRF1 C2 STAT1 RELB PRF1 TAL1	2.77
GO:0042803	protein homodimerization activity	molecular_function	10/95	709/18668	2.708e-03	7.288e-03	10	CEACAM1 TIGIT RAG1 LILRB1 S100B FOXP3 FLT3 KIT STAT1 PVR	2.77
GO:0000976	transcription regulatory region sequence-specific DNA binding	molecular_function	9/95	642/18668	4.265e-03	1.035e-02	9	NLRC5 SPP1 GATA3 IRF1 C2 STAT1 RELB PRF1 TAL1	2.75
GO:0022604	regulation of cell morphogenesis	biological_process	7/95	500/18668	9.770e-03	1.938e-02	7	LIF FEZ1 TNFRSF12A KIT STAT1 FN1 S100B	2.75
GO:0001012	RNA polymerase II regulatory region DNA binding	molecular_function	8/95	571/18668	6.447e-03	1.402e-02	8	NLRC5 GATA3 IRF1 C2 STAT1 RELB PRF1 TAL1	2.75
GO:0016310	phosphorylation	biological_process	29/95	2074/18668	1.646e-06	2.111e-05	29	CCL14 IL22RA2 CXCL10 OSM NLRC5 IFNG THBS1 SOCS1 APP IL34 C6 CCL21 TLR2 FN1 CCL20 IL12RB2 FCER1A TLR8 CTSG PLAUR LIF FLT3 KIT TNFRSF11B IL23A CCL18 CCL25 SAA1 IL2RB	2.75
GO:0045893	positive regulation of transcription, DNA-templated	biological_process	18/95	1291/18668	1.240e-04	8.238e-04	18	CXCL10 RORC NLRC5 IFNG SPP1 LIF FOXP3 FADD EPCAM TAL1 IL23A LILRB1 GATA3 TLR2 IRF1 STAT1 RELB TAP1	2.74
GO:0009725	response to hormone	biological_process	14/95	1009/18668	6.298e-04	2.542e-03	14	TNFRSF11B BID RORC S100B GATA3 C6 THBS1 CCL21 KIT STAT1 DEFB1 SOCS1 IL2RB CTSL	2.73
GO:0010628	positive regulation of gene expression	biological_process	20/95	1438/18668	5.877e-05	4.386e-04	20	CXCL10 RORC NLRC5 IFNG SPP1 LIF FOXP3 FADD EPCAM TAL1 IL23A LILRB1 CD34 GATA3 TLR2 IRF1 STAT1 RELB TAP1 FN1	2.73
GO:0032270	positive regulation of cellular protein metabolic process	biological_process	16/95	1155/18668	2.930e-04	1.520e-03	16	FCER1A IFNG PLAUR LIF THBS1 FOXP3 FLT3 KIT FADD SOCS1 IL23A IL34 C6 CCL21 SAA1 IL2RB	2.72
GO:0051345	positive regulation of hydrolase activity	biological_process	11/95	799/18668	2.199e-03	6.265e-03	11	CCL14 BID APP CCL18 IFNG S100A8 KIT FADD CCL25 FN1 CCL20	2.71
GO:0007173	epidermal growth factor receptor signaling pathway	biological_process	5/95	363/18668	2.407e-02	4.055e-02	5	C6 APP KIT PLAUR IL2RB	2.71
GO:0051090	regulation of sequence-specific DNA binding transcription factor activity	biological_process	5/95	365/18668	2.466e-02	4.116e-02	5	S100A8 FOXP3 TLR2 KIT NLRC5	2.69
GO:0071407	cellular response to organic cyclic compound	biological_process	5/95	365/18668	2.466e-02	4.116e-02	5	MSR1 PLAU IFIT1 RORC COLEC12	2.69
GO:0019725	cellular homeostasis	biological_process	10/95	733/18668	3.494e-03	8.856e-03	10	CCL14 APP CCR3 CMA1 CXCL10 S100A8 CCL21 CXCL13 PLAU SAA1	2.68
GO:0007166	cell surface receptor signaling pathway	biological_process	50/95	3666/18668	1.188e-09	4.293e-08	50	CCL14 IL22RA2 CXCL10 OSM NLRC5 IFNG THBS1 IL19 ISG20 CXCL1 FADD C7 SOCS1 IL15RA APP IL21R C6 CCL21 TLR2 IRF1 DEFB1 IL11RA CCL20 CEACAM1 IL12RB2 FCER1A GZMB LGALS3 PLAUR LIF FOXP3 CXCL13 FLT3 KIT TNFRSF11B BID CCR3 ADA CCL18 LILRB1 CXCR6 KLRC1 GATA3 USP9Y TNFRSF12A IFIT1 STAT1 CCL25 RELB IL2RB	2.68
GO:0038127	ERBB signaling pathway	biological_process	5/95	370/18668	2.618e-02	4.314e-02	5	C6 APP KIT PLAUR IL2RB	2.66
GO:0035556	intracellular signal transduction	biological_process	36/95	2675/18668	2.772e-07	4.667e-06	36	CCL14 IL22RA2 CXCL10 OSM IFNG THBS1 IL19 CXCL1 TREM1 FADD SOCS1 S100B C6 CCL21 TLR2 FN1 CCL20 FCER1A GZMB TLR8 PLAUR LIF FLT3 KIT TNFRSF11B BID IL23A ADA CCL18 S100A8 GATA3 STAT1 CCL25 RELB SAA1 IL2RB	2.64
GO:0038093	Fc receptor signaling pathway	biological_process	5/95	377/18668	2.843e-02	4.646e-02	5	C6 KIT FCER1A C7 IL2RB	2.61
GO:0038023	signaling receptor activity	molecular_function	18/95	1367/18668	2.549e-04	1.349e-03	18	IL12RB2 IL22RA2 FCER1A RORC PLAUR FLT3 KIT IL15RA TNFRSF11B CCR3 IL21R LILRB1 CXCR6 KLRC1 TLR2 IL11RA IL2RB COLEC12	2.59
GO:0023051	regulation of signaling	biological_process	38/95	2889/18668	2.380e-07	4.100e-06	38	CCL14 IL22RA2 CXCL10 NLRC5 IFNG THBS1 IL19 FADD SOCS1 APP S100B C6 CCL21 TLR2 IRF1 PLAU FN1 CCL20 FCER1A GZMB LGALS3 PLAUR LIF FLT3 KIT PRAME TNFRSF11B IL23A BID ADA CCL18 S100A8 GATA3 TNFRSF12A STAT1 CCL25 SAA1 IL2RB	2.58
GO:0032386	regulation of intracellular transport	biological_process	6/95	462/18668	2.156e-02	3.718e-02	6	TLR2 IL23A BID CXCL10 FCER1A GZMB	2.55
GO:0050790	regulation of catalytic activity	biological_process	29/95	2254/18668	8.227e-06	8.348e-05	29	CCL14 CXCL10 NLRC5 IFNG THBS1 CXCL1 FADD SPINK5 SOCS1 APP C6 CCL21 FN1 CCL20 FCER1A RAG1 PLAUR FLT3 KIT SERPINB2 BID IL23A CCL18 S100A8 IFIT1 CCL25 TAP1 SAA1 IL2RB	2.53
GO:0032268	regulation of cellular protein metabolic process	biological_process	23/95	1787/18668	6.165e-05	4.555e-04	23	IL22RA2 CXCL10 FCER1A TLR8 IFNG PLAUR LIF THBS1 FOXP3 FLT3 KIT NOS2 FADD SOCS1 IL23A APP IL34 GATA3 C6 CCL21 FN1 SAA1 IL2RB	2.53
GO:0048511	rhythmic process	biological_process	4/95	314/18668	4.837e-02	7.260e-02	4	KIT ADA RORC RELB	2.50
GO:0048864	stem cell development	biological_process	4/95	317/18668	5.009e-02	7.477e-02	4	LIF KIT NOS2 TAL1	2.48
GO:0044212	transcription regulatory region DNA binding	molecular_function	10/95	793/18668	6.294e-03	1.372e-02	10	NLRC5 SPP1 GATA3 FOXP3 IRF1 C2 STAT1 RELB PRF1 TAL1	2.48
GO:0042802	identical protein binding	molecular_function	15/95	1195/18668	1.229e-03	4.006e-03	15	CEACAM1 TIGIT RAG1 THBS1 FOXP3 FLT3 KIT C2 FADD APP LILRB1 S100B C6 STAT1 PVR	2.47
GO:0000975	regulatory region DNA binding	molecular_function	10/95	797/18668	6.531e-03	1.415e-02	10	NLRC5 SPP1 GATA3 FOXP3 IRF1 C2 STAT1 RELB PRF1 TAL1	2.47
GO:0005576	extracellular region	cellular_component	56/95	4502/18668	3.458e-09	1.014e-07	56	CCL14 IL22RA2 CXCL10 CD276 IFNG MSR1 IL19 CXCL1 SPINK5 IL15RA APP IL34 DEFB1 PVR CFP CCL20 ULBP2 CTSG LIF CXCL13 KIT TNFRSF11B ADA CD34 IFIT1 SAA1 LAIR2 THBS1 C2 TREM1 ICAM4 EPCAM C7 CTSL ICOS S100B C6 CCL21 PLAU FN1 F13A1 COLEC12 CEACAM1 LGALS3 PLAUR ABCB1 SERPINB2 BID IL23A CMA1 CCL18 LILRB1 S100A8 CEACAM6 CCL25 TAP1	2.44
GO:0034504	protein localization to nucleus	biological_process	4/95	324/18668	5.426e-02	8.047e-02	4	LIF TLR2 IL23A IFNG	2.43
GO:0044708	single-organism behavior	biological_process	5/95	410/18668	4.081e-02	6.324e-02	5	THBS1 APP KIT ADA S100B	2.40
GO:0045664	regulation of neuron differentiation	biological_process	6/95	491/18668	2.908e-02	4.721e-02	6	GATA3 LIF FEZ1 TNFRSF12A FN1 IFNG	2.40
GO:0050801	ion homeostasis	biological_process	8/95	657/18668	1.544e-02	2.812e-02	8	CCL14 APP CCR3 CXCL10 S100A8 CCL21 CXCL13 SAA1	2.39
GO:0046983	protein dimerization activity	molecular_function	14/95	1151/18668	2.319e-03	6.350e-03	14	CEACAM1 TIGIT RAG1 FOXP3 CXCL13 FLT3 KIT TAL1 LILRB1 S100B GATA3 TLR2 STAT1 PVR	2.39
GO:0048878	chemical homeostasis	biological_process	12/95	985/18668	4.287e-03	1.039e-02	12	CCL14 APP CCR3 CMA1 CXCL10 S100A8 CCL21 CXCL13 PLAU IFIT1 STAT1 SAA1	2.39
GO:1902532	negative regulation of intracellular signal transduction	biological_process	5/95	414/18668	4.252e-02	6.545e-02	5	LIF THBS1 STAT1 SOCS1 PLAUR	2.37
GO:0033043	regulation of organelle organization	biological_process	11/95	921/18668	6.869e-03	1.449e-02	11	BID GZMB PLAUR S100A8 GATA3 LIF CCL21 FOXP3 C2 NOS2 TAL1	2.35
GO:0048568	embryonic organ development	biological_process	5/95	420/18668	4.518e-02	6.890e-02	5	GATA3 LIF KIT ADA TAL1	2.34
GO:0016023	cytoplasmic membrane-bounded vesicle	cellular_component	13/95	1094/18668	3.907e-03	9.559e-03	13	CTSG THBS1 MSR1 KIT SPINK5 SOCS1 IL15RA APP ADA FN1 SAA1 F13A1 COLEC12	2.34
GO:0016570	histone modification	biological_process	5/95	419/18668	4.473e-02	6.832e-02	5	SPP1 GATA3 LIF FOXP3 RAG1	2.34
GO:0008286	insulin receptor signaling pathway	biological_process	4/95	336/18668	6.191e-02	8.975e-02	4	C6 KIT SOCS1 IL2RB	2.34
GO:0051174	regulation of phosphorus metabolic process	biological_process	25/95	2108/18668	1.174e-04	7.835e-04	25	CCL14 IL22RA2 CXCL10 NLRC5 IFNG THBS1 SOCS1 APP IL34 C6 CCL21 FN1 CCL20 FCER1A TLR8 PLAUR LIF FLT3 KIT TNFRSF11B IL23A CCL18 CCL25 SAA1 IL2RB	2.33
GO:0004888	transmembrane signaling receptor activity	molecular_function	15/95	1263/18668	2.160e-03	6.166e-03	15	IL12RB2 IL22RA2 FCER1A FLT3 KIT IL15RA TNFRSF11B CCR3 IL21R LILRB1 CXCR6 KLRC1 TLR2 IL11RA IL2RB	2.33
GO:0043254	regulation of protein complex assembly	biological_process	4/95	339/18668	6.392e-02	9.239e-02	4	CCL21 CXCL13 BID TAL1	2.32
GO:0043565	sequence-specific DNA binding	molecular_function	12/95	1018/18668	5.644e-03	1.264e-02	12	RAG1 RORC NLRC5 SPP1 GATA3 FOXP3 IRF1 C2 STAT1 RELB PRF1 TAL1	2.32
GO:0032403	protein complex binding	molecular_function	10/95	851/18668	1.049e-02	2.053e-02	10	FCER1A LGALS3 KLRC1 S100A8 THBS1 C2 FADD ICAM4 EPCAM FN1	2.31
GO:0002009	morphogenesis of an epithelium	biological_process	5/95	427/18668	4.842e-02	7.264e-02	5	GATA3 LIF CXCL10 STAT1 OSM	2.30
GO:0009968	negative regulation of signal transduction	biological_process	12/95	1028/18668	6.118e-03	1.341e-02	12	LGALS3 NLRC5 PLAUR LIF THBS1 IL19 SOCS1 PRAME ADA GATA3 C6 STAT1	2.29
GO:0050767	regulation of neurogenesis	biological_process	7/95	601/18668	2.714e-02	4.460e-02	7	IFNG GATA3 LIF FEZ1 TNFRSF12A KIT FN1	2.29
GO:0071900	regulation of protein serine/threonine kinase activity	biological_process	5/95	429/18668	4.938e-02	7.393e-02	5	THBS1 FLT3 KIT FCER1A SAA1	2.29
GO:0000978	RNA polymerase II core promoter proximal region sequence-specific DNA binding	molecular_function	4/95	343/18668	6.666e-02	9.565e-02	4	IRF1 C2 STAT1 PRF1	2.29
GO:0045177	apical part of cell	cellular_component	4/95	345/18668	6.806e-02	9.752e-02	4	FEZ1 EPCAM FN1 CD34	2.28
GO:0009628	response to abiotic stimulus	biological_process	13/95	1118/18668	4.733e-03	1.109e-02	13	CXCL10 TLR8 THBS1 KIT FADD APP ADA S100B CD34 GATA3 IRF1 PLAU RELB	2.28
GO:0005764	lysosome	cellular_component	6/95	520/18668	3.830e-02	5.989e-02	6	ADA TLR8 CD34 CD1A KIT CTSL	2.27
GO:0007165	signal transduction	biological_process	66/95	5709/18668	2.823e-09	8.994e-08	66	CCL14 IL22RA2 CXCL10 OSM RORC NLRC5 IFNG IL19 CXCL1 IL15RA APP IL21R TLR2 IRF1 DEFB1 IL11RA CCL20 IL12RB2 FCER1A TLR8 SPP1 LIF FOXP3 CXCL13 FLT3 KIT TNFRSF11B ADA CXCR6 CD34 GATA3 TNFRSF12A IFIT1 STAT1 RELB SAA1 IL2RB THBS1 ISG20 TREM1 FADD EPCAM C7 SOCS1 CTSL S100B C6 CCL21 PLAU FN1 COLEC12 CEACAM1 GZMB LGALS3 PLAUR PRAME BID IL23A CCR3 CCL18 LILRB1 KLRC1 S100A8 CEACAM6 USP9Y CCL25	2.27
GO:0051726	regulation of cell cycle	biological_process	11/95	958/18668	9.292e-03	1.854e-02	11	BID APP LILRB1 IFNG GATA3 C6 LIF THBS1 IRF1 NOS2 TAL1	2.26
GO:0004871	signal transducer activity	molecular_function	19/95	1650/18668	9.653e-04	3.446e-03	19	IL12RB2 IL22RA2 FCER1A RORC PLAUR FLT3 KIT IL15RA TNFRSF11B CCR3 IL21R LILRB1 CXCR6 KLRC1 TLR2 STAT1 IL11RA IL2RB COLEC12	2.26
GO:0006508	proteolysis	biological_process	16/95	1392/18668	2.263e-03	6.220e-03	16	RAG1 IFNG CTSG PLAUR THBS1 FADD SPINK5 SERPINB2 CTSL BID APP S100A8 C6 USP9Y PLAU FN1	2.26
GO:0000904	cell morphogenesis involved in differentiation	biological_process	12/95	1050/18668	7.276e-03	1.531e-02	12	LIF KIT TAL1 APP S100B GATA3 C6 FEZ1 TNFRSF12A STAT1 FN1 IL2RB	2.25
GO:0001701	in utero embryonic development	biological_process	4/95	351/18668	7.236e-02	1.028e-01	4	GATA3 LIF OSM ADA	2.24
GO:0016032	viral process	biological_process	9/95	790/18668	1.729e-02	3.116e-02	9	CCR3 CXCR6 C6 IFIT1 ISG20 STAT1 FADD PVR IL2RB	2.24
GO:0000785	chromatin	cellular_component	5/95	439/18668	5.434e-02	8.054e-02	5	GATA3 IRF1 C2 STAT1 TAL1	2.24
GO:0000981	sequence-specific DNA binding RNA polymerase II transcription factor activity	molecular_function	7/95	617/18668	3.121e-02	5.009e-02	7	RORC GATA3 FOXP3 IRF1 STAT1 RELB TAL1	2.23
GO:0008233	peptidase activity	molecular_function	7/95	617/18668	3.121e-02	5.009e-02	7	CMA1 GZMB CTSG C6 USP9Y PLAU CTSL	2.23
GO:0060429	epithelium development	biological_process	10/95	889/18668	1.426e-02	2.633e-02	10	CXCL10 OSM LGALS3 CD34 IFNG GATA3 LIF KIT STAT1 SPINK5	2.21
GO:0043086	negative regulation of catalytic activity	biological_process	9/95	804/18668	1.935e-02	3.397e-02	9	APP RAG1 PLAUR C6 THBS1 IFIT1 FADD SPINK5 SERPINB2	2.20
GO:0071417	cellular response to organonitrogen compound	biological_process	7/95	626/18668	3.368e-02	5.342e-02	7	C6 TLR2 PLAU KIT STAT1 SOCS1 IL2RB	2.20
GO:0023057	negative regulation of signaling	biological_process	12/95	1073/18668	8.670e-03	1.755e-02	12	LGALS3 NLRC5 PLAUR LIF THBS1 IL19 SOCS1 PRAME ADA GATA3 C6 STAT1	2.20
GO:0051128	regulation of cellular component organization	biological_process	22/95	1974/18668	6.601e-04	2.657e-03	22	CXCL10 GZMB LGALS3 PLAUR LIF THBS1 FOXP3 CXCL13 KIT C2 NOS2 TAL1 BID LILRB1 S100B GATA3 S100A8 FEZ1 CCL21 TNFRSF12A STAT1 FN1	2.19
GO:0071363	cellular response to growth factor stimulus	biological_process	9/95	810/18668	2.029e-02	3.536e-02	9	GATA3 C6 USP9Y THBS1 CXCL13 FLT3 PLAU KIT IL2RB	2.18
GO:0048729	tissue morphogenesis	biological_process	6/95	540/18668	4.574e-02	6.972e-02	6	CXCL10 OSM GATA3 LIF STAT1 TAL1	2.18
GO:0060627	regulation of vesicle-mediated transport	biological_process	4/95	362/18668	8.068e-02	1.127e-01	4	CCL21 FCER1A LILRB1 LGALS3	2.17
GO:0018193	peptidyl-amino acid modification	biological_process	12/95	1089/18668	9.760e-03	1.940e-02	12	IL12RB2 IL22RA2 FCER1A IFNG LIF FOXP3 FLT3 KIT SOCS1 IL23A APP S100A8	2.17
GO:0006816	calcium ion transport	biological_process	4/95	364/18668	8.226e-02	1.144e-01	4	CCL21 CXCL10 LILRB1 LGALS3	2.16
GO:0008289	lipid binding	molecular_function	7/95	643/18668	3.873e-02	6.030e-02	7	RORC CD1C S100A8 THBS1 CD1A TLR2 TAP1	2.14
GO:0031410	cytoplasmic vesicle	cellular_component	13/95	1196/18668	8.464e-03	1.721e-02	13	CTSG THBS1 MSR1 KIT SPINK5 SOCS1 IL15RA APP ADA FN1 SAA1 F13A1 COLEC12	2.14
GO:0070848	response to growth factor	biological_process	9/95	832/18668	2.402e-02	4.048e-02	9	GATA3 C6 USP9Y THBS1 CXCL13 FLT3 PLAU KIT IL2RB	2.13
GO:0007169	transmembrane receptor protein tyrosine kinase signaling pathway	biological_process	10/95	931/18668	1.957e-02	3.427e-02	10	APP PLAUR GATA3 C6 THBS1 FLT3 KIT STAT1 SOCS1 IL2RB	2.11
GO:0048667	cell morphogenesis involved in neuron differentiation	biological_process	9/95	841/18668	2.569e-02	4.264e-02	9	APP S100B GATA3 C6 FEZ1 TNFRSF12A KIT FN1 IL2RB	2.10
GO:0015031	protein transport	biological_process	16/95	1494/18668	4.654e-03	1.091e-02	16	CD276 TLR8 IFNG FOXP3 MSR1 TREM1 SOCS1 IL23A BID LILRB1 CD34 GATA3 TLR2 IFIT1 FN1 SAA1	2.10
GO:0010817	regulation of hormone levels	biological_process	5/95	471/18668	7.238e-02	1.028e-01	5	GATA3 LIF CMA1 CTSG IFNG	2.09
GO:0004857	enzyme inhibitor activity	molecular_function	4/95	376/18668	9.208e-02	1.260e-01	4	APP SPINK5 SERPINB2 SOCS1	2.09
GO:0005911	cell-cell junction	cellular_component	4/95	378/18668	9.378e-02	1.281e-01	4	KIT TIGIT EPCAM PVR	2.08
GO:0007409	axonogenesis	biological_process	8/95	760/18668	3.617e-02	5.704e-02	8	APP S100B GATA3 C6 TNFRSF12A KIT FN1 IL2RB	2.07
GO:0023052	signaling	biological_process	66/95	6273/18668	9.230e-08	1.787e-06	66	CCL14 IL22RA2 CXCL10 OSM RORC NLRC5 IFNG IL19 CXCL1 IL15RA APP IL21R TLR2 IRF1 DEFB1 IL11RA CCL20 IL12RB2 FCER1A TLR8 SPP1 LIF FOXP3 CXCL13 FLT3 KIT TNFRSF11B ADA CXCR6 CD34 GATA3 TNFRSF12A IFIT1 STAT1 RELB SAA1 IL2RB THBS1 ISG20 TREM1 FADD EPCAM C7 SOCS1 CTSL S100B C6 CCL21 PLAU FN1 COLEC12 CEACAM1 GZMB LGALS3 PLAUR PRAME BID IL23A CCR3 CCL18 LILRB1 KLRC1 S100A8 CEACAM6 USP9Y CCL25	2.07
GO:0007154	cell communication	biological_process	67/95	6385/18668	8.192e-08	1.597e-06	67	CCL14 IL22RA2 CXCL10 OSM RORC NLRC5 IFNG IL19 CXCL1 IL15RA APP IL21R FEZ1 TLR2 IRF1 DEFB1 IL11RA CCL20 IL12RB2 FCER1A TLR8 SPP1 LIF FOXP3 CXCL13 FLT3 KIT TNFRSF11B ADA CXCR6 CD34 GATA3 TNFRSF12A IFIT1 STAT1 RELB SAA1 IL2RB THBS1 ISG20 TREM1 FADD EPCAM C7 SOCS1 CTSL S100B C6 CCL21 PLAU FN1 COLEC12 CEACAM1 GZMB LGALS3 PLAUR PRAME BID IL23A CCR3 CCL18 LILRB1 KLRC1 S100A8 CEACAM6 USP9Y CCL25	2.06
GO:0045184	establishment of protein localization	biological_process	17/95	1623/18668	4.619e-03	1.085e-02	17	CD276 GZMB TLR8 IFNG FOXP3 MSR1 TREM1 SOCS1 IL23A BID LILRB1 CD34 GATA3 TLR2 IFIT1 FN1 SAA1	2.06
GO:0071375	cellular response to peptide hormone stimulus	biological_process	5/95	476/18668	7.551e-02	1.065e-01	5	C6 KIT STAT1 SOCS1 IL2RB	2.06
GO:0048812	neuron projection morphogenesis	biological_process	9/95	857/18668	2.887e-02	4.692e-02	9	APP S100B GATA3 C6 FEZ1 TNFRSF12A KIT FN1 IL2RB	2.06
GO:0050896	response to stimulus	biological_process	88/95	8386/18668	9.301e-10	3.488e-08	88	CCL14 IL22RA2 CD276 IFNG MSR1 POU2AF1 IL15RA APP IL21R IL34 FEZ1 TLR2 IRF1 DEFB1 PVR IL11RA IL12RB2 FCER1A SPP1 KIT TNFRSF11B CXCR6 GATA3 TNFRSF12A STAT1 SAA1 THBS1 EPCAM CTSL ICOS C6 COLEC12 CEACAM1 RAG1 GZMB LGALS3 PLAUR PRAME CMA1 LILRB1 KLRC1 CEACAM6 USP9Y SLAMF7 CXCL10 OSM RORC NLRC5 IL19 CXCL1 SPINK5 CFP CCL20 ULBP2 TLR8 CTSG LIF FOXP3 CXCL13 FLT3 ADA CD34 IFIT1 RELB LAIR2 IL2RB CD1A ISG20 …	2.06
GO:0009888	tissue development	biological_process	17/95	1645/18668	5.306e-03	1.196e-02	17	CXCL10 CD276 OSM RORC LGALS3 IFNG LIF THBS1 KIT SPINK5 TAL1 S100B CD34 GATA3 PLAU STAT1 FN1	2.03
GO:0000228	nuclear chromosome	cellular_component	5/95	489/18668	8.403e-02	1.166e-01	5	GATA3 IRF1 C2 STAT1 TAL1	2.01
GO:0048513	organ development	biological_process	31/95	3027/18668	3.032e-04	1.562e-03	31	CXCL10 CD276 OSM RORC IFNG THBS1 FADD SPINK5 TAL1 SOCS1 S100B IL34 IRF1 PLAU RAG1 LGALS3 LIF FOXP3 CXCL13 FLT3 KIT TNFRSF11B BID IL23A CMA1 ADA LILRB1 CD34 GATA3 STAT1 RELB	2.01
GO:0032869	cellular response to insulin stimulus	biological_process	4/95	391/18668	1.053e-01	1.411e-01	4	C6 KIT SOCS1 IL2RB	2.01
GO:1901653	cellular response to peptide	biological_process	5/95	491/18668	8.539e-02	1.182e-01	5	C6 KIT STAT1 SOCS1 IL2RB	2.00
GO:0061564	axon development	biological_process	8/95	789/18668	4.456e-02	6.809e-02	8	APP S100B GATA3 C6 TNFRSF12A KIT FN1 IL2RB	1.99
GO:0051248	negative regulation of protein metabolic process	biological_process	7/95	690/18668	5.545e-02	8.211e-02	7	CD276 LILRB1 C6 THBS1 FOXP3 NOS2 SOCS1	1.99
GO:0016568	chromatin modification	biological_process	6/95	598/18668	7.279e-02	1.029e-01	6	RAG1 SPP1 GATA3 LIF FOXP3 C2	1.97
GO:0007267	cell-cell signaling	biological_process	13/95	1299/18668	1.671e-02	3.019e-02	13	CXCL10 IFNG LIF CXCL13 KIT APP CCL18 S100B CD34 GATA3 CEACAM6 CCL21 CCL20	1.97
GO:0032870	cellular response to hormone stimulus	biological_process	7/95	698/18668	5.873e-02	8.610e-02	7	RORC C6 KIT STAT1 SOCS1 IL2RB CTSL	1.97
GO:0051716	cellular response to stimulus	biological_process	69/95	6916/18668	3.335e-07	5.490e-06	69	CCL14 IL22RA2 CXCL10 OSM RORC NLRC5 IFNG MSR1 IL19 CXCL1 IL15RA APP IL21R FEZ1 TLR2 IRF1 DEFB1 IL11RA CCL20 IL12RB2 FCER1A TLR8 SPP1 LIF FOXP3 CXCL13 FLT3 KIT TNFRSF11B ADA CXCR6 CD34 GATA3 TNFRSF12A IFIT1 STAT1 RELB SAA1 IL2RB THBS1 ISG20 TREM1 FADD EPCAM C7 SOCS1 CTSL S100B C6 CCL21 PLAU FN1 COLEC12 CEACAM1 GZMB LGALS3 PLAUR PRAME BID IL23A CCR3 CMA1 CCL18 LILRB1 KLRC1 S100A8 CEACAM6 USP9Y CCL25	1.96
GO:0051649	establishment of localization in cell	biological_process	24/95	2421/18668	2.040e-03	5.857e-03	24	CXCL10 CD276 IFNG THBS1 TREM1 SOCS1 APP CCL21 TLR2 FN1 F13A1 FCER1A GZMB TLR8 LIF FOXP3 KIT BID IL23A LILRB1 CD34 GATA3 IFIT1 SAA1	1.95
GO:0071944	cell periphery	cellular_component	49/95	4954/18668	1.845e-05	1.617e-04	49	IL22RA2 CXCL10 CD276 IFNG MSR1 SPINK5 APP FEZ1 TLR2 PVR IL11RA IL12RB2 ULBP2 FCER1A CTSG FLT3 KIT TNFRSF11B ADA CXCR6 CD34 TNFRSF12A IL2RB THBS1 CD1A TREM1 FADD ICAM4 EPCAM C7 ICOS CD1C PLAU FN1 COLEC12 CEACAM1 TIGIT GZMB LGALS3 PLAUR ABCB1 SERPINB2 PRAME CCR3 LILRB1 KLRC1 S100A8 CEACAM6 SLAMF7	1.94
GO:0005773	vacuole	cellular_component	6/95	609/18668	7.890e-02	1.105e-01	6	ADA TLR8 CD34 CD1A KIT CTSL	1.94
GO:0005886	plasma membrane	cellular_component	48/95	4852/18668	2.214e-05	1.885e-04	48	IL22RA2 CXCL10 CD276 IFNG MSR1 APP FEZ1 TLR2 PVR IL11RA IL12RB2 ULBP2 FCER1A CTSG FLT3 KIT TNFRSF11B ADA CXCR6 CD34 TNFRSF12A IL2RB THBS1 CD1A TREM1 FADD ICAM4 EPCAM C7 ICOS CD1C PLAU FN1 COLEC12 CEACAM1 TIGIT GZMB LGALS3 PLAUR ABCB1 SERPINB2 PRAME CCR3 LILRB1 KLRC1 S100A8 CEACAM6 SLAMF7	1.94
GO:0008134	transcription factor binding	molecular_function	5/95	509/18668	9.829e-02	1.330e-01	5	GATA3 FOXP3 CD34 TAL1 PRAME	1.93
GO:0030425	dendrite	cellular_component	4/95	407/18668	1.205e-01	1.576e-01	4	FEZ1 APP STAT1 ADA	1.93
GO:0016192	vesicle-mediated transport	biological_process	13/95	1333/18668	2.052e-02	3.551e-02	13	FCER1A LGALS3 THBS1 MSR1 KIT C7 APP LILRB1 CCL21 FN1 SAA1 F13A1 COLEC12	1.92
GO:0030154	cell differentiation	biological_process	37/95	3778/18668	2.132e-04	1.183e-03	37	CXCL10 CD276 OSM RORC IFNG MSR1 C2 FADD EPCAM SPINK5 TAL1 SOCS1 APP S100B IL34 C6 FEZ1 CCL21 IRF1 FN1 RAG1 LGALS3 LIF FOXP3 FLT3 KIT NOS2 PRAME IL23A ADA LILRB1 CD34 GATA3 TNFRSF12A STAT1 RELB IL2RB	1.92
GO:0048471	perinuclear region of cytoplasm	cellular_component	6/95	616/18668	8.296e-02	1.152e-01	6	APP S100B CD34 NOS2 STAT1 SPINK5	1.91
GO:0006325	chromatin organization	biological_process	7/95	722/18668	6.934e-02	9.901e-02	7	RAG1 SPP1 GATA3 LIF FOXP3 C2 TAL1	1.91
GO:0007167	enzyme linked receptor protein signaling pathway	biological_process	12/95	1242/18668	2.671e-02	4.399e-02	12	PLAUR LIF THBS1 FLT3 KIT SOCS1 APP GATA3 C6 USP9Y STAT1 IL2RB	1.90
GO:0006357	regulation of transcription from RNA polymerase II promoter	biological_process	17/95	1778/18668	1.152e-02	2.215e-02	17	CXCL10 RORC NLRC5 IFNG LIF FOXP3 FADD EPCAM TAL1 IL23A LILRB1 GATA3 USP9Y TLR2 IRF1 STAT1 RELB	1.88
GO:0007186	G-protein coupled receptor signaling pathway	biological_process	12/95	1258/18668	2.933e-02	4.749e-02	12	CCL14 CXCL10 CXCL13 CXCL1 CCR3 ADA CCL18 CXCR6 CCL21 DEFB1 CCL25 CCL20	1.87
GO:0009890	negative regulation of biosynthetic process	biological_process	13/95	1369/18668	2.526e-02	4.198e-02	13	CD276 IFNG FOXP3 C2 NOS2 TAL1 PRAME LILRB1 CD34 GATA3 IRF1 STAT1 RELB	1.87
GO:0009653	anatomical structure morphogenesis	biological_process	26/95	2727/18668	2.400e-03	6.518e-03	26	CXCL10 OSM IFNG THBS1 SPINK5 TAL1 APP S100B C6 FEZ1 PLAU FN1 CEACAM1 LIF FOXP3 CXCL13 KIT TNFRSF11B CCR3 CMA1 ADA CD34 GATA3 TNFRSF12A STAT1 IL2RB	1.87
GO:0072594	establishment of protein localization to organelle	biological_process	5/95	535/18668	1.189e-01	1.562e-01	5	IL23A BID GZMB IFNG TLR2	1.84
GO:0031175	neuron projection development	biological_process	10/95	1075/18668	4.977e-02	7.433e-02	10	LIF KIT APP S100B GATA3 C6 FEZ1 TNFRSF12A FN1 IL2RB	1.83
GO:0032868	response to insulin	biological_process	4/95	435/18668	1.501e-01	1.893e-01	4	C6 KIT SOCS1 IL2RB	1.81
GO:0044297	cell body	cellular_component	4/95	435/18668	1.501e-01	1.893e-01	4	FEZ1 ADA FADD S100B	1.81
GO:0009143	nucleoside triphosphate catabolic process	biological_process	5/95	546/18668	1.284e-01	1.660e-01	5	CCL14 ADA CCL18 CCL25 CCL20	1.80
GO:0046130	purine ribonucleoside catabolic process	biological_process	5/95	549/18668	1.310e-01	1.687e-01	5	CCL14 ADA CCL18 CCL25 CCL20	1.79
GO:0019058	viral life cycle	biological_process	4/95	439/18668	1.546e-01	1.939e-01	4	IFIT1 ISG20 CXCR6 PVR	1.79
GO:0009887	organ morphogenesis	biological_process	8/95	888/18668	8.360e-02	1.161e-01	8	TNFRSF11B CD34 IFNG GATA3 LIF THBS1 PLAU STAT1	1.77
GO:0007275	multicellular organismal development	biological_process	44/95	4889/18668	3.783e-04	1.738e-03	44	CXCL10 CD276 OSM RORC IFNG CXCL1 SPINK5 APP IL34 FEZ1 IRF1 IL11RA LIF FOXP3 CXCL13 FLT3 KIT TNFRSF11B ADA CD34 GATA3 TNFRSF12A STAT1 RELB IL2RB THBS1 FADD EPCAM TAL1 SOCS1 ICOS S100B C6 PLAU FN1 CEACAM1 RAG1 LGALS3 NOS2 BID IL23A CCR3 CMA1 LILRB1	1.77
GO:0010035	response to inorganic substance	biological_process	4/95	445/18668	1.615e-01	2.008e-01	4	S100A8 TNFRSF11B THBS1 ADA	1.77
GO:0006366	transcription from RNA polymerase II promoter	biological_process	18/95	1997/18668	1.724e-02	3.109e-02	18	CXCL10 RORC NLRC5 IFNG LIF FOXP3 FADD EPCAM TAL1 POU2AF1 IL23A LILRB1 GATA3 USP9Y TLR2 IRF1 STAT1 RELB	1.77
GO:0030182	neuron differentiation	biological_process	13/95	1460/18668	4.102e-02	6.353e-02	13	IFNG LIF KIT SPINK5 TAL1 APP S100B GATA3 C6 FEZ1 TNFRSF12A FN1 IL2RB	1.75
GO:0003682	chromatin binding	molecular_function	4/95	448/18668	1.650e-01	2.047e-01	4	GATA3 C2 RELB TAL1	1.75
GO:0008047	enzyme activator activity	molecular_function	4/95	451/18668	1.686e-01	2.083e-01	4	APP CXCL1 TAP1 FN1	1.74
GO:0031324	negative regulation of cellular metabolic process	biological_process	17/95	1923/18668	2.400e-02	4.057e-02	17	CD276 IFNG LIF FOXP3 C2 NOS2 TAL1 SOCS1 PRAME LILRB1 CD34 GATA3 C6 FEZ1 IRF1 STAT1 RELB	1.74
GO:0006796	phosphate-containing compound metabolic process	biological_process	30/95	3386/18668	3.658e-03	9.209e-03	30	CCL14 IL22RA2 CXCL10 OSM NLRC5 IFNG THBS1 SOCS1 APP IL34 C6 CCL21 TLR2 FN1 CCL20 IL12RB2 FCER1A TLR8 CTSG PLAUR LIF FLT3 KIT TNFRSF11B IL23A ADA CCL18 CCL25 SAA1 IL2RB	1.74
GO:0019222	regulation of metabolic process	biological_process	58/95	6596/18668	9.519e-05	6.559e-04	58	CCL14 IL22RA2 CXCL10 CD276 RORC NLRC5 IFNG CXCL1 PRF1 SPINK5 POU2AF1 APP IL34 FEZ1 TLR2 IRF1 CFP CCL20 FCER1A TLR8 CTSG SPP1 LIF FOXP3 FLT3 KIT TNFRSF11B CD34 GATA3 IFIT1 STAT1 RELB SAA1 IL2RB THBS1 C2 FADD EPCAM TAL1 SOCS1 C6 CCL21 PLAU FN1 RAG1 PLAUR NOS2 SERPINB2 PRAME IL23A BID CMA1 CCL18 LILRB1 S100A8 USP9Y CCL25 TAP1	1.73
GO:0048856	anatomical structure development	biological_process	45/95	5116/18668	5.327e-04	2.208e-03	45	CXCL10 CD276 OSM RORC IFNG CXCL1 SPINK5 APP IL34 FEZ1 IRF1 IL11RA LIF FOXP3 CXCL13 FLT3 KIT TNFRSF11B ADA CD34 GATA3 TNFRSF12A STAT1 RELB IL2RB THBS1 FADD EPCAM TAL1 SOCS1 ICOS S100B C6 CCL21 PLAU FN1 CEACAM1 RAG1 LGALS3 NOS2 BID IL23A CCR3 CMA1 LILRB1	1.73
GO:0010243	response to organonitrogen compound	biological_process	8/95	910/18668	9.467e-02	1.291e-01	8	ADA C6 TLR2 PLAU KIT STAT1 SOCS1 IL2RB	1.73
GO:0043434	response to peptide hormone	biological_process	5/95	570/18668	1.504e-01	1.896e-01	5	C6 KIT STAT1 SOCS1 IL2RB	1.72
GO:0007411	axon guidance	biological_process	5/95	579/18668	1.592e-01	1.985e-01	5	APP GATA3 C6 KIT IL2RB	1.70
GO:0008104	protein localization	biological_process	18/95	2076/18668	2.491e-02	4.147e-02	18	CD276 IFNG MSR1 TREM1 SOCS1 TLR2 FN1 GZMB TLR8 LIF FOXP3 BID IL23A LILRB1 CD34 GATA3 IFIT1 SAA1	1.70
GO:0019538	protein metabolic process	biological_process	46/95	5338/18668	7.184e-04	2.842e-03	46	IL22RA2 CXCL10 CD276 IFNG IL19 SPINK5 APP IL34 TLR2 IRF1 CFP CCL20 IL12RB2 FCER1A TLR8 CTSG SPP1 LIF FOXP3 FLT3 KIT GATA3 SAA1 IL2RB THBS1 TREM1 FADD C7 SOCS1 CTSL C6 CCL21 PLAU FN1 F13A1 RAG1 GZMB PLAUR NOS2 SERPINB2 IL23A BID CMA1 LILRB1 S100A8 USP9Y	1.69
GO:0051641	cellular localization	biological_process	24/95	2797/18668	1.253e-02	2.378e-02	24	CXCL10 CD276 IFNG THBS1 TREM1 SOCS1 APP CCL21 TLR2 FN1 F13A1 FCER1A GZMB TLR8 LIF FOXP3 KIT BID IL23A LILRB1 CD34 GATA3 IFIT1 SAA1	1.69
GO:0005912	adherens junction	cellular_component	4/95	467/18668	1.882e-01	2.290e-01	4	PLAU TIGIT PVR PLAUR	1.68
GO:0016049	cell growth	biological_process	4/95	469/18668	1.907e-01	2.315e-01	4	S100A8 TNFRSF12A APP FN1	1.68
GO:0036211	protein modification process	biological_process	30/95	3499/18668	5.879e-03	1.293e-02	30	IL22RA2 CXCL10 IFNG THBS1 SOCS1 APP IL34 C6 CCL21 TLR2 FN1 F13A1 CFP IL12RB2 FCER1A RAG1 TLR8 CTSG PLAUR SPP1 LIF FOXP3 FLT3 KIT IL23A S100A8 GATA3 USP9Y SAA1 IL2RB	1.68
GO:0030234	enzyme regulator activity	molecular_function	8/95	937/18668	1.095e-01	1.451e-01	8	APP CXCL10 CXCL1 TAP1 FN1 SPINK5 SERPINB2 SOCS1	1.68
GO:0006464	cellular protein modification process	biological_process	30/95	3499/18668	5.879e-03	1.293e-02	30	IL22RA2 CXCL10 IFNG THBS1 SOCS1 APP IL34 C6 CCL21 TLR2 FN1 F13A1 CFP IL12RB2 FCER1A RAG1 TLR8 CTSG PLAUR SPP1 LIF FOXP3 FLT3 KIT IL23A S100A8 GATA3 USP9Y SAA1 IL2RB	1.68
GO:0000989	transcription factor binding transcription factor activity	molecular_function	5/95	588/18668	1.683e-01	2.080e-01	5	GATA3 LIF FOXP3 RELB POU2AF1	1.67
GO:0000988	protein binding transcription factor activity	molecular_function	5/95	592/18668	1.725e-01	2.126e-01	5	GATA3 LIF FOXP3 RELB POU2AF1	1.66
GO:0007346	regulation of mitotic cell cycle	biological_process	4/95	476/18668	1.997e-01	2.401e-01	4	C6 BID APP TAL1	1.65
GO:0031667	response to nutrient levels	biological_process	4/95	476/18668	1.997e-01	2.401e-01	4	TNFRSF11B FEZ1 CXCL10 ADA	1.65
GO:0032502	developmental process	biological_process	48/95	5737/18668	1.049e-03	3.718e-03	48	CXCL10 CD276 OSM RORC IFNG MSR1 CXCL1 SPINK5 APP IL34 FEZ1 IRF1 IL11RA LIF FOXP3 CXCL13 FLT3 KIT TNFRSF11B ADA CD34 GATA3 TNFRSF12A STAT1 RELB IL2RB THBS1 C2 FADD EPCAM TAL1 SOCS1 ICOS S100B C6 CCL21 PLAU FN1 CEACAM1 RAG1 LGALS3 NOS2 PRAME IL23A BID CCR3 CMA1 LILRB1	1.64
GO:0007283	spermatogenesis	biological_process	4/95	480/18668	2.049e-01	2.456e-01	4	USP9Y PLAU KIT NOS2	1.64
GO:0043547	positive regulation of GTPase activity	biological_process	4/95	480/18668	2.049e-01	2.456e-01	4	CCL14 CCL18 CCL25 CCL20	1.64
GO:0000122	negative regulation of transcription from RNA polymerase II promoter	biological_process	6/95	717/18668	1.566e-01	1.956e-01	6	IFNG GATA3 FOXP3 STAT1 RELB TAL1	1.64
GO:0009314	response to radiation	biological_process	4/95	478/18668	2.023e-01	2.431e-01	4	GATA3 APP KIT CXCL10	1.64
GO:0048232	male gamete generation	biological_process	4/95	481/18668	2.062e-01	2.467e-01	4	USP9Y PLAU KIT NOS2	1.63
GO:0048699	generation of neurons	biological_process	13/95	1571/18668	6.910e-02	9.872e-02	13	IFNG LIF KIT SPINK5 TAL1 APP S100B GATA3 C6 FEZ1 TNFRSF12A FN1 IL2RB	1.63
GO:0048666	neuron development	biological_process	10/95	1208/18668	9.938e-02	1.342e-01	10	LIF KIT APP S100B GATA3 C6 FEZ1 TNFRSF12A FN1 IL2RB	1.63
GO:1901652	response to peptide	biological_process	5/95	603/18668	1.841e-01	2.247e-01	5	C6 KIT STAT1 SOCS1 IL2RB	1.63
GO:0010468	regulation of gene expression	biological_process	38/95	4620/18668	4.369e-03	1.056e-02	38	CXCL10 RORC NLRC5 IFNG PRF1 SPINK5 POU2AF1 APP FEZ1 TLR2 IRF1 CFP SPP1 LIF FOXP3 KIT CD34 GATA3 STAT1 RELB THBS1 C2 FADD EPCAM TAL1 C6 FN1 RAG1 PLAUR NOS2 SERPINB2 PRAME IL23A BID LILRB1 S100A8 USP9Y TAP1	1.62
GO:0033365	protein localization to organelle	biological_process	6/95	727/18668	1.655e-01	2.052e-01	6	IL23A BID GZMB IFNG LIF TLR2	1.62
GO:0000902	cell morphogenesis	biological_process	12/95	1455/18668	7.970e-02	1.114e-01	12	LIF KIT TAL1 APP S100B GATA3 C6 FEZ1 TNFRSF12A STAT1 FN1 IL2RB	1.62
GO:0048858	cell projection morphogenesis	biological_process	9/95	1098/18668	1.184e-01	1.556e-01	9	KIT APP S100B GATA3 C6 FEZ1 TNFRSF12A FN1 IL2RB	1.61
GO:0010608	posttranscriptional regulation of gene expression	biological_process	5/95	615/18668	1.973e-01	2.380e-01	5	APP C6 THBS1 C2 NOS2	1.60
GO:0019904	protein domain specific binding	molecular_function	5/95	615/18668	1.973e-01	2.380e-01	5	APP LILRB1 PLAUR GATA3 FADD	1.60
GO:0044702	single organism reproductive process	biological_process	8/95	997/18668	1.477e-01	1.868e-01	8	ADA GATA3 LIF USP9Y PLAU KIT NOS2 IL11RA	1.58
GO:0050794	regulation of cellular process	biological_process	81/95	10071/18668	9.748e-05	6.671e-04	81	CCL14 IL22RA2 CD276 IFNG MSR1 POU2AF1 IL15RA APP IL21R IL34 FEZ1 TLR2 IRF1 DEFB1 IL11RA IL12RB2 FCER1A SPP1 KIT TNFRSF11B CXCR6 GATA3 TNFRSF12A STAT1 SAA1 THBS1 EPCAM CTSL ICOS C6 COLEC12 CEACAM1 TIGIT RAG1 GZMB LGALS3 PLAUR PRAME LILRB1 KLRC1 CEACAM6 USP9Y TAP1 CXCL10 OSM RORC NLRC5 IL19 CXCL1 PRF1 SPINK5 CCL20 TLR8 LIF FOXP3 CXCL13 FLT3 ADA CD34 IFIT1 RELB IL2RB C2 ISG20 TREM1 FADD C7 TAL1 SOCS…	1.58
GO:0032990	cell part morphogenesis	biological_process	9/95	1118/18668	1.300e-01	1.678e-01	9	KIT APP S100B GATA3 C6 FEZ1 TNFRSF12A FN1 IL2RB	1.58
GO:0048468	cell development	biological_process	18/95	2236/18668	4.856e-02	7.282e-02	18	CXCL10 OSM IFNG TAL1 APP S100B C6 FEZ1 CCL21 FN1 LIF KIT NOS2 LILRB1 GATA3 TNFRSF12A STAT1 IL2RB	1.58
GO:0019953	sexual reproduction	biological_process	6/95	750/18668	1.869e-01	2.276e-01	6	APP ADA USP9Y PLAU KIT NOS2	1.57
GO:0022414	reproductive process	biological_process	9/95	1130/18668	1.372e-01	1.758e-01	9	LIF KIT NOS2 APP ADA GATA3 USP9Y PLAU IL11RA	1.57
GO:0031988	membrane-bounded vesicle	cellular_component	28/95	3524/18668	2.010e-02	3.505e-02	28	CD276 THBS1 MSR1 C2 EPCAM SPINK5 SOCS1 CTSL IL15RA APP C6 PLAU DEFB1 FN1 PVR F13A1 COLEC12 CEACAM1 LGALS3 CTSG PLAUR KIT ABCB1 BID ADA S100A8 TAP1 SAA1	1.56
GO:0009991	response to extracellular stimulus	biological_process	4/95	504/18668	2.377e-01	2.797e-01	4	TNFRSF11B FEZ1 CXCL10 ADA	1.56
GO:0070062	extracellular vesicular exosome	cellular_component	22/95	2767/18668	3.608e-02	5.692e-02	22	CD276 THBS1 C2 EPCAM SPINK5 CTSL APP C6 PLAU DEFB1 FN1 PVR COLEC12 CEACAM1 LGALS3 CTSG PLAUR ABCB1 BID S100A8 TAP1 SAA1	1.56
GO:0022008	neurogenesis	biological_process	13/95	1650/18668	9.614e-02	1.309e-01	13	IFNG LIF KIT SPINK5 TAL1 APP S100B GATA3 C6 FEZ1 TNFRSF12A FN1 IL2RB	1.55
GO:0006195	purine nucleotide catabolic process	biological_process	5/95	634/18668	2.191e-01	2.601e-01	5	CCL14 ADA CCL18 CCL25 CCL20	1.55
GO:0033554	cellular response to stress	biological_process	14/95	1781/18668	8.829e-02	1.216e-01	14	CXCL10 OSM FCER1A IFNG SPP1 THBS1 BID S100B CD34 C6 FEZ1 CCL21 PLAU RELB	1.54
GO:0048609	multicellular organismal reproductive process	biological_process	6/95	772/18668	2.088e-01	2.492e-01	6	ADA LIF USP9Y PLAU KIT NOS2	1.53
GO:0031982	vesicle	cellular_component	28/95	3640/18668	2.964e-02	4.791e-02	28	CD276 THBS1 MSR1 C2 EPCAM SPINK5 SOCS1 CTSL IL15RA APP C6 PLAU DEFB1 FN1 PVR F13A1 COLEC12 CEACAM1 LGALS3 CTSG PLAUR KIT ABCB1 BID ADA S100A8 TAP1 SAA1	1.51
GO:0010467	gene expression	biological_process	43/95	5625/18668	9.299e-03	1.854e-02	43	CXCL10 RORC NLRC5 IFNG PRF1 SPINK5 POU2AF1 APP FEZ1 TLR2 IRF1 CFP CTSG SPP1 LIF FOXP3 KIT CD34 GATA3 STAT1 RELB THBS1 C2 ISG20 FADD EPCAM TAL1 C6 FN1 RAG1 GZMB LGALS3 PLAUR NOS2 SERPINB2 PRAME IL23A BID CMA1 LILRB1 S100A8 USP9Y TAP1	1.50
GO:0007049	cell cycle	biological_process	13/95	1708/18668	1.202e-01	1.573e-01	13	IFNG LIF THBS1 NOS2 ABCB1 TAL1 BID APP LILRB1 GATA3 C6 FEZ1 IRF1	1.50
GO:0009166	nucleotide catabolic process	biological_process	5/95	655/18668	2.446e-01	2.866e-01	5	CCL14 ADA CCL18 CCL25 CCL20	1.50
GO:0005515	protein binding	molecular_function	80/95	10566/18668	6.654e-04	2.675e-03	80	CCL14 IL22RA2 CD276 IFNG MSR1 POU2AF1 IL15RA APP IL34 FEZ1 TLR2 IRF1 PVR IL12RB2 FCER1A SPP1 KIT TNFRSF11B CXCR6 GATA3 TNFRSF12A STAT1 SAA1 THBS1 EPCAM CTSL C6 CEACAM1 TIGIT RAG1 GZMB LGALS3 PLAUR PRAME LILRB1 KLRC1 CEACAM6 USP9Y MAGEC1 CXCL10 OSM RORC NLRC5 IL19 CXCL1 CCL20 ULBP2 CTSG LIF FOXP3 CXCL13 FLT3 ADA CD34 IFIT1 RELB LAIR2 IL2RB MAGEB2 CD1A C2 TREM1 FADD ICAM4 C7 TAL1 SOCS1 CD1C S100B C…	1.49
GO:0044267	cellular protein metabolic process	biological_process	34/95	4492/18668	2.217e-02	3.782e-02	34	IL22RA2 CXCL10 IFNG APP IL34 TLR2 CFP IL12RB2 FCER1A TLR8 CTSG SPP1 LIF FOXP3 FLT3 KIT GATA3 SAA1 IL2RB THBS1 FADD SOCS1 CTSL C6 CCL21 FN1 F13A1 RAG1 PLAUR NOS2 IL23A CMA1 S100A8 USP9Y	1.49
GO:0032504	multicellular organism reproduction	biological_process	6/95	794/18668	2.320e-01	2.733e-01	6	ADA LIF USP9Y PLAU KIT NOS2	1.48
GO:0051171	regulation of nitrogen compound metabolic process	biological_process	34/95	4508/18668	2.325e-02	3.941e-02	34	CCL14 CXCL10 RORC NLRC5 IFNG PRF1 POU2AF1 FEZ1 TLR2 IRF1 CCL20 SPP1 LIF FOXP3 KIT CD34 GATA3 STAT1 RELB THBS1 C2 FADD EPCAM TAL1 C6 NOS2 PRAME IL23A CCL18 LILRB1 S100A8 USP9Y CCL25 TAP1	1.48
GO:0030030	cell projection organization	biological_process	11/95	1471/18668	1.585e-01	1.978e-01	11	LIF KIT APP S100B GATA3 C6 FEZ1 CCL21 TNFRSF12A FN1 IL2RB	1.47
GO:0043087	regulation of GTPase activity	biological_process	4/95	535/18668	2.834e-01	3.262e-01	4	CCL14 CCL18 CCL25 CCL20	1.47
GO:0019899	enzyme binding	molecular_function	12/95	1619/18668	1.536e-01	1.928e-01	12	IL12RB2 PLAUR FOXP3 KIT FADD TAL1 SOCS1 BID APP LILRB1 STAT1 FN1	1.46
GO:0006163	purine nucleotide metabolic process	biological_process	7/95	939/18668	2.246e-01	2.661e-01	7	CCL14 CXCL10 ADA CCL18 THBS1 CCL25 CCL20	1.46
GO:0010564	regulation of cell cycle process	biological_process	4/95	543/18668	2.958e-01	3.387e-01	4	BID C6 LIF NOS2	1.45
GO:0006810	transport	biological_process	32/95	4328/18668	3.491e-02	5.529e-02	32	CXCL10 CD276 IFNG MSR1 APP TLR2 FCER1A TLR8 LIF FOXP3 KIT ADA CD34 GATA3 IFIT1 SAA1 THBS1 TREM1 C7 SOCS1 CCL21 FN1 F13A1 COLEC12 GZMB LGALS3 ABCB1 BID IL23A LILRB1 S100A8 TAP1	1.45
GO:0003712	transcription cofactor activity	molecular_function	4/95	545/18668	2.990e-01	3.414e-01	4	GATA3 FOXP3 RELB POU2AF1	1.44
GO:0045892	negative regulation of transcription, DNA-templated	biological_process	8/95	1095/18668	2.257e-01	2.670e-01	8	IFNG FOXP3 TAL1 PRAME GATA3 IRF1 STAT1 RELB	1.44
GO:0043269	regulation of ion transport	biological_process	4/95	549/18668	3.053e-01	3.477e-01	4	CXCL10 LILRB1 LGALS3 THBS1	1.43
GO:0000003	reproduction	biological_process	9/95	1237/18668	2.133e-01	2.540e-01	9	LIF KIT NOS2 APP ADA GATA3 USP9Y PLAU IL11RA	1.43
GO:0046039	GTP metabolic process	biological_process	4/95	550/18668	3.068e-01	3.490e-01	4	CCL14 CCL18 CCL25 CCL20	1.43
GO:0009790	embryo development	biological_process	7/95	976/18668	2.620e-01	3.043e-01	7	OSM ADA GATA3 LIF KIT FN1 TAL1	1.41
GO:1902679	negative regulation of RNA biosynthetic process	biological_process	8/95	1118/18668	2.468e-01	2.887e-01	8	IFNG FOXP3 TAL1 PRAME GATA3 IRF1 STAT1 RELB	1.41
GO:0051252	regulation of RNA metabolic process	biological_process	26/95	3618/18668	7.218e-02	1.026e-01	26	CXCL10 RORC NLRC5 IFNG FADD EPCAM PRF1 TAL1 POU2AF1 FEZ1 TLR2 IRF1 SPP1 LIF FOXP3 KIT NOS2 PRAME IL23A LILRB1 S100A8 GATA3 USP9Y STAT1 RELB TAP1	1.41
GO:2001141	regulation of RNA biosynthetic process	biological_process	25/95	3519/18668	8.599e-02	1.189e-01	25	CXCL10 RORC NLRC5 IFNG FADD EPCAM PRF1 TAL1 POU2AF1 FEZ1 TLR2 IRF1 SPP1 LIF FOXP3 KIT PRAME IL23A LILRB1 S100A8 GATA3 USP9Y STAT1 RELB TAP1	1.40
GO:0006355	regulation of transcription, DNA-templated	biological_process	25/95	3499/18668	8.141e-02	1.136e-01	25	CXCL10 RORC NLRC5 IFNG FADD EPCAM PRF1 TAL1 POU2AF1 FEZ1 TLR2 IRF1 SPP1 LIF FOXP3 KIT PRAME IL23A LILRB1 S100A8 GATA3 USP9Y STAT1 RELB TAP1	1.40
GO:0051276	chromosome organization	biological_process	7/95	987/18668	2.737e-01	3.164e-01	7	RAG1 SPP1 GATA3 LIF FOXP3 C2 TAL1	1.39
GO:0009154	purine ribonucleotide catabolic process	biological_process	4/95	564/18668	3.294e-01	3.724e-01	4	CCL14 CCL18 CCL25 CCL20	1.39
GO:0046434	organophosphate catabolic process	biological_process	5/95	712/18668	3.206e-01	3.638e-01	5	CCL14 ADA CCL18 CCL25 CCL20	1.38
GO:0030054	cell junction	cellular_component	8/95	1144/18668	2.719e-01	3.148e-01	8	TIGIT PLAUR KIT EPCAM ADA FEZ1 PLAU PVR	1.37
GO:0007399	nervous system development	biological_process	16/95	2314/18668	1.807e-01	2.212e-01	16	IFNG CXCL1 SPINK5 TAL1 APP S100B C6 FEZ1 FN1 LIF KIT BID CMA1 GATA3 TNFRSF12A IL2RB	1.36
GO:0019439	aromatic compound catabolic process	biological_process	7/95	1011/18668	3.000e-01	3.423e-01	7	CCL14 ADA CCL18 ISG20 NOS2 CCL25 CCL20	1.36
GO:0042278	purine nucleoside metabolic process	biological_process	5/95	720/18668	3.320e-01	3.747e-01	5	CCL14 ADA CCL18 CCL25 CCL20	1.36
GO:0016021	integral component of membrane	cellular_component	37/95	5404/18668	6.722e-02	9.636e-02	37	IL22RA2 CD276 MSR1 IL15RA APP IL21R TLR2 PVR IL11RA IL12RB2 FCER1A TLR8 FLT3 KIT TNFRSF11B CXCR6 CD34 TNFRSF12A IL2RB CD1A TREM1 ICAM4 EPCAM ICOS CD1C COLEC12 CEACAM1 TIGIT PLAUR ABCB1 BID CCR3 LILRB1 KLRC1 CEACAM6 SLAMF7 TAP1	1.35
GO:0010629	negative regulation of gene expression	biological_process	9/95	1314/18668	2.805e-01	3.235e-01	9	IFNG FOXP3 TAL1 PRAME CD34 GATA3 IRF1 STAT1 RELB	1.35
GO:0031224	intrinsic component of membrane	cellular_component	38/95	5526/18668	6.065e-02	8.822e-02	38	IL22RA2 CD276 MSR1 IL15RA APP IL21R TLR2 PVR IL11RA IL12RB2 ULBP2 FCER1A TLR8 FLT3 KIT TNFRSF11B CXCR6 CD34 TNFRSF12A IL2RB CD1A TREM1 ICAM4 EPCAM ICOS CD1C COLEC12 CEACAM1 TIGIT PLAUR ABCB1 BID CCR3 LILRB1 KLRC1 CEACAM6 SLAMF7 TAP1	1.35
GO:0008270	zinc ion binding	molecular_function	8/95	1175/18668	3.034e-01	3.456e-01	8	RAG1 RORC SPP1 NOS2 ADA S100B S100A8 GATA3	1.34
GO:0001071	nucleic acid binding transcription factor activity	molecular_function	8/95	1177/18668	3.055e-01	3.478e-01	8	RORC FOXP3 TAL1 GATA3 FEZ1 IRF1 STAT1 RELB	1.34
GO:0003700	sequence-specific DNA binding transcription factor activity	molecular_function	8/95	1177/18668	3.055e-01	3.478e-01	8	RORC FOXP3 TAL1 GATA3 FEZ1 IRF1 STAT1 RELB	1.34
GO:0006605	protein targeting	biological_process	4/95	587/18668	3.677e-01	4.105e-01	4	BID IL23A IFNG TLR2	1.34
GO:0009259	ribonucleotide metabolic process	biological_process	6/95	881/18668	3.359e-01	3.783e-01	6	CCL14 CXCL10 CCL18 THBS1 CCL25 CCL20	1.34
GO:0006351	transcription, DNA-templated	biological_process	25/95	3674/18668	1.281e-01	1.657e-01	25	CXCL10 RORC NLRC5 IFNG FADD EPCAM PRF1 TAL1 POU2AF1 FEZ1 TLR2 IRF1 SPP1 LIF FOXP3 KIT PRAME IL23A LILRB1 GATA3 S100A8 USP9Y STAT1 RELB TAP1	1.34
GO:0043009	chordate embryonic development	biological_process	4/95	602/18668	3.936e-01	4.366e-01	4	OSM ADA GATA3 LIF	1.31
GO:0032269	negative regulation of cellular protein metabolic process	biological_process	4/95	602/18668	3.936e-01	4.366e-01	4	C6 FOXP3 NOS2 SOCS1	1.31
GO:0016070	RNA metabolic process	biological_process	30/95	4492/18668	1.217e-01	1.591e-01	30	CXCL10 RORC NLRC5 IFNG PRF1 POU2AF1 APP FEZ1 TLR2 IRF1 SPP1 LIF FOXP3 KIT GATA3 STAT1 RELB C2 ISG20 FADD EPCAM TAL1 LGALS3 NOS2 PRAME IL23A LILRB1 S100A8 USP9Y TAP1	1.31
GO:0007276	gamete generation	biological_process	4/95	602/18668	3.936e-01	4.366e-01	4	USP9Y PLAU KIT NOS2	1.31
GO:0046907	intracellular transport	biological_process	11/95	1659/18668	2.949e-01	3.379e-01	11	CXCL10 FCER1A GZMB IFNG KIT BID IL23A APP CCL21 TLR2 IFIT1	1.30
GO:0005768	endosome	cellular_component	5/95	764/18668	3.976e-01	4.401e-01	5	APP TLR8 CD1C CD1A CTSL	1.29
GO:0009792	embryo development ending in birth or egg hatching	biological_process	4/95	608/18668	4.041e-01	4.466e-01	4	OSM ADA GATA3 LIF	1.29
GO:0032774	RNA biosynthetic process	biological_process	25/95	3794/18668	1.694e-01	2.092e-01	25	CXCL10 RORC NLRC5 IFNG FADD EPCAM PRF1 TAL1 POU2AF1 FEZ1 TLR2 IRF1 SPP1 LIF FOXP3 KIT PRAME IL23A LILRB1 S100A8 GATA3 USP9Y STAT1 RELB TAP1	1.29
GO:0005829	cytosol	cellular_component	21/95	3209/18668	2.097e-01	2.501e-01	21	IL22RA2 NLRC5 MSR1 C2 FADD SPINK5 SOCS1 APP C6 IRF1 GZMB CXCL13 BID CCR3 ADA S100A8 IFIT1 STAT1 RELB TAP1 SAA1	1.29
GO:0034645	cellular macromolecule biosynthetic process	biological_process	32/95	4927/18668	1.485e-01	1.875e-01	32	CXCL10 RORC NLRC5 IFNG PRF1 POU2AF1 APP FEZ1 TLR2 IRF1 CFP SPP1 LIF FOXP3 KIT GATA3 STAT1 RELB THBS1 C2 FADD EPCAM TAL1 CCL21 PLAUR NOS2 PRAME IL23A LILRB1 S100A8 USP9Y TAP1	1.28
GO:0003677	DNA binding	molecular_function	16/95	2465/18668	2.688e-01	3.116e-01	16	RORC NLRC5 C2 PRF1 TAL1 POU2AF1 APP FEZ1 IRF1 RAG1 TLR8 SPP1 FOXP3 GATA3 STAT1 RELB	1.28
GO:0016071	mRNA metabolic process	biological_process	4/95	621/18668	4.272e-01	4.706e-01	4	APP LGALS3 C2 NOS2	1.27
GO:0009117	nucleotide metabolic process	biological_process	7/95	1092/18668	3.974e-01	4.400e-01	7	CCL14 CXCL10 THBS1 ADA CCL18 CCL25 CCL20	1.26
GO:0046914	transition metal ion binding	molecular_function	9/95	1420/18668	3.884e-01	4.315e-01	9	RAG1 RORC SPP1 NOS2 APP ADA S100B S100A8 GATA3	1.25
GO:0022402	cell cycle process	biological_process	8/95	1257/18668	3.947e-01	4.374e-01	8	IFNG LIF THBS1 NOS2 ABCB1 BID C6 IRF1	1.25
GO:0008610	lipid biosynthetic process	biological_process	4/95	634/18668	4.507e-01	4.942e-01	4	FCER1A IFNG PLAUR TAP1	1.24
GO:0006629	lipid metabolic process	biological_process	8/95	1283/18668	4.259e-01	4.695e-01	8	FCER1A RORC IFNG PLAUR FLT3 KIT CCL21 TAP1	1.23
GO:0009058	biosynthetic process	biological_process	38/95	6144/18668	2.031e-01	2.436e-01	38	CXCL10 CD276 RORC NLRC5 IFNG PRF1 POU2AF1 APP FEZ1 TLR2 IRF1 CFP CCL20 FCER1A TLR8 SPP1 LIF FOXP3 KIT ADA CD34 GATA3 STAT1 RELB THBS1 C2 FADD EPCAM TAL1 CCL21 PLAUR NOS2 PRAME IL23A LILRB1 S100A8 USP9Y TAP1	1.22
GO:0016020	membrane	cellular_component	55/95	8884/18668	1.345e-01	1.730e-01	55	IL22RA2 CD276 IFNG MSR1 IL15RA APP IL21R FEZ1 TLR2 PVR IL11RA IL12RB2 FCER1A KIT TNFRSF11B CXCR6 TNFRSF12A THBS1 EPCAM ICOS COLEC12 CEACAM1 TIGIT GZMB LGALS3 PLAUR PRAME LILRB1 KLRC1 CEACAM6 SLAMF7 TAP1 CXCL10 SPINK5 ULBP2 TLR8 CTSG FLT3 ADA CD34 IL2RB CD1A C2 TREM1 FADD ICAM4 C7 CD1C PLAU FN1 ABCB1 SERPINB2 BID CCR3 S100A8	1.22
GO:0006139	nucleobase-containing compound metabolic process	biological_process	37/95	6045/18668	2.304e-01	2.724e-01	37	CCL14 CXCL10 RORC NLRC5 IFNG PRF1 POU2AF1 APP FEZ1 TLR2 IRF1 CCL20 SPP1 LIF FOXP3 KIT ADA GATA3 STAT1 RELB THBS1 C2 ISG20 FADD EPCAM TAL1 RAG1 LGALS3 NOS2 PRAME IL23A CCL18 LILRB1 S100A8 USP9Y CCL25 TAP1	1.20
GO:0006461	protein complex assembly	biological_process	8/95	1307/18668	4.555e-01	4.986e-01	8	CXCL13 FADD TAL1 BID CCL21 FN1 IL2RB COLEC12	1.20
GO:0009987	cellular process	biological_process	91/95	14887/18668	7.771e-02	1.089e-01	91	CCL14 IL22RA2 CD276 IFNG MSR1 POU2AF1 IL15RA APP IL21R IL34 FEZ1 TLR2 IRF1 DEFB1 PVR IL11RA IL12RB2 FCER1A SPP1 KIT TNFRSF11B CXCR6 GATA3 TNFRSF12A STAT1 SAA1 THBS1 EPCAM CTSL ICOS C6 COLEC12 CEACAM1 TIGIT RAG1 GZMB LGALS3 PLAUR PRAME CMA1 LILRB1 KLRC1 CEACAM6 USP9Y SLAMF7 TAP1 CXCL10 OSM RORC NLRC5 IL19 CXCL1 PRF1 SPINK5 CFP CCL20 ULBP2 TLR8 CTSG LIF FOXP3 CXCL13 FLT3 ADA CD34 IFIT1 RELB IL2RB C…	1.20
GO:0009116	nucleoside metabolic process	biological_process	5/95	821/18668	4.889e-01	5.320e-01	5	CCL14 ADA CCL18 CCL25 CCL20	1.20
GO:0006812	cation transport	biological_process	6/95	980/18668	4.741e-01	5.176e-01	6	CXCL10 ADA FCER1A LILRB1 LGALS3 CCL21	1.20
GO:0019637	organophosphate metabolic process	biological_process	9/95	1481/18668	4.576e-01	5.007e-01	9	CCL14 CXCL10 IFNG PLAUR THBS1 ADA CCL18 CCL25 CCL20	1.19
GO:0016482	cytoplasmic transport	biological_process	6/95	1003/18668	5.086e-01	5.510e-01	6	BID IL23A CXCL10 IFNG CCL21 TLR2	1.18
GO:0055086	nucleobase-containing small molecule metabolic process	biological_process	7/95	1161/18668	4.891e-01	5.320e-01	7	CCL14 CXCL10 THBS1 ADA CCL18 CCL25 CCL20	1.18
GO:0046483	heterocycle metabolic process	biological_process	37/95	6226/18668	3.033e-01	3.458e-01	37	CCL14 CXCL10 RORC NLRC5 IFNG PRF1 POU2AF1 APP FEZ1 TLR2 IRF1 CCL20 SPP1 LIF FOXP3 KIT ADA GATA3 STAT1 RELB THBS1 C2 ISG20 FADD EPCAM TAL1 RAG1 LGALS3 NOS2 PRAME IL23A CCL18 LILRB1 S100A8 USP9Y CCL25 TAP1	1.17
GO:0008152	metabolic process	biological_process	70/95	11798/18668	1.834e-01	2.243e-01	70	CCL14 IL22RA2 CD276 IFNG POU2AF1 APP IL34 FEZ1 TLR2 IRF1 IL12RB2 FCER1A SPP1 KIT TNFRSF11B GATA3 STAT1 SAA1 THBS1 EPCAM CTSL C6 RAG1 GZMB LGALS3 PLAUR PRAME CMA1 LILRB1 USP9Y TAP1 CXCL10 OSM RORC NLRC5 IL19 CXCL1 PRF1 SPINK5 CFP CCL20 TLR8 CTSG LIF FOXP3 FLT3 ADA CD34 IFIT1 RELB IL2RB C2 ISG20 TREM1 FADD C7 TAL1 SOCS1 CCL21 PLAU FN1 F13A1 NOS2 ABCB1 SERPINB2 IL23A BID CCL18 S100A8 CCL25	1.17
GO:0034641	cellular nitrogen compound metabolic process	biological_process	39/95	6532/18668	2.808e-01	3.237e-01	39	CCL14 CXCL10 RORC NLRC5 IFNG PRF1 POU2AF1 APP FEZ1 TLR2 IRF1 CCL20 SPP1 LIF FOXP3 KIT ADA CD34 GATA3 STAT1 RELB THBS1 C2 ISG20 FADD EPCAM TAL1 C6 RAG1 LGALS3 NOS2 PRAME IL23A CCL18 LILRB1 S100A8 USP9Y CCL25 TAP1	1.17
GO:0006725	cellular aromatic compound metabolic process	biological_process	37/95	6238/18668	3.086e-01	3.509e-01	37	CCL14 CXCL10 RORC NLRC5 IFNG PRF1 POU2AF1 APP FEZ1 TLR2 IRF1 CCL20 SPP1 LIF FOXP3 KIT ADA GATA3 STAT1 RELB THBS1 C2 ISG20 FADD EPCAM TAL1 RAG1 LGALS3 NOS2 PRAME IL23A CCL18 LILRB1 S100A8 USP9Y CCL25 TAP1	1.17
GO:0043005	neuron projection	cellular_component	5/95	849/18668	5.358e-01	5.777e-01	5	APP ADA FEZ1 STAT1 FADD	1.16
GO:0044237	cellular metabolic process	biological_process	61/95	10382/18668	2.378e-01	2.797e-01	61	CCL14 IL22RA2 CD276 IFNG POU2AF1 APP IL34 FEZ1 TLR2 IRF1 IL12RB2 FCER1A SPP1 KIT TNFRSF11B GATA3 STAT1 SAA1 THBS1 EPCAM CTSL C6 RAG1 LGALS3 PLAUR PRAME CMA1 LILRB1 USP9Y TAP1 CXCL10 OSM RORC NLRC5 IL19 PRF1 CFP CCL20 TLR8 CTSG LIF FOXP3 FLT3 ADA CD34 RELB IL2RB C2 ISG20 FADD TAL1 SOCS1 CCL21 PLAU FN1 F13A1 NOS2 IL23A CCL18 S100A8 CCL25	1.15
GO:0005694	chromosome	cellular_component	5/95	855/18668	5.460e-01	5.885e-01	5	GATA3 IRF1 C2 STAT1 TAL1	1.15
GO:0006886	intracellular protein transport	biological_process	5/95	860/18668	5.545e-01	5.966e-01	5	BID IL23A IFNG TLR2 IFIT1	1.14
GO:0007417	central nervous system development	biological_process	5/95	878/18668	5.854e-01	6.282e-01	5	BID CMA1 S100B LIF TAL1	1.12
GO:0006807	nitrogen compound metabolic process	biological_process	39/95	6901/18668	4.534e-01	4.965e-01	39	CCL14 CXCL10 RORC NLRC5 IFNG PRF1 POU2AF1 APP FEZ1 TLR2 IRF1 CCL20 SPP1 LIF FOXP3 KIT ADA CD34 GATA3 STAT1 RELB THBS1 C2 ISG20 FADD EPCAM TAL1 C6 RAG1 LGALS3 NOS2 PRAME IL23A CCL18 LILRB1 S100A8 USP9Y CCL25 TAP1	1.11
GO:0044265	cellular macromolecule catabolic process	biological_process	5/95	902/18668	6.272e-01	6.711e-01	5	C6 USP9Y ISG20 NOS2 CTSL	1.09
GO:0005623	cell	cellular_component	85/95	15900/18668	6.018e-01	6.449e-01	85	CCL14 IL22RA2 CD276 IFNG MSR1 POU2AF1 IL15RA APP FEZ1 TLR2 IRF1 DEFB1 PVR IL11RA IL12RB2 FCER1A SPP1 KIT TNFRSF11B CXCR6 GATA3 TNFRSF12A STAT1 SAA1 THBS1 EPCAM CTSL ICOS C6 COLEC12 CEACAM1 TIGIT RAG1 GZMB LGALS3 PLAUR PRAME CMA1 LILRB1 KLRC1 CEACAM6 USP9Y SLAMF7 TAP1 CXCL10 OSM RORC NLRC5 CXCL1 PRF1 SPINK5 CFP ULBP2 TLR8 CTSG LIF FOXP3 CXCL13 FLT3 ADA CD34 IFIT1 RELB IL2RB CD1A C2 ISG20 TREM1 FAD…	1.05
GO:0030163	protein catabolic process	biological_process	4/95	748/18668	6.690e-01	7.151e-01	4	IFNG C6 USP9Y CTSL	1.05
GO:0043168	anion binding	molecular_function	14/95	2638/18668	7.390e-01	7.891e-01	14	CXCL10 NLRC5 THBS1 APP FN1 CTSG CXCL13 FLT3 KIT ABCB1 CD34 S100A8 TAP1 SAA1	1.04
GO:0034613	cellular protein localization	biological_process	7/95	1336/18668	7.443e-01	7.944e-01	7	GZMB IFNG LIF BID IL23A TLR2 IFIT1	1.03
GO:0051301	cell division	biological_process	4/95	773/18668	7.185e-01	7.675e-01	4	LIF KIT NOS2 TAL1	1.02
GO:0022607	cellular component assembly	biological_process	12/95	2321/18668	8.062e-01	8.602e-01	12	THBS1 FADD TAL1 CCL21 FN1 PVR COLEC12 CXCL13 KIT BID CD34 IL2RB	1.02
GO:0005737	cytoplasm	cellular_component	53/95	10387/18668	9.122e-01	9.729e-01	53	IL22RA2 MSR1 IL15RA APP FEZ1 TLR2 IRF1 DEFB1 PVR SPP1 KIT STAT1 SAA1 THBS1 CTSL C6 COLEC12 GZMB LGALS3 PLAUR CMA1 LILRB1 USP9Y TAP1 OSM NLRC5 PRF1 SPINK5 CFP TLR8 CTSG LIF FOXP3 CXCL13 FLT3 ADA CD34 IFIT1 RELB CD1A C2 ISG20 FADD SOCS1 CD1C S100B FN1 F13A1 NOS2 SERPINB2 BID CCR3 S100A8	1.00
GO:0003676	nucleic acid binding	molecular_function	20/95	3950/18668	1	1	20	RORC NLRC5 C2 ISG20 PRF1 TAL1 POU2AF1 APP FEZ1 IRF1 RAG1 TLR8 LGALS3 SPP1 FOXP3 NOS2 GATA3 IFIT1 STAT1 RELB	0.99
GO:0030001	metal ion transport	biological_process	4/95	795/18668	1	1	4	CXCL10 LILRB1 LGALS3 CCL21	0.99
GO:0007268	synaptic transmission	biological_process	4/95	799/18668	1	1	4	APP S100B IFNG KIT	0.98
GO:0061024	membrane organization	biological_process	5/95	1011/18668	1	1	5	BID APP GZMB THBS1 C7	0.97
GO:0009056	catabolic process	biological_process	13/95	2630/18668	1	1	13	CCL14 IFNG ISG20 CTSL C6 FEZ1 CCL20 NOS2 ADA CCL18 S100A8 USP9Y CCL25	0.97
GO:0000278	mitotic cell cycle	biological_process	5/95	1024/18668	1	1	5	ABCB1 TAL1 BID APP C6	0.96
GO:0006396	RNA processing	biological_process	4/95	830/18668	1	1	4	APP LGALS3 C2 ISG20	0.95
GO:0006996	organelle organization	biological_process	16/95	3328/18668	1	1	16	C2 CXCL1 TAL1 CCL21 RAG1 GZMB PLAUR SPP1 LIF FOXP3 KIT NOS2 BID CD34 S100A8 GATA3	0.94
GO:0005730	nucleolus	cellular_component	4/95	840/18668	1	1	4	RORC GATA3 ISG20 STAT1	0.94
GO:0005622	intracellular	cellular_component	65/95	13800/18668	1	1	65	IL22RA2 IFNG MSR1 POU2AF1 IL15RA APP FEZ1 TLR2 IRF1 DEFB1 PVR FCER1A SPP1 KIT GATA3 STAT1 SAA1 THBS1 CTSL C6 COLEC12 RAG1 GZMB LGALS3 PLAUR PRAME CMA1 LILRB1 USP9Y TAP1 OSM RORC NLRC5 CXCL1 PRF1 SPINK5 CFP TLR8 CTSG LIF FOXP3 CXCL13 FLT3 ADA CD34 IFIT1 RELB IL2RB CD1A C2 ISG20 TREM1 FADD TAL1 SOCS1 CD1C S100B CCL21 FN1 F13A1 NOS2 SERPINB2 BID CCR3 S100A8	0.93
GO:0012505	endomembrane system	cellular_component	17/95	3599/18668	1	1	17	THBS1 CD1A SPINK5 CTSL IL15RA APP CD1C TLR2 DEFB1 FN1 F13A1 CFP TLR8 CTSG PLAUR FLT3 KIT	0.93
GO:0006811	ion transport	biological_process	7/95	1494/18668	1	1	7	CXCL10 FCER1A LGALS3 THBS1 ADA LILRB1 CCL21	0.92
GO:0042995	cell projection	cellular_component	8/95	1717/18668	1	1	8	PLAUR FADD APP ADA S100B FEZ1 TNFRSF12A STAT1	0.92
GO:0006259	DNA metabolic process	biological_process	5/95	1078/18668	1	1	5	RAG1 IFNG FOXP3 C2 ISG20	0.91
GO:0016787	hydrolase activity	molecular_function	11/95	2409/18668	1	1	11	ISG20 CTSL C6 PLAU RAG1 GZMB CTSG ABCB1 CMA1 ADA USP9Y	0.90
GO:0005794	Golgi apparatus	cellular_component	6/95	1348/18668	1	1	6	TLR8 CD1A IL15RA APP TLR2 DEFB1	0.87
GO:0043231	intracellular membrane-bounded organelle	cellular_component	47/95	10619/18668	1	1	47	MSR1 POU2AF1 IL15RA APP TLR2 IRF1 DEFB1 SPP1 KIT GATA3 STAT1 SAA1 THBS1 CTSL C6 COLEC12 RAG1 GZMB LGALS3 PLAUR PRAME CMA1 TAP1 RORC NLRC5 PRF1 SPINK5 CFP TLR8 CTSG FOXP3 FLT3 ADA CD34 RELB CD1A C2 ISG20 TAL1 SOCS1 CD1C S100B FN1 F13A1 NOS2 BID S100A8	0.87
GO:0044281	small molecule metabolic process	biological_process	13/95	2984/18668	1	1	13	CCL14 CXCL10 IFNG THBS1 C6 CCL20 FCER1A ABCB1 ADA CCL18 GATA3 CCL25 TAP1	0.86
GO:0032991	macromolecular complex	cellular_component	21/95	4815/18668	1	1	21	OSM MSR1 APP TLR2 SPP1 FOXP3 CD34 GATA3 RELB SAA1 THBS1 C2 FADD C7 TAL1 C6 FN1 LGALS3 NOS2 IL23A KLRC1	0.86
GO:0005783	endoplasmic reticulum	cellular_component	7/95	1595/18668	1	1	7	TLR8 PLAUR THBS1 FLT3 SPINK5 IL15RA CFP	0.86
GO:0005789	endoplasmic reticulum membrane	cellular_component	4/95	927/18668	1	1	4	IL15RA TLR8 PLAUR SPINK5	0.85
GO:0043234	protein complex	cellular_component	18/95	4224/18668	1	1	18	OSM APP TLR2 SPP1 FOXP3 CD34 GATA3 RELB SAA1 THBS1 C2 FADD C7 TAL1 C6 FN1 IL23A KLRC1	0.84
GO:0097159	organic cyclic compound binding	molecular_function	25/95	5902/18668	1	1	25	RORC NLRC5 PRF1 POU2AF1 APP FEZ1 IRF1 TLR8 SPP1 FOXP3 FLT3 KIT ADA GATA3 IFIT1 STAT1 RELB C2 ISG20 TAL1 RAG1 LGALS3 NOS2 ABCB1 TAP1	0.83
GO:0042175	nuclear outer membrane-endoplasmic reticulum membrane network	cellular_component	4/95	944/18668	1	1	4	IL15RA TLR8 PLAUR SPINK5	0.83
GO:0043229	intracellular organelle	cellular_component	48/95	11718/18668	1	1	48	MSR1 POU2AF1 IL15RA APP FEZ1 TLR2 IRF1 DEFB1 SPP1 KIT GATA3 STAT1 SAA1 THBS1 CTSL C6 COLEC12 RAG1 GZMB LGALS3 PLAUR PRAME CMA1 TAP1 RORC NLRC5 PRF1 SPINK5 CFP TLR8 CTSG FOXP3 FLT3 ADA CD34 RELB CD1A C2 ISG20 TAL1 SOCS1 CD1C S100B FN1 F13A1 NOS2 BID S100A8	0.80
GO:0005634	nucleus	cellular_component	27/95	6776/18668	1	1	27	RORC NLRC5 PRF1 POU2AF1 IL15RA APP IRF1 CTSG SPP1 FOXP3 GATA3 STAT1 RELB C2 ISG20 TAL1 SOCS1 CTSL S100B C6 RAG1 GZMB LGALS3 NOS2 PRAME S100A8 TAP1	0.78
GO:0005654	nucleoplasm	cellular_component	11/95	2778/18668	1	1	11	RORC C2 ISG20 TAL1 C6 IRF1 RAG1 SPP1 GATA3 STAT1 RELB	0.78
GO:0046872	metal ion binding	molecular_function	16/95	4063/18668	1	1	16	RORC THBS1 ISG20 PRF1 APP S100B F13A1 COLEC12 RAG1 SPP1 FOXP3 KIT NOS2 ADA GATA3 S100A8	0.77
GO:0043169	cation binding	molecular_function	16/95	4154/18668	1	1	16	RORC PRF1 APP SPP1 FOXP3 KIT ADA GATA3 THBS1 ISG20 S100B F13A1 COLEC12 RAG1 NOS2 S100A8	0.76
GO:0007010	cytoskeleton organization	biological_process	4/95	1032/18668	1	1	4	KIT CXCL1 S100A8 CCL21	0.76
GO:0036094	small molecule binding	molecular_function	10/95	2605/18668	1	1	10	RORC NLRC5 THBS1 C2 FLT3 KIT ABCB1 ADA S100A8 TAP1	0.75
GO:0003723	RNA binding	molecular_function	6/95	1582/18668	1	1	6	TLR8 LGALS3 C2 ISG20 NOS2 IFIT1	0.75
GO:0031090	organelle membrane	cellular_component	11/95	2996/18668	1	1	11	CD1A MSR1 SPINK5 IL15RA APP CD1C COLEC12 TLR8 LGALS3 PLAUR BID	0.72
GO:0031981	nuclear lumen	cellular_component	11/95	3406/18668	1	1	11	RORC C2 ISG20 TAL1 C6 IRF1 RAG1 SPP1 GATA3 STAT1 RELB	0.63
GO:0050877	neurological system process	biological_process	4/95	1352/18668	1	1	4	IFNG KIT APP S100B	0.58
GO:0003824	catalytic activity	molecular_function	16/95	5559/18668	1	1	16	CTSG SPP1 FLT3 KIT ADA ISG20 CTSL C6 PLAU F13A1 RAG1 GZMB ABCB1 CMA1 USP9Y TAP1	0.57
GO:0016740	transferase activity	molecular_function	5/95	1831/18668	1	1	5	SPP1 FLT3 KIT TAP1 F13A1	0.54
GO:0001883	purine nucleoside binding	molecular_function	5/95	1815/18668	1	1	5	NLRC5 FLT3 KIT ABCB1 ADA	0.54
GO:0005524	ATP binding	molecular_function	4/95	1467/18668	1	1	4	NLRC5 FLT3 KIT ABCB1	0.54
GO:0001882	nucleoside binding	molecular_function	5/95	1822/18668	1	1	5	NLRC5 FLT3 KIT ABCB1 ADA	0.54
GO:0030554	adenyl nucleotide binding	molecular_function	4/95	1510/18668	1	1	4	NLRC5 FLT3 KIT ABCB1	0.52
GO:0035639	purine ribonucleoside triphosphate binding	molecular_function	4/95	1802/18668	1	1	4	NLRC5 FLT3 KIT ABCB1	0.44
GO:0032549	ribonucleoside binding	molecular_function	4/95	1815/18668	1	1	4	NLRC5 FLT3 KIT ABCB1	0.43
GO:0000166	nucleotide binding	molecular_function	5/95	2317/18668	1	1	5	NLRC5 C2 FLT3 KIT ABCB1	0.42
GO:0017076	purine nucleotide binding	molecular_function	4/95	1853/18668	1	1	4	NLRC5 FLT3 KIT ABCB1	0.42
GO:0005856	cytoskeleton	cellular_component	4/95	2100/18668	1	1	4	FEZ1 S100A8 RELB SAA1	0.37
